# Supplementary material for: Lipidomic Profiling Identifies a Novel Lipid Signature Associated with Ethnicity-Specific Disparity of Bladder Cancer
Source: MDPI journal article supplement (doi:10.3390/metabo12060544), 2022-06-14
Supplement: s1 [file s1]

(A)

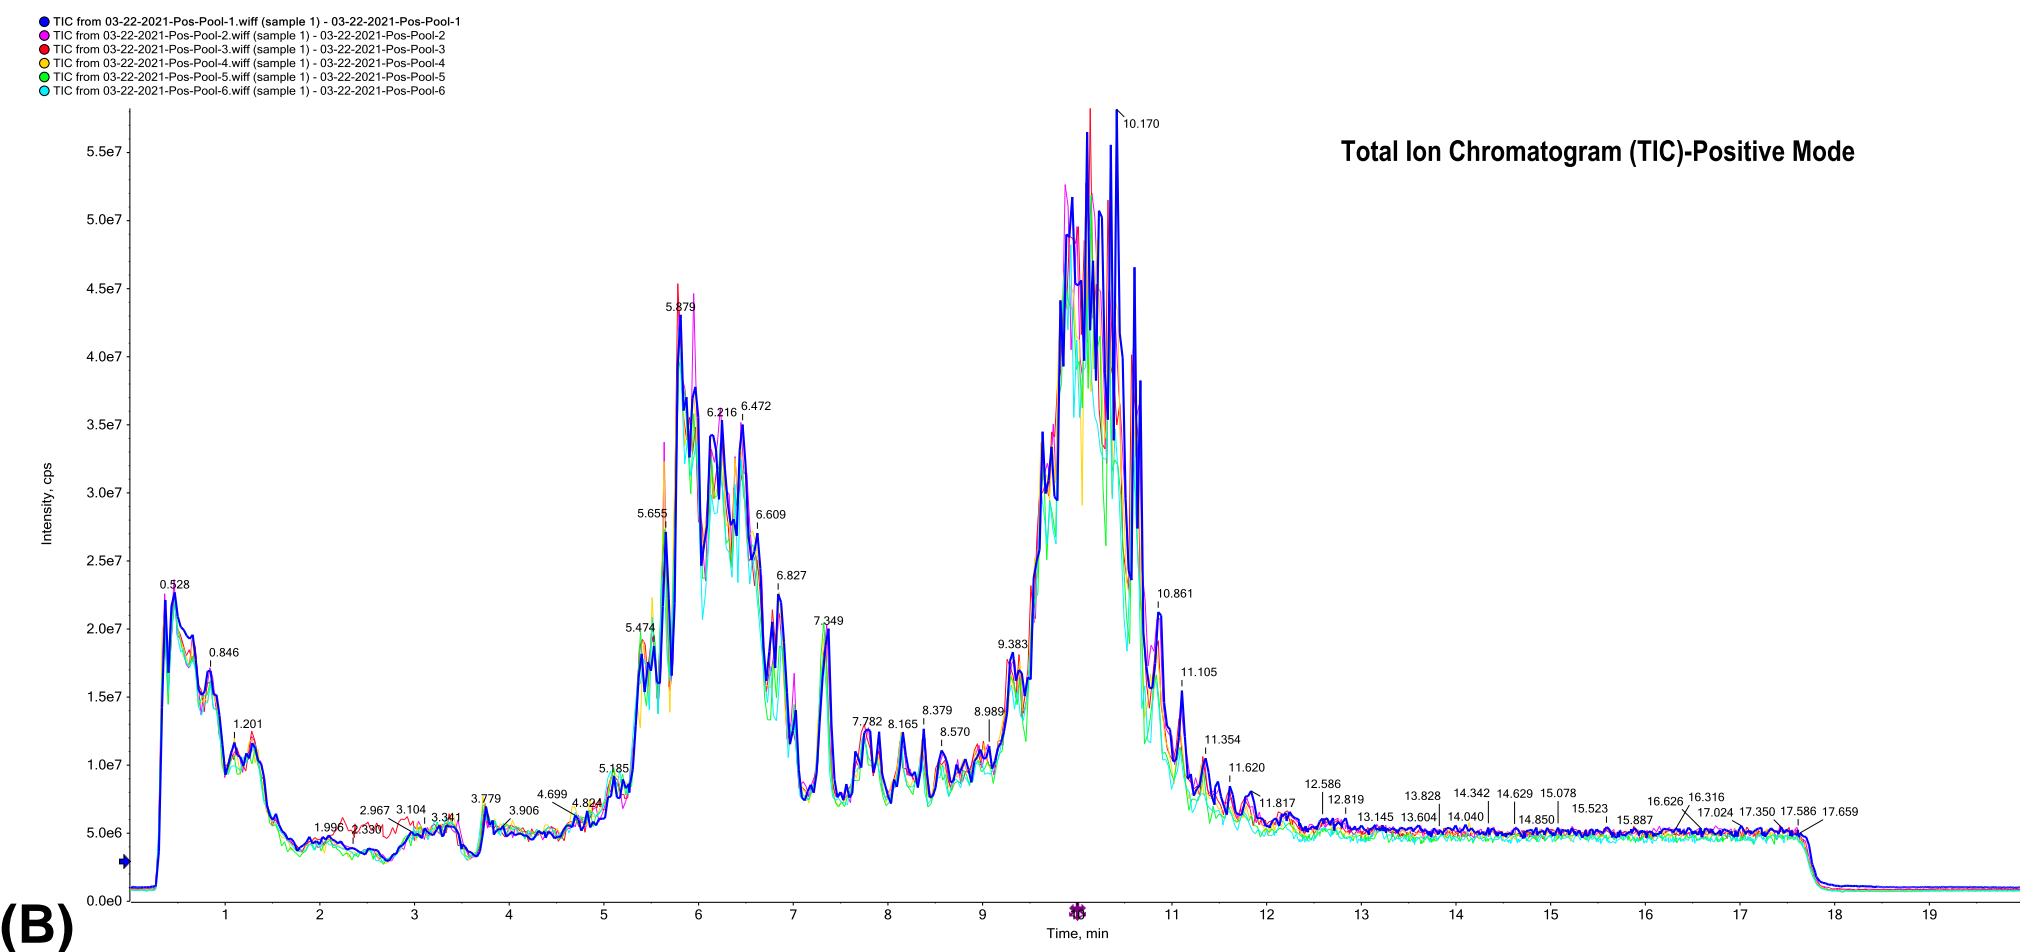

(B)

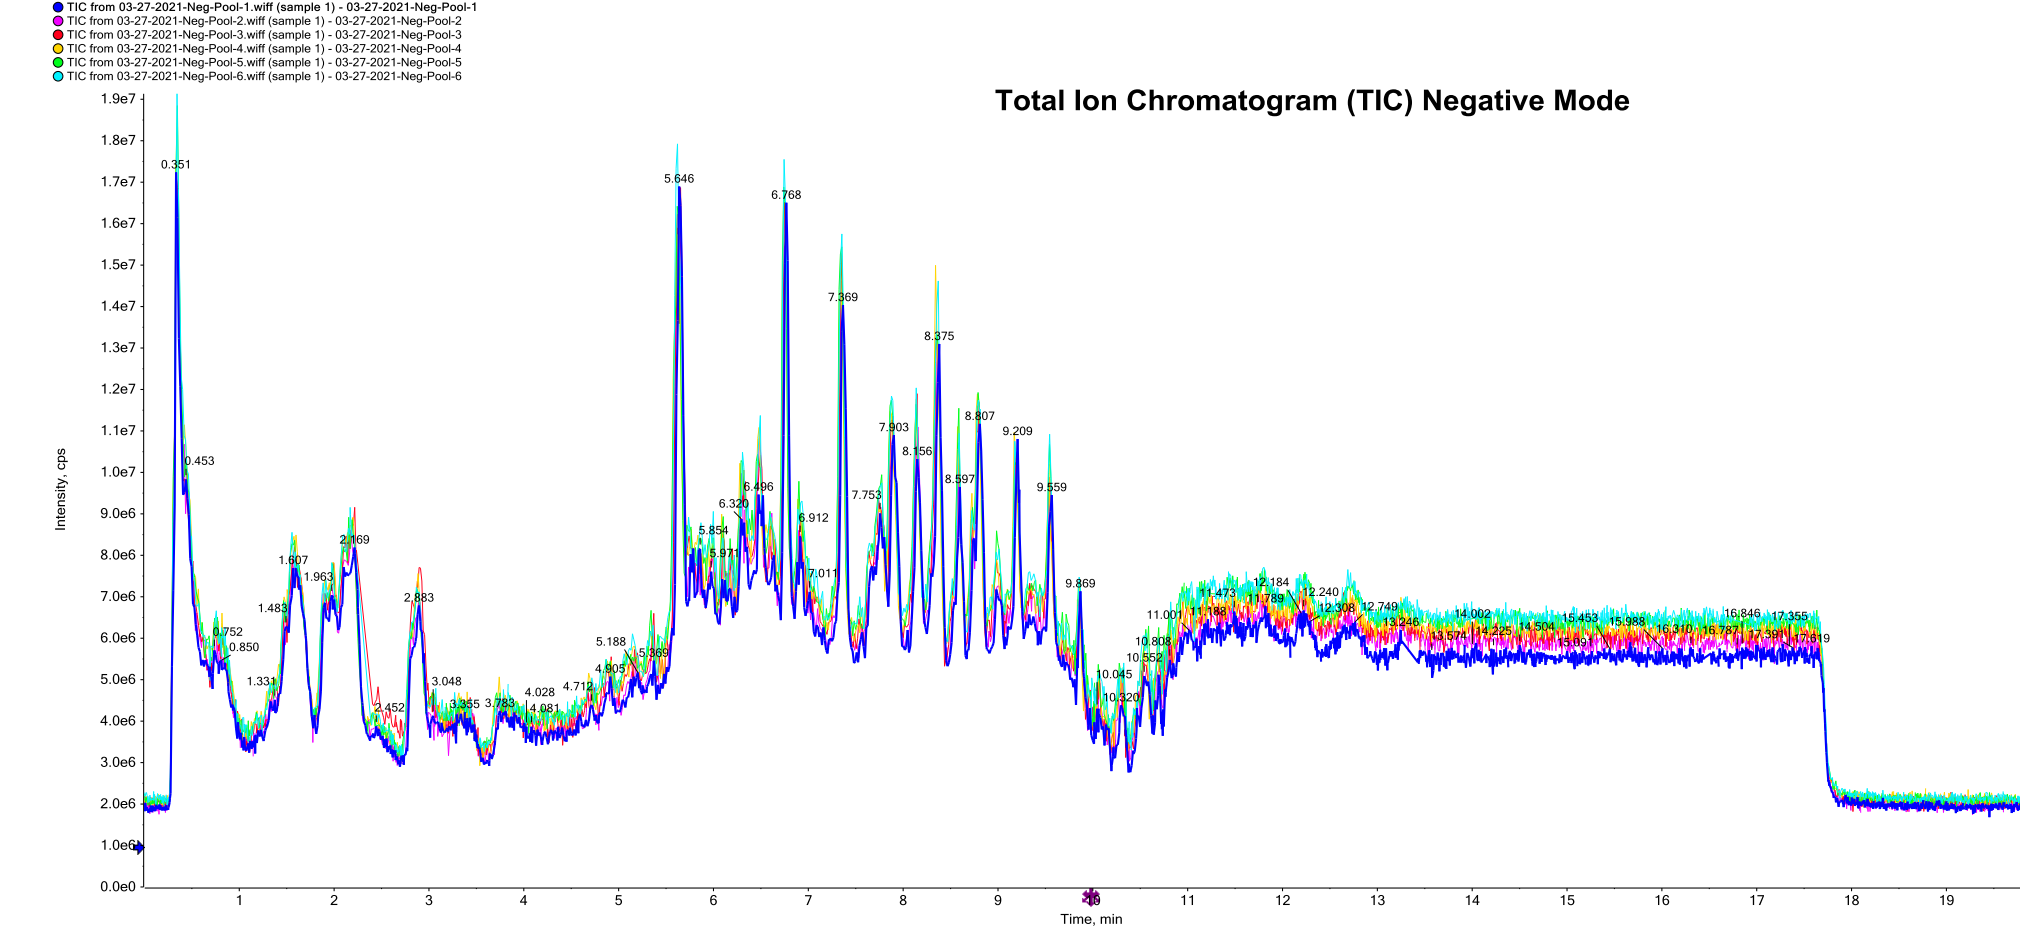

Supplementary Figure S1.

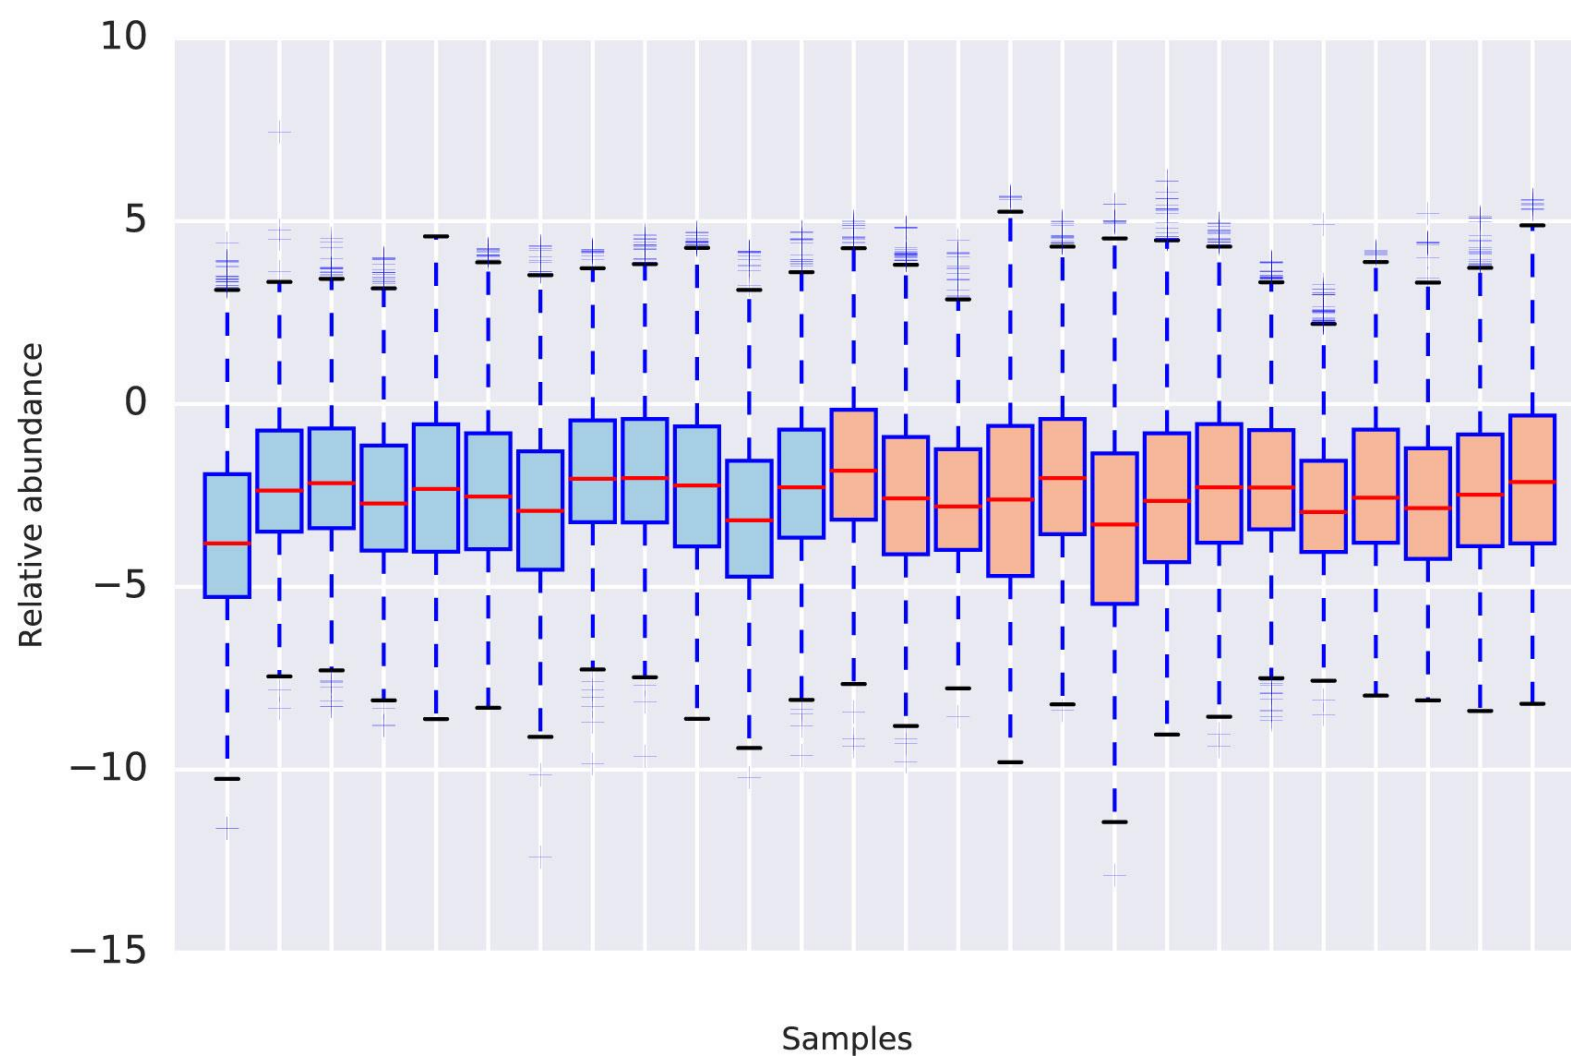

**Supplementary Figure S2.**

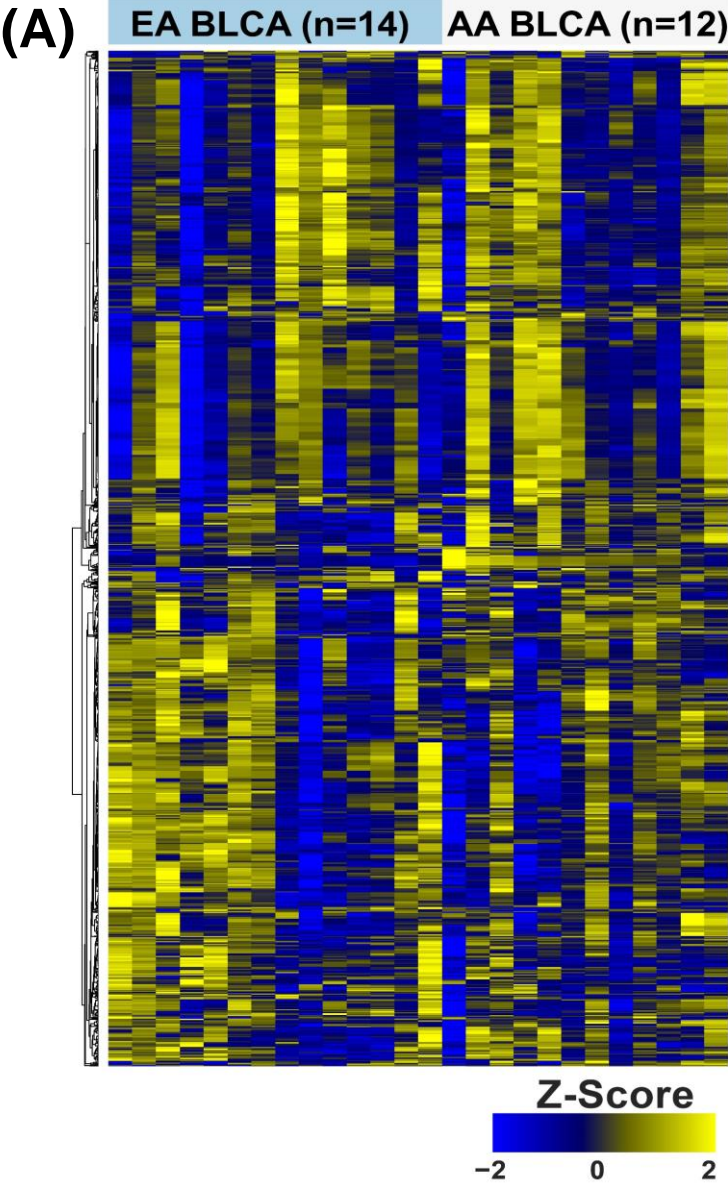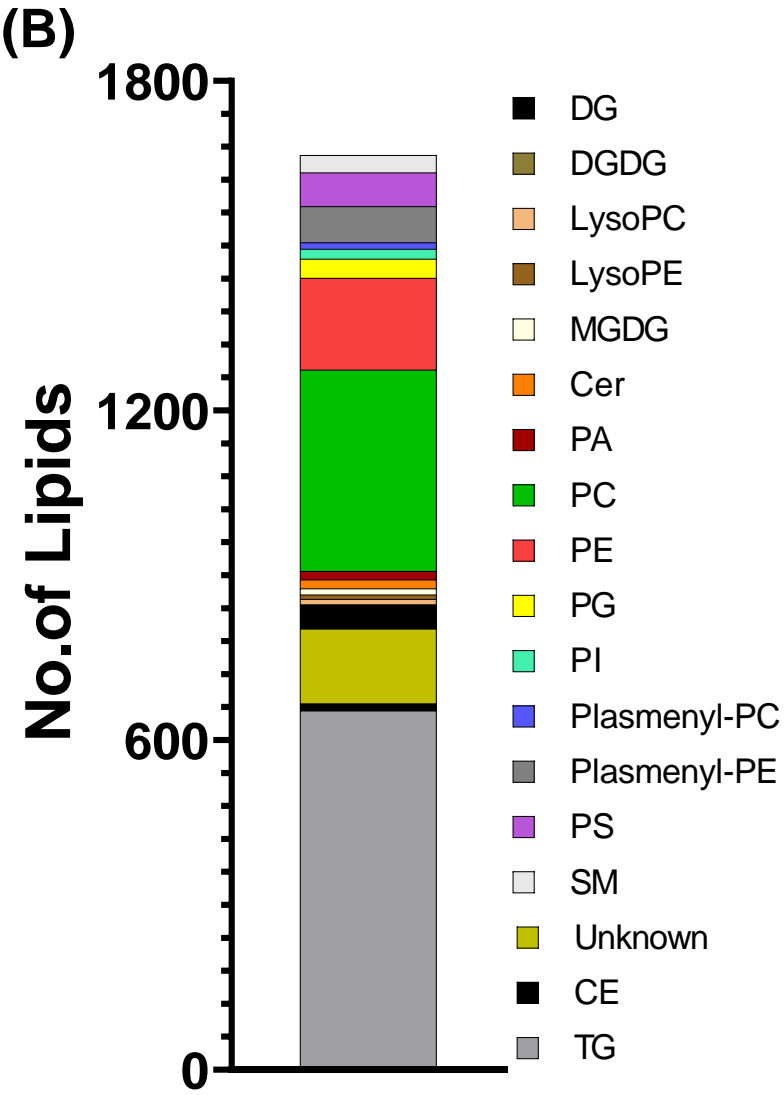

Supplementary Figure S3.

**Supplementary Table S1.**

| ESI Mode | Name                                                    | m/z       |
|----------|---------------------------------------------------------|-----------|
| Positive | CE(16:1); [M+NH4] <sup>+</sup> ; 16:1 Cholesteryl ester | 753.61337 |
| Positive | CE(16:2); [M+NH4] <sup>+</sup> ; 16:2 Cholesteryl ester | 829.56922 |
| Positive | CE(17:0); [M+NH4] <sup>+</sup> ; 17:0 Cholesteryl ester | 754.54842 |
| Positive | CE(17:1); [M+NH4] <sup>+</sup> ; 17:1 Cholesteryl ester | 529.39935 |
| Positive | CE(18:1); [M+NH4] <sup>+</sup> ; 18:1 Cholesteryl ester | 625.5908  |
| Positive | CE(18:2); [M+NH4] <sup>+</sup> ; 18:2 Cholesteryl ester | 642.6148  |
| Positive | CE(18:3); [M+NH4] <sup>+</sup> ; 18:3 Cholesteryl ester | 640.6023  |
| Positive | CE(20:3); [M+NH4] <sup>+</sup> ; 20:3 Cholesteryl ester | 637.5545  |
| Positive | CE(20:4); [M+NH4] <sup>+</sup> ; 20:4 Cholesteryl ester | 656.5998  |
| Positive | CE(22:1); [M+NH4] <sup>+</sup> ; 22:1 Cholesteryl ester | 654.5794  |
| Positive | CE(22:2); [M+NH4] <sup>+</sup> ; 22:2 Cholesteryl ester | 671.5723  |
| Positive | CE(22:5); [M+NH4] <sup>+</sup> ; 22:5 Cholesteryl ester | 668.6332  |
| Positive | CE(22:6); [M+NH4] <sup>+</sup> ; 22:6 Cholesteryl ester | 666.6168  |
| Positive | DG 27:2; [M+NH4] <sup>+</sup> ; DG(9:0/18:2/0:0)        | 664.6005  |
| Positive | DG 28:0; [M+NH4] <sup>+</sup> ; DG(14:0/14:0/0:0)       | 698.6058  |
| Positive | DG 32:0; [M+NH4] <sup>+</sup> ; DG(16:0/16:0/0:0)       | 696.6609  |
| Positive | DG 32:1; [M+NH4] <sup>+</sup> ; DG(14:0/18:1/0:0)       | 694.6457  |
| Positive | DG 32:1; [M+NH4] <sup>+</sup> ; DG(16:0/16:1/0:0)       | 692.6292  |
| Positive | DG 32:2; [M+NH4] <sup>+</sup> ; DG(14:0/18:2/0:0)       | 690.6145  |
| Positive | DG 32:2; [M+NH4] <sup>+</sup> ; DG(14:1/18:1/0:0)       | 688.6055  |
| Positive | DG 32:2; [M+NH4] <sup>+</sup> ; DG(16:1/16:1/0:0)       | 723.6004  |
| Positive | DG 34:0; [M+NH4] <sup>+</sup> ; DG(16:0/18:0/0:0)       | 722.5025  |
| Positive | DG 34:1; [M+NH4] <sup>+</sup> ; DG(16:0/18:1/0:0)       | 718.6499  |
| Positive | DG 34:2; [M+NH4] <sup>+</sup> ; DG(16:0/18:2/0:0)       | 716.6384  |
| Positive | DG 34:2; [M+NH4] <sup>+</sup> ; DG(16:1/18:1/0:0)       | 714.6177  |
| Positive | DG 34:3; [M+NH4] <sup>+</sup> ; DG(16:0/18:3/0:0)       | 751.729   |
| Positive | DG 34:3; [M+NH4] <sup>+</sup> ; DG(16:1/18:2/0:0)       | 463.1308  |
| Positive | DG 36:1; [M+NH4] <sup>+</sup> ; DG(18:0/18:1/0:0)       | 476.3814  |
| Positive | DG 36:2; [M+NH4] <sup>+</sup> ; DG(18:0/18:2/0:0)       | 502.4067  |
| Positive | DG 36:2; [M+NH4] <sup>+</sup> ; DG(18:1/18:1/0:0)       | 500.4328  |
| Positive | DG 36:3; [M+NH4] <sup>+</sup> ; DG(16:0/20:3/0:0)       | 498.4139  |
| Positive | DG 36:3; [M+NH4] <sup>+</sup> ; DG(18:1/18:2/0:0)       | 512.4274  |
| Positive | DG 38:2; [M+NH4] <sup>+</sup> ; DG(18:0/20:2/0:0)       | 530.4749  |
| Positive | DG 38:2; [M+NH4] <sup>+</sup> ; DG(18:1/20:1/0:0)       | 530.3963  |
| Positive | DG 38:3; [M+NH4] <sup>+</sup> ; DG(18:0/20:3/0:0)       | 528.4661  |
| Positive | DG 38:3; [M+NH4] <sup>+</sup> ; DG(18:1/20:2/0:0)       | 528.4599  |
| Positive | DG 38:4; [M+NH4] <sup>+</sup> ; DG(16:0/22:4/0:0)       | 526.4443  |
| Positive | DG 38:4; [M+NH4] <sup>+</sup> ; DG(18:0/20:4/0:0)       | 544.4936  |

|          |                                                                                                               |          |
|----------|---------------------------------------------------------------------------------------------------------------|----------|
| Positive | DG 38:4; [M+NH4] <sup>+</sup> ; DG(18:1/20:3/0:0)                                                             | 558.5059 |
| Positive | DG 38:4; [M+NH4] <sup>+</sup> ; DG(18:2/20:2/0:0)                                                             | 556.4949 |
| Positive | DG 38:5; [M+NH4] <sup>+</sup> ; DG(18:2/20:3/0:0)                                                             | 556.4904 |
| Positive | DG 40:4; [M+NH4] <sup>+</sup> ; DG(16:0/24:4/0:0)                                                             | 556.491  |
| Positive | DG 40:4; [M+NH4] <sup>+</sup> ; DG(18:0/22:4/0:0)                                                             | 554.5015 |
| Positive | DG 40:4; [M+NH4] <sup>+</sup> ; DG(18:2/22:2/0:0)                                                             | 554.4814 |
| Positive | DG 40:4; [M+NH4] <sup>+</sup> ; DG(20:1/20:3/0:0)                                                             | 540.4161 |
| Positive | DG 40:5; [M+NH4] <sup>+</sup> ; DG(18:0/22:5/0:0)                                                             | 572.5219 |
| Positive | DG 40:5; [M+NH4] <sup>+</sup> ; DG(18:1/22:4/0:0)                                                             | 570.5104 |
| Positive | DG 40:6; [M+NH4] <sup>+</sup> ; DG(18:1/22:5/0:0)                                                             | 568.4926 |
| Positive | DG 40:6; [M+NH4] <sup>+</sup> ; DG(18:2/22:4/0:0)                                                             | 586.4647 |
| Positive | DG 41:0; [M+NH4] <sup>+</sup> ; DG(16:0/25:0/0:0)                                                             | 584.5225 |
| Positive | DG 42:10; [M+NH4] <sup>+</sup> ; DG(20:4/22:6/0:0)                                                            | 584.5237 |
| Positive | DG 42:6; [M+NH4] <sup>+</sup> ; DG(20:0/22:6/0:0)                                                             | 582.5091 |
| Positive | DG 42:7; [M+Li] <sup>+</sup> ; DG(20:3/22:4/0:0)                                                              | 582.5102 |
| Positive | DG 42:9; [M+NH4] <sup>+</sup> ; DG(20:3/22:6/0:0)                                                             | 582.5096 |
| Positive | DG 42:9; [M+NH4] <sup>+</sup> ; DG(20:4/22:5/0:0)                                                             | 580.4913 |
| Positive | DG 44:9; [M+NH4] <sup>+</sup> ; DG(22:4/22:5/0:0)                                                             | 578.4814 |
| Positive | lysoPC 15:1; [M+H] <sup>+</sup> ; PC(15:1(9Z)/0:0)                                                            | 600.5492 |
| Positive | lysoPC 16:0; [M+H] <sup>+</sup> ; PC(O-16:0/0:0)                                                              | 600.5541 |
| Positive | lysoPC 18:0; [M+H] <sup>+</sup> ; PC(18:0/0:0)                                                                | 598.5407 |
| Positive | lysoPC 18:1; [M+H] <sup>+</sup> ; PC(18:1(11E)/0:0)                                                           | 598.5385 |
| Positive | lysoPC 18:2; [M+H] <sup>+</sup> ; PC(18:2(2E,4E)/0:0)                                                         | 598.5397 |
| Positive | lysoPC 20:3; [M+H] <sup>+</sup> ; PC(20:3(5Z,8Z,11Z)/0:0)                                                     | 596.5243 |
| Positive | lysoPC 22:1; [M+H] <sup>+</sup> ; PC(22:1(13Z)/0:0)                                                           | 596.5256 |
| Positive | lysoPC 22:2; [M+H] <sup>+</sup> ; PC(22:2(13Z,16Z)/0:0)                                                       | 594.509  |
| Positive | lysoPC 23:0; [M+H] <sup>+</sup> ; PC(23:0/0:0)                                                                | 594.5095 |
| Positive | lysoPC 26:1; [M+H] <sup>+</sup> ; PC(26:1(5Z)/0:0)                                                            | 614.5718 |
| Positive | MGDG 36:3; [M+Na] <sup>+</sup> ; MGDG(18:1(11E)/18:2(2E,4E))                                                  | 612.5558 |
| Positive | MGDG 38:5; [M+Na] <sup>+</sup> ; MGDG(18:1(11E)/20:4(5E,8E,11E,14E))                                          | 610.5389 |
| Positive | N-(15Z-tetracosenoyl)-sphing-4-enine; [M+H] <sup>+</sup> ; Cer(d18:1(4E)/24:1(15Z))                           | 610.5418 |
| Positive | N-(17Z-hexacosenoyl)-sphing-4-enine; [M+H] <sup>+</sup> ; Cer(d18:1(4E)/26:1(17Z))                            | 608.5267 |
| Positive | N-(17Z-hexacosenoyl)-sphinganine; [M+H] <sup>+</sup> ; Cer(d18:0/26:1(17Z))                                   | 608.5225 |
| Positive | N-(5Z,8Z,11Z,14Z-tetracosatetraenoyl)-sphing-4-enine; [M+H] <sup>+</sup> ; Cer(d18:1(4E)/24:4(5Z,8Z,11Z,14Z)) | 606.5074 |
| Positive | N-(9Z-octadecenoyl)-sphinganine; [M+H] <sup>+</sup> ; Cer(d18:0/18:1(9Z))                                     | 628.5856 |
| Positive | N-(docosanoyl)-sphing-4-enine; [M+H] <sup>+</sup> ; Cer(d18:1(4E)/22:0)                                       | 628.5887 |
| Positive | N-(docosanoyl)-sphinganine; [M+H] <sup>+</sup> ; Cer(d18:0/22:0)                                              | 626.5721 |
| Positive | N-(eicosanoyl)-sphing-4-enine; [M+H] <sup>+</sup> ; Cer(d18:1(4E)/20:0)                                       | 626.574  |
| Positive | N-(hexacosanoyl)-sphing-4-enine; [M+H] <sup>+</sup> ; Cer(d18:1(4E)/26:0)                                     | 624.5534 |
| Positive | N-(hexacosanoyl)-sphinganine; [M+H] <sup>+</sup> ; Cer(d18:0/26:0)                                            | 624.5528 |
| Positive | N-(hexadecanoyl)-sphing-4-enine; [M+H] <sup>+</sup> ; Cer(d18:1(4E)/16:0)                                     | 622.5406 |

|          |                                                                            |          |
|----------|----------------------------------------------------------------------------|----------|
| Positive | N-(hexadecanoyl)-sphinganine; [M+H] <sup>+</sup> ; Cer(d18:0/16:0)         | 622.5392 |
| Positive | N-(octadecanoyl)-sphing-4-enine; [M+H] <sup>+</sup> ; Cer(d18:1(4E)/18:0)  | 620.5282 |
| Positive | N-(tetracosanoyl)-sphing-4-enine; [M+H] <sup>+</sup> ; Cer(d18:1(4E)/24:0) | 620.5194 |
| Positive | N-(tetracosanoyl)-sphinganine; [M+H] <sup>+</sup> ; Cer(d18:0/24:0)        | 642.6009 |
| Positive | PA 36:0; [M+Na <sup>2+</sup> ] <sup>+</sup> ; GPA(17:0/19:0)               | 642.6012 |
| Positive | PC 15:0; [M+H] <sup>+</sup> ; GPCho(6:0/9:0)                               | 640.6198 |
| Positive | PC 26:0; [M+Na] <sup>+</sup> ; GPCho(11:0/15:0)                            | 640.5872 |
| Positive | PC 26:0; [M+Na] <sup>+</sup> ; GPCho(6:0/20:0)                             | 639.5166 |
| Positive | PC 27:3; [M+Na] <sup>+</sup> ; GPCho(7:0/20:3(5Z,8Z,11Z))                  | 638.569  |
| Positive | PC 28:3; [M+H] <sup>+</sup> ; GPCho(20:3(5Z,8Z,11Z)/8:0)                   | 638.5716 |
| Positive | PC 29:0; [M+Na] <sup>+</sup> ; GPCho(12:0/17:0)                            | 636.5575 |
| Positive | PC 29:0; [M+Na] <sup>+</sup> ; GPCho(14:0/15:0)                            | 636.5551 |
| Positive | PC 29:2; [M+H] <sup>+</sup> ; GPCho(11:0/18:2(2E,4E))                      | 634.5958 |
| Positive | PC 30:0; [M+Na] <sup>+</sup> ; GPCho(11:0/19:0)                            | 632.5245 |
| Positive | PC 30:0; [M+Na] <sup>+</sup> ; GPCho(12:0/18:0)                            | 656.6144 |
| Positive | PC 31:0; [M+Na] <sup>+</sup> ; GPCho(26:0/5:0)                             | 656.6287 |
| Positive | PC 31:3; [M+H] <sup>+</sup> ; GPCho(13:0/18:3(6Z,9Z,12Z))                  | 654.6081 |
| Positive | PC 31:6; [M+H] <sup>+</sup> ; GPCho(9:0/22:6(4Z,7Z,10Z,13Z,16Z,19Z))       | 654.6013 |
| Positive | PC 32:0; [M+Na] <sup>+</sup> ; GPCho(10:0/22:0)                            | 652.5874 |
| Positive | PC 32:0; [M+Na] <sup>+</sup> ; GPCho(11:0/21:0)                            | 652.5863 |
| Positive | PC 32:0; [M+Na] <sup>+</sup> ; GPCho(14:0/18:0)                            | 650.571  |
| Positive | PC 32:0; [M+Na] <sup>+</sup> ; GPCho(15:0/17:0)                            | 670.6297 |
| Positive | PC 32:0; [M+Na] <sup>+</sup> ; GPCho(16:0/16:0)                            | 670.6341 |
| Positive | PC 32:0; [M+Na] <sup>+</sup> ; GPCho(19:0/13:0)                            | 670.638  |
| Positive | PC 32:0; [M+Na] <sup>+</sup> ; GPCho(24:0/8:0)                             | 668.6184 |
| Positive | PC 32:0; [M+Na] <sup>+</sup> ; GPCho(6:0/26:0)                             | 668.6162 |
| Positive | PC 32:0; [M+Na] <sup>+</sup> ; GPCho(7:0/25:0)                             | 666.6024 |
| Positive | PC 32:0; [M+Na] <sup>+</sup> ; GPCho(8:0/24:0)                             | 666.6057 |
| Positive | PC 32:1; [M+Na] <sup>+</sup> ; GPCho(12:0/20:1(11Z))                       | 664.5878 |
| Positive | PC 32:1; [M+Na] <sup>+</sup> ; GPCho(16:0/16:1(7Z))                        | 664.5859 |
| Positive | PC 32:2; [M+Na] <sup>+</sup> ; GPCho(14:0/18:2(2E,4E))                     | 664.6357 |
| Positive | PC 32:2; [M+Na] <sup>+</sup> ; GPCho(16:1(7Z)/16:1(7Z))                    | 662.5709 |
| Positive | PC 32:4; [M+H] <sup>+</sup> ; GPCho(14:0/18:4(6Z,9Z,12Z,15Z))              | 662.5724 |
| Positive | PC 32:4; [M+H] <sup>+</sup> ; GPCho(8:0/24:4(5Z,8Z,11Z,14Z))               | 662.5725 |
| Positive | PC 32:5; [M+H] <sup>+</sup> ; GPCho(10:0/22:5(4Z,7Z,10Z,13Z,16Z))          | 662.57   |
| Positive | PC 33:0; [M+Na] <sup>+</sup> ; GPCho(10:0/23:0)                            | 660.5074 |
| Positive | PC 33:2; [M+H] <sup>+</sup> ; GPCho(11:0/22:2(13Z,16Z))                    | 660.5545 |
| Positive | PC 33:2; [M+Na] <sup>+</sup> ; GPCho(7:0/26:2(5E,9Z))                      | 647.5624 |
| Positive | PC 33:5; [M+H] <sup>+</sup> ; GPCho(11:0/22:5(4Z,7Z,10Z,13Z,16Z))          | 658.5415 |
| Positive | PC 34:0; [M+H] <sup>+</sup> ; GPCho(17:0/17:0)                             | 676.5843 |
| Positive | PC 34:0; [M+Na] <sup>+</sup> ; GPCho(10:0/24:0)                            | 674.5696 |

|          |                                                                               |          |
|----------|-------------------------------------------------------------------------------|----------|
| Positive | PC 34:0; [M+Na] <sup>+</sup> ; GPCho(12:0/22:0)                               | 698.6641 |
| Positive | PC 34:0; [M+Na] <sup>+</sup> ; GPCho(16:0/18:0)                               | 698.6665 |
| Positive | PC 34:0; [M+Na] <sup>+</sup> ; GPCho(24:0/10:0)                               | 696.6462 |
| Positive | PC 34:0; [M+Na] <sup>+</sup> ; GPCho(9:0/25:0)                                | 696.646  |
| Positive | PC 34:1; [M+Na] <sup>+</sup> ; GPCho(12:0/22:1(13Z))                          | 696.6524 |
| Positive | PC 34:1; [M+Na] <sup>+</sup> ; GPCho(16:0/18:1(11E))                          | 696.647  |
| Positive | PC 34:2; [M+Na] <sup>+</sup> ; GPCho(16:0/18:2(2E,4E))                        | 694.6363 |
| Positive | PC 34:3; [M+H] <sup>+</sup> ; GPCho(16:0/18:3(6Z,9Z,12Z))                     | 694.6326 |
| Positive | PC 34:3; [M+H] <sup>+</sup> ; GPCho(16:1(7Z)/18:2(2E,4E))                     | 694.6365 |
| Positive | PC 34:3; [M+Na] <sup>+</sup> ; GPCho(16:1(7Z)/18:2(2E,4E))                    | 692.619  |
| Positive | PC 34:4; [M+H] <sup>+</sup> ; GPCho(10:0/24:4(5Z,8Z,11Z,14Z))                 | 692.6193 |
| Positive | PC 34:4; [M+H] <sup>+</sup> ; GPCho(22:4(7Z,10Z,13Z,16Z)/12:0)                | 692.6216 |
| Positive | PC 34:5; [M+H] <sup>+</sup> ; GPCho(14:0/20:5(5Z,8Z,11Z,14Z,17Z))             | 692.6185 |
| Positive | PC 34:5; [M+H] <sup>+</sup> ; GPCho(16:1(9Z)/18:4(6Z,9Z,12Z,15Z))             | 690.6005 |
| Positive | PC 34:6; [M+H] <sup>+</sup> ; GPCho(12:0/22:6(4Z,7Z,10Z,13Z,16Z,19Z))         | 690.6049 |
| Positive | PC 34:6; [M+H] <sup>+</sup> ; GPCho(14:1(9Z)/20:5(5Z,8Z,11Z,14Z,17Z))         | 690.5985 |
| Positive | PC 35:1; [M+Na] <sup>+</sup> ; GPCho(17:0/18:1(11E))                          | 690.6034 |
| Positive | PC 35:4; [M+H] <sup>+</sup> ; GPCho(11:0/24:4(5Z,8Z,11Z,14Z))                 | 688.5833 |
| Positive | PC 35:5; [M+Na] <sup>+</sup> ; GPCho(13:0/22:5(4Z,7Z,10Z,13Z,16Z))            | 688.5854 |
| Positive | PC 35:5; [M+Na] <sup>+</sup> ; GPCho(15:0/20:5(5Z,8Z,11Z,14Z,17Z))            | 686.571  |
| Positive | PC 35:5; [M+Na] <sup>+</sup> ; GPCho(15:1(9Z)/20:4(5E,8E,11E,14E))            | 686.5724 |
| Positive | PC 35:5; [M+Na] <sup>+</sup> ; GPCho(17:2(9Z,12Z)/18:3(6Z,9Z,12Z))            | 684.5561 |
| Positive | PC 36:1; [M+H] <sup>+</sup> ; GPCho(12:0/24:1(15Z))                           | 684.5558 |
| Positive | PC 36:1; [M+H] <sup>+</sup> ; GPCho(18:0/18:1(11E))                           | 712.6871 |
| Positive | PC 36:1; [M+Na] <sup>+</sup> ; GPCho(18:0/18:1(11E))                          | 710.6664 |
| Positive | PC 36:2; [M+H] <sup>+</sup> ; GPCho(18:1(11E)/18:1(11E))                      | 708.6466 |
| Positive | PC 36:2; [M+Na] <sup>+</sup> ; GPCho(18:0/18:2(2E,4E))                        | 726.6995 |
| Positive | PC 36:2; [M+Na] <sup>+</sup> ; GPCho(18:1(11E)/18:1(11E))                     | 724.6824 |
| Positive | PC 36:3; [M+H] <sup>+</sup> ; GPCho(16:0/20:3(5Z,8Z,11Z))                     | 724.6843 |
| Positive | PC 36:3; [M+H] <sup>+</sup> ; GPCho(16:0/20:3(8Z,11Z,14Z))                    | 706.5412 |
| Positive | PC 36:3; [M+H] <sup>+</sup> ; GPCho(18:0/18:3(6Z,9Z,12Z))                     | 722.6657 |
| Positive | PC 36:3; [M+H] <sup>+</sup> ; GPCho(18:1(11E)/18:2(2E,4E))                    | 722.6722 |
| Positive | PC 36:4; [M+H] <sup>+</sup> ; GPCho(12:0/24:4(5Z,8Z,11Z,14Z))                 | 722.6618 |
| Positive | PC 36:4; [M+H] <sup>+</sup> ; GPCho(18:2(2E,4E)/18:2(2E,4E))                  | 722.6699 |
| Positive | PC 36:4; [M+Na] <sup>+</sup> ; GPCho(12:0/24:4(5Z,8Z,11Z,14Z))                | 720.6484 |
| Positive | PC 36:4; [M+Na] <sup>+</sup> ; GPCho(16:0/20:4(5E,8E,11E,14E))                | 716.6183 |
| Positive | PC 36:4; [M+Na] <sup>+</sup> ; GPCho(18:2(2E,4E)/18:2(2E,4E))                 | 716.6198 |
| Positive | PC 36:6; [M+H] <sup>+</sup> ; GPCho(18:3(6Z,9Z,12Z)/18:3(6Z,9Z,12Z))          | 714.6155 |
| Positive | PC 36:8; [M+H] <sup>+</sup> ; GPCho(18:4(6Z,9Z,12Z,15Z)/18:4(6Z,9Z,12Z,15Z))  | 714.6042 |
| Positive | PC 36:8; [M+Na] <sup>+</sup> ; GPCho(18:4(6Z,9Z,12Z,15Z)/18:4(6Z,9Z,12Z,15Z)) | 702.5427 |
| Positive | PC 37:0; [M+H] <sup>+</sup> ; GPCho(12:0/25:0)                                | 712.5895 |

|          |                                                                               |          |
|----------|-------------------------------------------------------------------------------|----------|
| Positive | PC 37:4; [M+H] <sup>+</sup> ; GPCho(13:0/24:4(5Z,8Z,11Z,14Z))                 | 708.5584 |
| Positive | PC 37:4; [M+H] <sup>+</sup> ; GPCho(17:0/20:4(5E,8E,11E,14E))                 | 708.5545 |
| Positive | PC 37:4; [M+H] <sup>+</sup> ; GPCho(18:4(6Z,9Z,12Z,15Z)/19:0)                 | 738.6973 |
| Positive | PC 37:7; [M+Na] <sup>+</sup> ; GPCho(17:2(9Z,12Z)/20:5(5Z,8Z,11Z,14Z,17Z))    | 736.6833 |
| Positive | PC 38:1; [M+H] <sup>+</sup> ; GPCho(17:1(9Z)/21:0)                            | 754.7283 |
| Positive | PC 38:1; [M+Na] <sup>+</sup> ; GPCho(14:1(9Z)/24:0)                           | 752.7112 |
| Positive | PC 38:1; [M+Na] <sup>+</sup> ; GPCho(18:0/20:1(11E))                          | 752.7122 |
| Positive | PC 38:1; [M+Na] <sup>+</sup> ; GPCho(18:1(11E)/20:0)                          | 750.6951 |
| Positive | PC 38:2; [M+H] <sup>+</sup> ; GPCho(14:1(9Z)/24:1(15Z))                       | 750.6935 |
| Positive | PC 38:2; [M+Na] <sup>+</sup> ; GPCho(18:0/20:2(11Z,14Z))                      | 750.6904 |
| Positive | PC 38:2; [M+Na] <sup>+</sup> ; GPCho(18:2(2E,4E)/20:0)                        | 748.6779 |
| Positive | PC 38:3; [M+H] <sup>+</sup> ; GPCho(16:1(7Z)/22:2(13Z,16Z))                   | 748.6787 |
| Positive | PC 38:3; [M+H] <sup>+</sup> ; GPCho(18:0/20:3(5Z,8Z,11Z))                     | 736.5942 |
| Positive | PC 38:3; [M+H] <sup>+</sup> ; GPCho(18:2(2E,4E)/20:1(11E))                    | 772.6761 |
| Positive | PC 38:3; [M+Na] <sup>+</sup> ; GPCho(18:0/20:3(5Z,8Z,11Z))                    | 468.3071 |
| Positive | PC 38:4; [M+Na] <sup>+</sup> ; GPCho(16:0/22:4(7Z,10Z,13Z,16Z))               | 480.3054 |
| Positive | PC 38:4; [M+Na] <sup>+</sup> ; GPCho(18:0/20:4(5E,8E,11E,14E))                | 496.3745 |
| Positive | PC 38:5; [M+H] <sup>+</sup> ; GPCho(18:1(11E)/20:4(5E,8E,11E,14E))            | 482.3594 |
| Positive | PC 38:5; [M+Na] <sup>+</sup> ; GPCho(18:1(11E)/20:4(5E,8E,11E,14E))           | 494.7734 |
| Positive | PC 38:6; [M+H] <sup>+</sup> ; GPCho(22:6(4Z,7Z,10Z,13Z,16Z,19Z)/16:0)         | 510.3886 |
| Positive | PC 38:6; [M+Na] <sup>+</sup> ; GPCho(18:4(6Z,9Z,12Z,15Z)/20:2(5Z,8Z))         | 508.3746 |
| Positive | PC 38:7; [M+H] <sup>+</sup> ; GPCho(18:2(2E,4E)/20:5(5Z,8Z,11Z,14Z,17Z))      | 506.3597 |
| Positive | PC 38:7; [M+H] <sup>+</sup> ; GPCho(18:3(6Z,9Z,12Z)/20:4(5E,8E,11E,14E))      | 524.3714 |
| Positive | PC 39:0; [M+Na] <sup>+</sup> ; GPCho(13:0/26:0)                               | 522.355  |
| Positive | PC 39:3; [M+H] <sup>+</sup> ; GPCho(18:3(6Z,9Z,12Z)/21:0)                     | 520.34   |
| Positive | PC 39:6; [M+H] <sup>+</sup> ; GPCho(17:1(9Z)/22:5(4Z,7Z,10Z,13Z,16Z))         | 538.4188 |
| Positive | PC 39:8; [M+H] <sup>+</sup> ; GPCho(17:2(9Z,12Z)/22:6(4Z,7Z,10Z,13Z,16Z,19Z)) | 552.4023 |
| Positive | PC 40:0; [M+Na] <sup>+</sup> ; GPCho(16:0/24:0)                               | 536.4062 |
| Positive | PC 40:0; [M+Na] <sup>+</sup> ; GPCho(17:0/23:0)                               | 550.3871 |
| Positive | PC 40:0; [M+Na] <sup>+</sup> ; GPCho(18:0/22:0)                               | 548.3673 |
| Positive | PC 40:1; [M+H] <sup>+</sup> ; GPCho(18:0/22:1(13Z))                           | 546.3993 |
| Positive | PC 40:1; [M+H] <sup>+</sup> ; GPCho(18:1(11E)/22:0)                           | 542.3214 |
| Positive | PC 40:2; [M+Na] <sup>+</sup> ; GPCho(18:1(11E)/22:1(13Z))                     | 566.4521 |
| Positive | PC 40:3; [M+Na] <sup>+</sup> ; GPCho(18:1(11E)/22:2(13Z,16Z))                 | 580.4684 |
| Positive | PC 40:3; [M+Na] <sup>+</sup> ; GPCho(18:2(2E,4E)/22:1(13Z))                   | 578.4112 |
| Positive | PC 40:4; [M+H] <sup>+</sup> ; GPCho(20:2(11Z,14Z)/20:2(11Z,14Z))              | 576.4035 |
| Positive | PC 40:5; [M+H] <sup>+</sup> ; GPCho(18:0/22:5(4Z,7Z,10Z,13Z,16Z))             | 572.3688 |
| Positive | PC 40:5; [M+H] <sup>+</sup> ; GPCho(20:0/20:5(5Z,8Z,11Z,14Z,17Z))             | 570.4638 |
| Positive | PC 40:5; [M+H] <sup>+</sup> ; GPCho(20:2(11Z,14Z)/20:3(5Z,8Z,11Z))            | 568.3351 |
| Positive | PC 40:5; [M+Na] <sup>+</sup> ; GPCho(16:1(7Z)/24:4(5Z,8Z,11Z,14Z))            | 594.4786 |
| Positive | PC 40:5; [M+Na] <sup>+</sup> ; GPCho(20:1(11E)/20:4(5E,8E,11E,14E))           | 608.4965 |



|          |                                                                                   |          |
|----------|-----------------------------------------------------------------------------------|----------|
| Positive | PC 40:6; [M+H] <sup>+</sup> ; GPCho(20:3(5Z,8Z,11Z)/20:3(5Z,8Z,11Z))              | 606.294  |
| Positive | PC 40:6; [M+Na] <sup>+</sup> ; GPCho(18:0/22:6(4Z,7Z,10Z,13Z,16Z,19Z))            | 600.396  |
| Positive | PC 40:7; [M+H] <sup>+</sup> ; GPCho(20:2(11Z,14Z)/20:5(5Z,8Z,11Z,14Z,17Z))        | 622.4785 |
| Positive | PC 40:7; [M+H] <sup>+</sup> ; GPCho(20:3(5Z,8Z,11Z)/20:4(5E,8E,11E,14E))          | 636.4918 |
| Positive | PC 40:7; [M+Na] <sup>+</sup> ; GPCho(18:1(11E)/22:6(4Z,7Z,10Z,13Z,16Z,19Z))       | 634.4623 |
| Positive | PC 40:7; [M+Na] <sup>+</sup> ; GPCho(20:3(5Z,8Z,11Z)/20:4(5E,8E,11E,14E))         | 632.4592 |
| Positive | PC 40:8; [M+H] <sup>+</sup> ; GPCho(20:4(5E,8E,11E,14E)/20:4(5E,8E,11E,14E))      | 504.3021 |
| Positive | PC 40:9; [M+H] <sup>+</sup> ; GPCho(20:4(5E,8E,11E,14E)/20:5(5Z,8Z,11Z,14Z,17Z))  | 394.3509 |
| Positive | PC 41:1; [M+H] <sup>+</sup> ; GPCho(15:0/26:1(5Z))                                | 435.3468 |
| Positive | PC 41:1; [M+H] <sup>+</sup> ; GPCho(19:0/22:1(13Z))                               | 442.2978 |
| Positive | PC 41:1; [M+H] <sup>+</sup> ; GPCho(20:1(11E)/21:0)                               | 537.5433 |
| Positive | PC 41:1; [M+H] <sup>+</sup> ; GPCho(25:0/16:1(7Z))                                | 567.5472 |
| Positive | PC 41:5; [M+H] <sup>+</sup> ; GPCho(17:1(9Z)/24:4(5Z,8Z,11Z,14Z))                 | 621.6254 |
| Positive | PC 41:5; [M+H] <sup>+</sup> ; GPCho(19:0/22:5(4Z,7Z,10Z,13Z,16Z))                 | 803.7069 |
| Positive | PC 41:5; [M+H] <sup>+</sup> ; GPCho(20:5(5Z,8Z,11Z,14Z,17Z)/21:0)                 | 820.1469 |
| Positive | PC 41:5; [M+H] <sup>+</sup> ; GPCho(24:4(5Z,8Z,11Z,14Z)/17:1(9Z))                 | 818.1127 |
| Positive | PC 41:6; [M+H] <sup>+</sup> ; GPCho(19:0/22:6(4Z,7Z,10Z,13Z,16Z,19Z))             | 827.7077 |
| Positive | PC 42:0; [M+Na] <sup>+</sup> ; GPCho(16:0/26:0)                                   | 858.0448 |
| Positive | PC 42:0; [M+Na] <sup>+</sup> ; GPCho(20:0/22:0)                                   | 885.9679 |
| Positive | PC 42:0; [M+Na] <sup>+</sup> ; GPCho(21:0/21:0)                                   | 398.3522 |
| Positive | PC 42:1; [M+Na] <sup>+</sup> ; GPCho(16:0/26:1(5Z))                               | 648.6291 |
| Positive | PC 42:3; [M+H] <sup>+</sup> ; GPCho(20:1(11E)/22:2(13Z,16Z))                      | 650.6097 |
| Positive | PC 42:4; [M+H] <sup>+</sup> ; GPCho(18:0/24:4(5Z,8Z,11Z,14Z))                     | 676.6583 |
| Positive | PC 42:4; [M+H] <sup>+</sup> ; GPCho(20:4(5E,8E,11E,14E)/22:0)                     | 678.6738 |
| Positive | PC 42:5; [M+H] <sup>+</sup> ; GPCho(18:1(11E)/24:4(5Z,8Z,11Z,14Z))                | 642.5925 |
| Positive | PC 42:5; [M+H] <sup>+</sup> ; GPCho(20:1(11E)/22:4(7Z,10Z,13Z,16Z))               | 644.5943 |
| Positive | PC 42:6; [M+H] <sup>+</sup> ; GPCho(18:2(2E,4E)/24:4(5Z,8Z,11Z,14Z))              | 564.5323 |
| Positive | PC 42:8; [M+H] <sup>+</sup> ; GPCho(18:4(6Z,9Z,12Z,15Z)/24:4(5Z,8Z,11Z,14Z))      | 566.5493 |
| Positive | PC 42:8; [M+H] <sup>+</sup> ; GPCho(20:2(11Z,14Z)/22:6(4Z,7Z,10Z,13Z,16Z,19Z))    | 622.6137 |
| Positive | PC 42:9; [M+H] <sup>+</sup> ; GPCho(20:3(5Z,8Z,11Z)/22:6(4Z,7Z,10Z,13Z,16Z,19Z))  | 624.6319 |
| Positive | PC 42:9; [M+H] <sup>+</sup> ; GPCho(20:3(8Z,11Z,14Z)/22:6(4Z,7Z,10Z,13Z,16Z,19Z)) | 482.4544 |
| Positive | PC 42:9; [M+H] <sup>+</sup> ; GPCho(20:4(5E,8E,11E,14E)/22:5(4Z,7Z,10Z,13Z,16Z))  | 594.5787 |
| Positive | PC 42:9; [M+H] <sup>+</sup> ; GPCho(20:5(5Z,8Z,11Z,14Z,17Z)/22:4(7Z,10Z,13Z,16Z)) | 596.5925 |
| Positive | PC 43:1; [M+Na] <sup>+</sup> ; GPCho(18:1(11E)/25:0)                              | 678.6748 |
| Positive | PC 43:1; [M+Na] <sup>+</sup> ; GPCho(19:0/24:1(15Z))                              | 680.6904 |
| Positive | PC 43:1; [M+Na] <sup>+</sup> ; GPCho(26:1(5Z)/17:0)                               | 538.5199 |
| Positive | PC 43:4; [M+H] <sup>+</sup> ; GPCho(17:2(9Z,12Z)/26:2(5E,9Z))                     | 540.5307 |
| Positive | PC 43:5; [M+H] <sup>+</sup> ; GPCho(20:5(5Z,8Z,11Z,14Z,17Z)/23:0)                 | 566.5524 |
| Positive | PC 43:6; [M+H] <sup>+</sup> ; GPCho(21:0/22:6(4Z,7Z,10Z,13Z,16Z,19Z))             | 568.571  |
| Positive | PC 44:0; [M+Na] <sup>+</sup> ; GPCho(26:0/18:0)                                   | 650.6413 |
| Positive | PC 44:1; [M+H] <sup>+</sup> ; GPCho(20:0/24:1(15Z))                               | 652.659  |

|          |                                                                                               |          |
|----------|-----------------------------------------------------------------------------------------------|----------|
| Positive | PC 44:12; [M+H] <sup>+</sup> ; GPCho(22:6(4Z,7Z,10Z,13Z,16Z,19Z)/22:6(4Z,7Z,10Z,13Z,16Z,19Z)) | 510.486  |
| Positive | PC 44:2; [M+H] <sup>+</sup> ; GPCho(22:1(13Z)/22:1(13Z))                                      | 512.5021 |
| Positive | PC 44:3; [M+H] <sup>+</sup> ; GPCho(18:3(6Z,9Z,12Z)/26:0)                                     | 508.5315 |
| Positive | PC 44:4; [M+H] <sup>+</sup> ; GPCho(18:4(6Z,9Z,12Z,15Z)/26:0)                                 | 565.3653 |
| Positive | PC 44:4; [M+H] <sup>+</sup> ; GPCho(20:4(5E,8E,11E,14E)/24:0)                                 | 646.647  |
| Positive | PC 44:4; [M+H] <sup>+</sup> ; GPCho(22:2(13Z,16Z)/22:2(13Z,16Z))                              | 734.5267 |
| Positive | PC 44:8; [M+Na] <sup>+</sup> ; GPCho(22:4(7Z,10Z,13Z,16Z)/22:4(7Z,10Z,13Z,16Z))               | 750.6614 |
| Positive | PC 45:4; [M+H] <sup>+</sup> ; GPCho(20:4(5E,8E,11E,14E)/25:0)                                 | 874.0643 |
| Positive | PC 45:4; [M+H] <sup>+</sup> ; GPCho(22:4(7Z,10Z,13Z,16Z)/23:0)                                | 496.3384 |
| Positive | PE 15:0; [M+H] <sup>+</sup> ; GPEtn(11:0/4:0)                                                 | 530.3562 |
| Positive | PE 15:0; [M+H] <sup>+</sup> ; GPEtn(12:0/3:0)                                                 | 550.3796 |
| Positive | PE 15:0; [M+H] <sup>+</sup> ; GPEtn(2:0/13:0)                                                 | 566.3217 |
| Positive | PE 15:0; [M+H] <sup>+</sup> ; GPEtn(3:0/12:0)                                                 | 566.3212 |
| Positive | PE 15:0; [M+H] <sup>+</sup> ; GPEtn(4:0/11:0)                                                 | 566.3444 |
| Positive | PE 15:0; [M+H] <sup>+</sup> ; GPEtn(5:0/10:0)                                                 | 594.3503 |
| Positive | PE 15:0; [M+H] <sup>+</sup> ; GPEtn(6:0/9:0)                                                  | 658.4758 |
| Positive | PE 16:0; [M+H] <sup>+</sup> ; GPEtn(3:0/13:0)                                                 | 658.2282 |
| Positive | PE 17:0; [M+H] <sup>+</sup> ; GPEtn(3:0/14:0)                                                 | 672.4188 |
| Positive | PE 17:0; [M+H] <sup>+</sup> ; GPEtn(4:0/13:0)                                                 | 672.5249 |
| Positive | PE 17:0; [M+H] <sup>+</sup> ; GPEtn(7:0/10:0)                                                 | 672.4159 |
| Positive | PE 17:1; [M+H] <sup>+</sup> ; GPEtn(2:0/15:1(9Z))                                             | 672.5234 |
| Positive | PE 17:1; [M+H] <sup>+</sup> ; GPEtn(3:0/14:1(9Z))                                             | 668.3923 |
| Positive | PE 19:0; [M+H] <sup>+</sup> ; GPEtn(9:0/10:0)                                                 | 662.4013 |
| Positive | PE 20:0; [M+H] <sup>+</sup> ; GPEtn(4:0/16:0)                                                 | 684.4212 |
| Positive | PE 31:0; [M+H] <sup>+</sup> ; GPEtn(11:0/20:0)                                                | 659.2864 |
| Positive | PE 31:0; [M+H] <sup>+</sup> ; GPEtn(15:0/16:0)                                                | 658.401  |
| Positive | PE 31:0; [M+H] <sup>+</sup> ; GPEtn(9:0/22:0)                                                 | 680.4597 |
| Positive | PE 33:0; [M+H] <sup>+</sup> ; GPEtn(11:0/22:0)                                                | 679.5415 |
| Positive | PE 33:0; [M+H] <sup>+</sup> ; GPEtn(16:0/17:0)                                                | 700.4889 |
| Positive | PE 33:0; [M+H] <sup>+</sup> ; GPEtn(9:0/24:0)                                                 | 700.4909 |
| Positive | PE 33:1; [M+H] <sup>+</sup> ; GPEtn(15:0/18:1(11E))                                           | 700.4864 |
| Positive | PE 33:1; [M+H] <sup>+</sup> ; GPEtn(16:0/17:1(9Z))                                            | 700.4892 |
| Positive | PE 34:0; [M+H] <sup>+</sup> ; GPEtn(11:0/23:0)                                                | 672.4211 |
| Positive | PE 34:0; [M+H] <sup>+</sup> ; GPEtn(16:0/18:0)                                                | 672.524  |
| Positive | PE 34:0; [M+H] <sup>+</sup> ; GPEtn(9:0/25:0)                                                 | 672.4208 |
| Positive | PE 34:1; [M+H] <sup>+</sup> ; GPEtn(16:0/18:1(11E))                                           | 714.5051 |
| Positive | PE 34:2; [M+H] <sup>+</sup> ; GPEtn(16:0/18:2(2E,4E))                                         | 714.5023 |
| Positive | PE 34:2; [M+H] <sup>+</sup> ; GPEtn(16:1(7Z)/18:1(11E))                                       | 689.5555 |
| Positive | PE 34:2; [M+Na] <sup>+</sup> ; GPEtn(16:0/18:2(2E,4E))                                        | 710.4336 |
| Positive | PE 34:3; [M+H] <sup>+</sup> ; GPEtn(16:0/18:3(6Z,9Z,12Z))                                     | 706.4791 |
| Positive | PE 34:3; [M+H] <sup>+</sup> ; GPEtn(17:1(9Z)/17:2(9Z,12Z))                                    | 706.483  |

|          |                                                                                  |          |
|----------|----------------------------------------------------------------------------------|----------|
| Positive | PE 35:0; [M+H] <sup>+</sup> ; GPETn(10:0/25:0)                                   | 702.4719 |
| Positive | PE 35:0; [M+H] <sup>+</sup> ; GPETn(16:0/19:0)                                   | 728.5902 |
| Positive | PE 35:0; [M+H] <sup>+</sup> ; GPETn(9:0/26:0)                                    | 728.5202 |
| Positive | PE 35:1; [M+H] <sup>+</sup> ; GPETn(17:0/18:1(11E))                              | 728.516  |
| Positive | PE 35:2; [M+H] <sup>+</sup> ; GPETn(13:0/22:2(13Z,16Z))                          | 729.2721 |
| Positive | PE 35:2; [M+H] <sup>+</sup> ; GPETn(17:0/18:2(2E,4E))                            | 728.5205 |
| Positive | PE 35:2; [M+H] <sup>+</sup> ; GPETn(17:1(9Z)/18:1(11E))                          | 726.5974 |
| Positive | PE 35:2; [M+H] <sup>+</sup> ; GPETn(22:2(13Z,16Z)/13:0)                          | 726.5873 |
| Positive | PE 35:2; [M+H] <sup>+</sup> ; GPETn(9:0/26:2(5E,9Z))                             | 726.4978 |
| Positive | PE 36:1; [M+H] <sup>+</sup> ; GPETn(18:0/18:1(11E))                              | 726.5001 |
| Positive | PE 36:1; [M+Na] <sup>+</sup> ; GPETn(18:0/18:1(11E))                             | 726.5004 |
| Positive | PE 36:2; [M+H] <sup>+</sup> ; GPETn(18:0/18:2(2E,4E))                            | 726.0581 |
| Positive | PE 36:2; [M+H] <sup>+</sup> ; GPETn(18:1(11E)/18:1(11E))                         | 726.5085 |
| Positive | PE 36:2; [M+Na] <sup>+</sup> ; GPETn(18:0/18:2(2E,4E))                           | 726.589  |
| Positive | PE 36:2; [M+Na] <sup>+</sup> ; GPETn(18:1(11E)/18:1(11E))                        | 724.4856 |
| Positive | PE 36:3; [M+H] <sup>+</sup> ; GPETn(16:0/20:3(5Z,8Z,11Z))                        | 700.4753 |
| Positive | PE 36:3; [M+H] <sup>+</sup> ; GPETn(18:1(11E)/18:2(2E,4E))                       | 698.4319 |
| Positive | PE 36:4; [M+H] <sup>+</sup> ; GPETn(16:0/20:4(5E,8E,11E,14E))                    | 698.5061 |
| Positive | PE 36:5; [M+H] <sup>+</sup> ; GPETn(16:1(7Z)/20:4(5E,8E,11E,14E))                | 742.2317 |
| Positive | PE 37:2; [M+H] <sup>+</sup> ; GPETn(11:0/26:2(5E,9Z))                            | 742.5709 |
| Positive | PE 37:3; [M+H] <sup>+</sup> ; GPETn(18:3(6Z,9Z,12Z)/19:0)                        | 742.2541 |
| Positive | PE 37:4; [M+H] <sup>+</sup> ; GPETn(17:0/20:4(5E,8E,11E,14E))                    | 742.204  |
| Positive | PE 37:5; [M+H] <sup>+</sup> ; GPETn(17:1(9Z)/20:4(5E,8E,11E,14E))                | 714.5045 |
| Positive | PE 37:5; [M+Na] <sup>+</sup> ; GPETn(17:1(9Z)/20:4(5E,8E,11E,14E))               | 735.7444 |
| Positive | PE 38:4; [M+H] <sup>+</sup> ; GPETn(18:0/20:4(5E,8E,11E,14E))                    | 732.4751 |
| Positive | PE 38:4; [M+Na] <sup>+</sup> ; GPETn(18:0/20:4(5E,8E,11E,14E))                   | 732.4665 |
| Positive | PE 38:6; [M+H] <sup>+</sup> ; GPETn(16:0/22:6(4Z,7Z,10Z,13Z,16Z,19Z))            | 733.5139 |
| Positive | PE 38:6; [M+H] <sup>+</sup> ; GPETn(18:2(2E,4E)/20:4(5E,8E,11E,14E))             | 708.4865 |
| Positive | PE 39:2; [M+H] <sup>+</sup> ; GPETn(13:0/26:2(5E,9Z))                            | 730.4794 |
| Positive | PE 39:2; [M+Na] <sup>+</sup> ; GPETn(22:1(13Z)/17:1(9Z))                         | 734.5008 |
| Positive | PE 40:2; [M+H] <sup>+</sup> ; GPETn(18:1(11E)/22:1(13Z))                         | 756.5501 |
| Positive | PE 40:6; [M+H] <sup>+</sup> ; GPETn(18:0/22:6(4Z,7Z,10Z,13Z,16Z,19Z))            | 756.5521 |
| Positive | PE 40:7; [M+H] <sup>+</sup> ; GPETn(18:1(11E)/22:6(4Z,7Z,10Z,13Z,16Z,19Z))       | 756.5517 |
| Positive | PE 40:9; [M+H] <sup>+</sup> ; GPETn(18:4(6Z,9Z,12Z,15Z)/22:5(4Z,7Z,10Z,13Z,16Z)) | 756.5528 |
| Positive | PE 41:2; [M+H] <sup>+</sup> ; GPETn(18:2(2E,4E)/23:0)                            | 756.5536 |
| Positive | PE 41:3; [M+Na] <sup>+</sup> ; GPETn(15:1(9Z)/26:2(5Z,9E))                       | 756.5489 |
| Positive | PE 41:3; [M+Na] <sup>+</sup> ; GPETn(17:2(9Z,12Z)/24:1(15Z))                     | 756.553  |
| Positive | PE 41:4; [M+Na] <sup>+</sup> ; GPETn(19:0/22:4(7Z,10Z,13Z,16Z))                  | 756.5555 |
| Positive | PE 41:4; [M+Na] <sup>+</sup> ; GPETn(20:4(5E,8E,11E,14E)/21:0)                   | 756.5498 |
| Positive | PE 43:6; [M+Na] <sup>+</sup> ; GPETn(21:0/22:6(4Z,7Z,10Z,13Z,16Z,19Z))           | 756.5517 |
| Positive | PE 44:4; [M+H] <sup>+</sup> ; GPETn(18:2(2E,4E)/26:2(5E,9Z))                     | 732.4944 |

|          |                                                                                |          |
|----------|--------------------------------------------------------------------------------|----------|
| Positive | PE 46:4; [M+H] <sup>+</sup> ; GPETn(20:2(11Z,14Z)/26:2(5E,9Z))                 | 732.4944 |
| Positive | plasmenyl-PC 18:0; [M+Na] <sup>+</sup> ; PC(P-16:0/2:0)                        | 753.6945 |
| Positive | plasmenyl-PC 35:0; [M+Na] <sup>+</sup> ; PC(P-16:0/19:0)                       | 754.5413 |
| Positive | plasmenyl-PC 36:0; [M+Na] <sup>+</sup> ; PC(P-16:0/20:0)                       | 754.5348 |
| Positive | plasmenyl-PC 36:4; [M+Na] <sup>+</sup> ; PC(P-16:0/20:4(5E,8E,11E,14E))        | 752.5226 |
| Positive | plasmenyl-PC 38:0; [M+Na] <sup>+</sup> ; PC(P-16:0/22:0)                       | 752.5199 |
| Positive | plasmenyl-PC 38:1; [M+Na] <sup>+</sup> ; PC(P-16:0/22:1(13Z))                  | 728.5228 |
| Positive | plasmenyl-PC 38:4; [M+Na] <sup>+</sup> ; PC(P-18:0/20:4(5E,8E,11E,14E))        | 727.5757 |
| Positive | plasmenyl-PC 39:0; [M+Na] <sup>+</sup> ; PC(P-20:0/19:0)                       | 726.5351 |
| Positive | plasmenyl-PC 40:0; [M+Na] <sup>+</sup> ; PC(P-16:0/24:0)                       | 726.5451 |
| Positive | plasmenyl-PC 42:1; [M+Na] <sup>+</sup> ; PC(P-18:0/24:1(15Z))                  | 724.5346 |
| Positive | plasmenyl-PC 42:2; [M+Na] <sup>+</sup> ; PC(P-20:0/22:2(13Z,16Z))              | 722.4689 |
| Positive | plasmenyl-PC 43:0; [M+Na] <sup>+</sup> ; PC(P-20:0/23:0)                       | 770.5365 |
| Positive | plasmenyl-PE 34:0; [M+Na] <sup>+</sup> ; PE(P-18:0/16:0)                       | 770.5308 |
| Positive | plasmenyl-PE 34:1; [M+H] <sup>+</sup> ; PE(P-16:0/18:1(11E))                   | 770.5219 |
| Positive | plasmenyl-PE 34:1; [M+Na] <sup>+</sup> ; PE(P-16:0/18:1(11E))                  | 744.5582 |
| Positive | plasmenyl-PE 36:1; [M+Na] <sup>+</sup> ; PE(P-18:0/18:1(11E))                  | 766.5699 |
| Positive | plasmenyl-PE 36:3; [M+H] <sup>+</sup> ; PE(P-18:0/18:3(6Z,9Z,12Z))             | 742.2295 |
| Positive | plasmenyl-PE 36:4; [M+H] <sup>+</sup> ; PE(P-16:0/20:4(5E,8E,11E,14E))         | 742.2217 |
| Positive | plasmenyl-PE 36:5; [M+H] <sup>+</sup> ; PE(P-16:0/20:5(5Z,8Z,11Z,14Z,17Z))     | 740.2456 |
| Positive | plasmenyl-PE 38:1; [M+H] <sup>+</sup> ; PE(P-18:0/20:1(11E))                   | 737.5737 |
| Positive | plasmenyl-PE 38:1; [M+Na] <sup>+</sup> ; PE(P-16:0/22:1(13Z))                  | 762.5263 |
| Positive | plasmenyl-PE 38:1; [M+Na] <sup>+</sup> ; PE(P-18:0/20:1(11E))                  | 784.578  |
| Positive | plasmenyl-PE 38:1; [M+Na] <sup>+</sup> ; PE(P-20:0/18:1(11E))                  | 784.5846 |
| Positive | plasmenyl-PE 38:2; [M+Na] <sup>+</sup> ; PE(P-20:0/18:2(2E,4E))                | 784.5823 |
| Positive | plasmenyl-PE 38:3; [M+H] <sup>+</sup> ; PE(P-18:0/20:3(5Z,8Z,11Z))             | 784.5819 |
| Positive | plasmenyl-PE 38:3; [M+Na] <sup>+</sup> ; PE(P-18:0/20:3(5Z,8Z,11Z))            | 785.1752 |
| Positive | plasmenyl-PE 38:4; [M+H] <sup>+</sup> ; PE(P-16:0/22:4(7Z,10Z,13Z,16Z))        | 784.5797 |
| Positive | plasmenyl-PE 38:4; [M+H] <sup>+</sup> ; PE(P-18:0/20:4(5E,8E,11E,14E))         | 783.5877 |
| Positive | plasmenyl-PE 38:4; [M+Na] <sup>+</sup> ; PE(P-18:0/20:4(5E,8E,11E,14E))        | 782.569  |
| Positive | plasmenyl-PE 38:5; [M+H] <sup>+</sup> ; PE(P-16:0/22:5(4Z,7Z,10Z,13Z,16Z))     | 780.392  |
| Positive | plasmenyl-PE 38:5; [M+H] <sup>+</sup> ; PE(P-18:0/20:5(5Z,8Z,11Z,14Z,17Z))     | 780.552  |
| Positive | plasmenyl-PE 38:6; [M+H] <sup>+</sup> ; PE(P-16:0/22:6(4Z,7Z,10Z,13Z,16Z,19Z)) | 781.0598 |
| Positive | plasmenyl-PE 40:1; [M+Na] <sup>+</sup> ; PE(P-18:0/22:1(13Z))                  | 756.5506 |
| Positive | plasmenyl-PE 40:1; [M+Na] <sup>+</sup> ; PE(P-20:0/20:1(11E))                  | 756.5502 |
| Positive | plasmenyl-PE 40:2; [M+Na] <sup>+</sup> ; PE(P-18:0/22:2(13Z,16Z))              | 778.5308 |
| Positive | plasmenyl-PE 40:3; [M+H] <sup>+</sup> ; PE(P-20:0/20:3(5Z,8Z,11Z))             | 754.5371 |
| Positive | plasmenyl-PE 40:4; [M+H] <sup>+</sup> ; PE(P-18:0/22:4(7Z,10Z,13Z,16Z))        | 754.1582 |
| Positive | plasmenyl-PE 40:4; [M+H] <sup>+</sup> ; PE(P-20:0/20:4(5E,8E,11E,14E))         | 755.6038 |
| Positive | plasmenyl-PE 40:5; [M+H] <sup>+</sup> ; PE(P-18:0/22:5(4Z,7Z,10Z,13Z,16Z))     | 776.5196 |
| Positive | plasmenyl-PE 40:6; [M+H] <sup>+</sup> ; PE(P-18:0/22:6(4Z,7Z,10Z,13Z,16Z,19Z)) | 776.519  |

|          |                                                                          |          |
|----------|--------------------------------------------------------------------------|----------|
| Positive | plasmenyl-PE 42:1; [M+Na] <sup>+</sup> ; PE(P-16:0/26:1(5Z))             | 776.5233 |
| Positive | plasmenyl-PE 42:2; [M+Na] <sup>+</sup> ; PE(P-16:0/26:2(5E,9Z))          | 752.3802 |
| Positive | plasmenyl-PE 42:2; [M+Na] <sup>+</sup> ; PE(P-20:0/22:2(13Z,16Z))        | 752.5216 |
| Positive | plasmenyl-PE 42:4; [M+H] <sup>+</sup> ; PE(P-18:0/24:4(5Z,8Z,11Z,14Z))   | 752.3683 |
| Positive | PS 42:7; [M+H] <sup>+</sup> ; GPSer(18:3(6Z,9Z,12Z)/24:4(5Z,8Z,11Z,14Z)) | 752.5172 |
| Positive | SM 32:0; [M] <sup>+</sup> ; SM(d14:0/18:0)                               | 750.524  |
| Positive | SM 35:0; [M+Na] <sup>+</sup> ; SM(d15:0/20:0)                            | 750.5116 |
| Positive | SM 36:2; [M+Na] <sup>+</sup> ; SM(d18:1(4E)/18:1(9Z))                    | 776.5263 |
| Positive | SM 38:0; [M+Na] <sup>+</sup> ; SM(d14:0/24:0)                            | 776.5216 |
| Positive | SM 38:1; [M] <sup>+</sup> ; SM(d14:0/24:1(15Z))                          | 799.5251 |
| Positive | SM 39:0; [M] <sup>+</sup> ; SM(d15:0/24:0)                               | 796.5412 |
| Positive | SM 39:0; [M+Na] <sup>+</sup> ; SM(d15:0/24:0)                            | 773.6823 |
| Positive | SM 39:1; [M+Na] <sup>+</sup> ; SM(d15:0/24:1(15Z))                       | 768.5478 |
| Positive | SM 39:4; [M+Na] <sup>+</sup> ; SM(d15:0/24:4(5Z,8Z,11Z,14Z))             | 766.1261 |
| Positive | SM 40:0; [M] <sup>+</sup> ; SM(d14:0/26:0)                               | 766.1301 |
| Positive | SM 40:0; [M+Na] <sup>+</sup> ; SM(d14:0/26:0)                            | 788.5575 |
| Positive | SM 40:1; [M] <sup>+</sup> ; SM(d14:0/26:1(17Z))                          | 788.5167 |
| Positive | SM 40:1; [M+Na] <sup>+</sup> ; SM(d14:0/26:1(17Z))                       | 788.5577 |
| Positive | SM 41:0; [M+Na] <sup>+</sup> ; SM(d15:0/26:0)                            | 788.5568 |
| Positive | SM 41:1; [M+Na] <sup>+</sup> ; SM(d15:0/26:1(17Z))                       | 764.1585 |
| Positive | SM 41:2; [M+Na] <sup>+</sup> ; SM(d15:1(4E)/26:1(17Z))                   | 792.2082 |
| Positive | SM 41:5; [M] <sup>+</sup> ; SM(d17:1(4E)/24:4(5Z,8Z,11Z,14Z))            | 789.6591 |
| Positive | SM 42:0; [M+Na] <sup>+</sup> ; SM(d16:0/26:0)                            | 788.1871 |
| Positive | SM 42:1; [M] <sup>+</sup> ; SM(d16:0/26:1(17Z))                          | 789.5939 |
| Positive | SM 42:1; [M+Na] <sup>+</sup> ; SM(d16:0/26:1(17Z))                       | 811.1008 |
| Positive | SM 42:2; [M] <sup>+</sup> ; SM(d16:1(4E)/26:1(17Z))                      | 811.0844 |
| Positive | SM 42:2; [M+Na] <sup>+</sup> ; SM(d16:1(4E)/26:1(17Z))                   | 811.107  |
| Positive | SM 43:0; [M+Na] <sup>+</sup> ; SM(d17:0/26:0)                            | 810.6007 |
| Positive | SM 43:1; [M+Na] <sup>+</sup> ; SM(d17:0/26:1(17Z))                       | 786.601  |
| Positive | SM 43:2; [M] <sup>+</sup> ; SM(d17:1(4E)/26:1(17Z))                      | 808.5834 |
| Positive | SM 43:2; [M+Na] <sup>+</sup> ; SM(d17:1(4E)/26:1(17Z))                   | 808.5883 |
| Positive | SM 43:5; [M] <sup>+</sup> ; SM(d19:1(4E)/24:4(5Z,8Z,11Z,14Z))            | 784.5816 |
| Positive | SM 44:0; [M+Na] <sup>+</sup> ; SM(d18:0/26:0)                            | 784.5851 |
| Positive | SM 44:2; [M+Na] <sup>+</sup> ; SM(d18:1(4E)/26:1(17Z))                   | 784.5809 |
| Positive | SM 45:0; [M+Na] <sup>+</sup> ; SM(d19:0/26:0)                            | 784.5848 |
| Positive | SM 45:1; [M+Na] <sup>+</sup> ; SM(d19:0/26:1(17Z))                       | 783.6346 |
| Positive | SM 45:2; [M] <sup>+</sup> ; SM(d19:1(4E)/26:1(17Z))                      | 782.5997 |
| Positive | TG 40:0; [M+Na] <sup>+</sup> ; TG(12:0/12:0/16:0)                        | 804.5508 |
| Positive | TG 40:0; [M+NH <sub>4</sub> ] <sup>+</sup> ; TG(12:0/12:0/16:0)          | 804.5512 |
| Positive | TG 40:1; [M+NH <sub>4</sub> ] <sup>+</sup> ; TG(12:0/12:0/16:1)          | 804.5516 |
| Positive | TG 42:0; [M+NH <sub>4</sub> ] <sup>+</sup> ; TG(12:0/12:0/18:0)          | 780.0974 |

|          |                                                    |          |
|----------|----------------------------------------------------|----------|
| Positive | TG 42:0; [M+NH4] <sup>+</sup> ; TG(12:0/14:0/16:0) | 780.4064 |
| Positive | TG 42:1; [M+NH4] <sup>+</sup> ; TG(12:0/12:0/18:1) | 781.0773 |
| Positive | TG 42:2; [M+NH4] <sup>+</sup> ; TG(12:0/14:1/16:1) | 780.3938 |
| Positive | TG 44:1; [M+Na] <sup>+</sup> ; TG(12:0/16:1/16:0)  | 780.0932 |
| Positive | TG 44:1; [M+Na] <sup>+</sup> ; TG(14:0/16:1/14:0)  | 802.5289 |
| Positive | TG 44:1; [M+NH4] <sup>+</sup> ; TG(12:0/16:1/16:0) | 802.5403 |
| Positive | TG 44:2; [M+Na] <sup>+</sup> ; TG(12:0/14:1/18:1)  | 802.5372 |
| Positive | TG 44:2; [M+NH4] <sup>+</sup> ; TG(12:0/14:1/18:1) | 802.5461 |
| Positive | TG 46:0; [M+Na] <sup>+</sup> ; TG(12:0/16:0/18:0)  | 778.5356 |
| Positive | TG 46:0; [M+Na] <sup>+</sup> ; TG(14:0/16:0/16:0)  | 776.5185 |
| Positive | TG 46:0; [M+NH4] <sup>+</sup> ; TG(12:0/16:0/18:0) | 776.5241 |
| Positive | TG 46:0; [M+NH4] <sup>+</sup> ; TG(14:0/16:0/16:0) | 774.5698 |
| Positive | TG 46:1; [M+Na] <sup>+</sup> ; TG(14:0/16:0/16:1)  | 796.5358 |
| Positive | TG 46:1; [M+NH4] <sup>+</sup> ; TG(14:0/16:0/16:1) | 805.5473 |
| Positive | TG 46:2; [M+Na] <sup>+</sup> ; TG(12:0/18:1/16:1)  | 824.6059 |
| Positive | TG 46:2; [M+NH4] <sup>+</sup> ; TG(12:0/18:1/16:1) | 820.5393 |
| Positive | TG 46:3; [M+NH4] <sup>+</sup> ; TG(14:1/16:1/16:1) | 796.5451 |
| Positive | TG 48:0; [M+Na] <sup>+</sup> ; TG(14:0/16:0/18:0)  | 796.5383 |
| Positive | TG 48:0; [M+NH4] <sup>+</sup> ; TG(14:0/16:0/18:0) | 796.543  |
| Positive | TG 48:1; [M+Li] <sup>+</sup> ; TG(14:0/16:0/18:1)  | 794.531  |
| Positive | TG 48:1; [M+Na] <sup>+</sup> ; TG(14:0/16:0/18:1)  | 794.5362 |
| Positive | TG 48:1; [M+Na] <sup>+</sup> ; TG(14:0/16:1/18:0)  | 794.5213 |
| Positive | TG 48:1; [M+Na] <sup>+</sup> ; TG(16:0/16:0/16:1)  | 813.705  |
| Positive | TG 48:1; [M+NH4] <sup>+</sup> ; TG(14:0/16:0/18:1) | 840.7337 |
| Positive | TG 48:1; [M+NH4] <sup>+</sup> ; TG(14:0/16:1/18:0) | 840.734  |
| Positive | TG 48:1; [M+NH4] <sup>+</sup> ; TG(16:0/16:0/16:1) | 816.5815 |
| Positive | TG 48:2; [M+Na] <sup>+</sup> ; TG(14:0/16:1/18:1)  | 818.1327 |
| Positive | TG 48:2; [M+Na] <sup>+</sup> ; TG(16:0/16:1/16:1)  | 838.1831 |
| Positive | TG 48:2; [M+NH4] <sup>+</sup> ; TG(14:0/16:1/18:1) | 838.6284 |
| Positive | TG 48:2; [M+NH4] <sup>+</sup> ; TG(16:0/16:1/16:1) | 838.7353 |
| Positive | TG 48:3; [M+Na] <sup>+</sup> ; TG(14:1/16:1/18:1)  | 838.7284 |
| Positive | TG 48:3; [M+NH4] <sup>+</sup> ; TG(14:1/16:1/18:1) | 838.184  |
| Positive | TG 49:0; [M+Na] <sup>+</sup> ; TG(16:0/16:0/17:0)  | 838.6301 |
| Positive | TG 49:1; [M+Na] <sup>+</sup> ; TG(16:0/16:0/17:1)  | 838.6249 |
| Positive | TG 49:1; [M+Na] <sup>+</sup> ; TG(16:0/16:1/17:0)  | 838.7229 |
| Positive | TG 49:1; [M+NH4] <sup>+</sup> ; TG(16:0/16:0/17:1) | 813.6957 |
| Positive | TG 49:2; [M+NH4] <sup>+</sup> ; TG(16:0/16:0/17:2) | 836.7068 |
| Positive | TG 49:2; [M+NH4] <sup>+</sup> ; TG(16:0/16:1/17:1) | 836.6169 |
| Positive | TG 49:3; [M+Na] <sup>+</sup> ; TG(16:1/16:1/17:1)  | 836.7199 |
| Positive | TG 49:3; [M+NH4] <sup>+</sup> ; TG(16:0/16:1/17:2) | 836.6058 |
| Positive | TG 49:3; [M+NH4] <sup>+</sup> ; TG(16:1/16:1/17:1) | 812.671  |

|          |                                                                 |          |
|----------|-----------------------------------------------------------------|----------|
| Positive | TG 50:0; [M+Na] <sup>+</sup> ; TG(16:0/16:0/18:0)               | 813.6371 |
| Positive | TG 50:0; [M+NH <sub>4</sub> ] <sup>+</sup> ; TG(16:0/16:0/18:0) | 811.6541 |
| Positive | TG 50:1; [M+Na] <sup>+</sup> ; TG(16:0/16:0/18:1)               | 834.5977 |
| Positive | TG 50:1; [M+Na] <sup>+</sup> ; TG(16:0/16:1/18:0)               | 811.1169 |
| Positive | TG 50:1; [M+NH <sub>4</sub> ] <sup>+</sup> ; TG(14:0/18:0/18:1) | 811.1452 |
| Positive | TG 50:1; [M+NH <sub>4</sub> ] <sup>+</sup> ; TG(16:0/17:0/17:1) | 811.1106 |
| Positive | TG 50:2; [M+Na] <sup>+</sup> ; TG(16:0/16:0/18:2)               | 810.08   |
| Positive | TG 50:2; [M+Na] <sup>+</sup> ; TG(16:0/16:1/18:1)               | 811.1266 |
| Positive | TG 50:2; [M+NH <sub>4</sub> ] <sup>+</sup> ; TG(16:0/16:0/18:2) | 811.1013 |
| Positive | TG 50:2; [M+NH <sub>4</sub> ] <sup>+</sup> ; TG(16:0/16:1/18:1) | 811.1394 |
| Positive | TG 50:2; [M+NH <sub>4</sub> ] <sup>+</sup> ; TG(16:0/17:1/17:1) | 811.1182 |
| Positive | TG 50:2; [M+NH <sub>4</sub> ] <sup>+</sup> ; TG(16:1/17:0/17:1) | 810.5347 |
| Positive | TG 50:3; [M+Na] <sup>+</sup> ; TG(16:0/16:0/18:3)               | 832.5797 |
| Positive | TG 50:3; [M+Na] <sup>+</sup> ; TG(16:0/16:1/18:2)               | 832.5835 |
| Positive | TG 50:3; [M+Na] <sup>+</sup> ; TG(16:1/16:1/18:1)               | 809.079  |
| Positive | TG 50:3; [M+NH <sub>4</sub> ] <sup>+</sup> ; TG(16:0/16:1/18:2) | 808.0709 |
| Positive | TG 50:3; [M+NH <sub>4</sub> ] <sup>+</sup> ; TG(16:1/16:1/18:1) | 808.028  |
| Positive | TG 50:3; [M+NH <sub>4</sub> ] <sup>+</sup> ; TG(16:1/17:0/17:2) | 808.0682 |
| Positive | TG 50:3; [M+NH <sub>4</sub> ] <sup>+</sup> ; TG(16:1/17:1/17:1) | 808.5845 |
| Positive | TG 50:4; [M+Na] <sup>+</sup> ; TG(16:0/16:1/18:3)               | 809.0056 |
| Positive | TG 50:4; [M+Na] <sup>+</sup> ; TG(16:1/16:1/18:2)               | 808.0354 |
| Positive | TG 50:4; [M+NH <sub>4</sub> ] <sup>+</sup> ; TG(16:0/16:1/18:3) | 809.0645 |
| Positive | TG 50:4; [M+NH <sub>4</sub> ] <sup>+</sup> ; TG(16:1/16:1/18:2) | 830.5718 |
| Positive | TG 50:5; [M+Na] <sup>+</sup> ; TG(16:1/16:1/18:3)               | 806.0399 |
| Positive | TG 50:5; [M+NH <sub>4</sub> ] <sup>+</sup> ; TG(16:1/16:1/18:3) | 806.0081 |
| Positive | TG 51:0; [M+Na] <sup>+</sup> ; TG(16:0/16:0/19:0)               | 806.0795 |
| Positive | TG 51:0; [M+Na] <sup>+</sup> ; TG(16:0/17:0/18:0)               | 806.0669 |
| Positive | TG 51:0; [M+NH <sub>4</sub> ] <sup>+</sup> ; TG(16:0/16:0/19:0) | 806.5647 |
| Positive | TG 51:1; [M+Na] <sup>+</sup> ; TG(16:0/17:0/18:1)               | 828.5531 |
| Positive | TG 51:1; [M+Na] <sup>+</sup> ; TG(16:0/17:1/18:0)               | 828.5527 |
| Positive | TG 51:1; [M+Na] <sup>+</sup> ; TG(16:1/17:0/18:0)               | 828.5528 |
| Positive | TG 51:1; [M+NH <sub>4</sub> ] <sup>+</sup> ; TG(16:0/16:1/19:0) | 828.5561 |
| Positive | TG 51:1; [M+NH <sub>4</sub> ] <sup>+</sup> ; TG(16:0/17:0/18:1) | 828.546  |
| Positive | TG 51:1; [M+NH <sub>4</sub> ] <sup>+</sup> ; TG(16:0/17:1/18:0) | 828.5506 |
| Positive | TG 51:1; [M+NH <sub>4</sub> ] <sup>+</sup> ; TG(16:1/17:0/18:0) | 829.7657 |
| Positive | TG 51:2; [M+Na] <sup>+</sup> ; TG(17:0/17:1/17:1)               | 804.5481 |
| Positive | TG 51:2; [M+NH <sub>4</sub> ] <sup>+</sup> ; TG(16:0/17:0/18:2) | 804.5445 |
| Positive | TG 51:2; [M+NH <sub>4</sub> ] <sup>+</sup> ; TG(16:0/17:1/18:1) | 804.0146 |
| Positive | TG 51:2; [M+NH <sub>4</sub> ] <sup>+</sup> ; TG(16:1/17:0/18:1) | 802.5965 |
| Positive | TG 51:2; [M+NH <sub>4</sub> ] <sup>+</sup> ; TG(17:0/17:1/17:1) | 802.5697 |
| Positive | TG 51:3; [M+Na] <sup>+</sup> ; TG(17:0/17:1/17:2)               | 802.5364 |

|          |                                                    |          |
|----------|----------------------------------------------------|----------|
| Positive | TG 51:3; [M+NH4] <sup>+</sup> ; TG(16:0/17:2/18:1) | 800.5782 |
| Positive | TG 51:3; [M+NH4] <sup>+</sup> ; TG(16:1/17:1/18:1) | 854.5829 |
| Positive | TG 51:3; [M+NH4] <sup>+</sup> ; TG(17:0/17:1/17:2) | 854.5948 |
| Positive | TG 51:4; [M+Li] <sup>+</sup> ; TG(16:1/17:1/18:2)  | 829.051  |
| Positive | TG 51:4; [M+NH4] <sup>+</sup> ; TG(16:0/17:1/18:3) | 850.6763 |
| Positive | TG 51:4; [M+NH4] <sup>+</sup> ; TG(16:0/17:2/18:2) | 850.6773 |
| Positive | TG 51:4; [M+NH4] <sup>+</sup> ; TG(16:1/17:0/18:3) | 826.634  |
| Positive | TG 51:4; [M+NH4] <sup>+</sup> ; TG(16:1/17:1/18:2) | 826.7076 |
| Positive | TG 51:5; [M+NH4] <sup>+</sup> ; TG(16:1/17:1/18:3) | 822.548  |
| Positive | TG 51:5; [M+NH4] <sup>+</sup> ; TG(16:1/17:2/18:2) | 820.6012 |
| Positive | TG 51:6; [M+NH4] <sup>+</sup> ; TG(16:1/17:2/18:3) | 820.5443 |
| Positive | TG 52:0; [M+Na] <sup>+</sup> ; TG(16:0/16:0/20:0)  | 816.5794 |
| Positive | TG 52:0; [M+Na] <sup>+</sup> ; TG(16:0/18:0/18:0)  | 838.1861 |
| Positive | TG 52:0; [M+NH4] <sup>+</sup> ; TG(16:0/16:0/20:0) | 868.6768 |
| Positive | TG 52:0; [M+NH4] <sup>+</sup> ; TG(16:0/17:0/19:0) | 868.6756 |
| Positive | TG 52:0; [M+NH4] <sup>+</sup> ; TG(16:0/18:0/18:0) | 868.6776 |
| Positive | TG 52:0; [M+NH4] <sup>+</sup> ; TG(17:0/17:0/18:0) | 844.6529 |
| Positive | TG 52:1; [M+Na] <sup>+</sup> ; TG(16:0/18:0/18:1)  | 844.679  |
| Positive | TG 52:1; [M+NH4] <sup>+</sup> ; TG(16:0/16:0/20:1) | 866.668  |
| Positive | TG 52:1; [M+NH4] <sup>+</sup> ; TG(16:0/16:1/20:0) | 866.6549 |
| Positive | TG 52:1; [M+NH4] <sup>+</sup> ; TG(16:0/17:1/19:0) | 866.6586 |
| Positive | TG 52:1; [M+NH4] <sup>+</sup> ; TG(16:0/18:0/18:1) | 866.6616 |
| Positive | TG 52:1; [M+NH4] <sup>+</sup> ; TG(17:0/17:0/18:1) | 866.6662 |
| Positive | TG 52:2; [M+Na] <sup>+</sup> ; TG(16:0/18:0/18:2)  | 826.5373 |
| Positive | TG 52:2; [M+Na] <sup>+</sup> ; TG(16:0/18:1/18:1)  | 848.5569 |
| Positive | TG 52:2; [M+Na] <sup>+</sup> ; TG(16:1/18:0/18:1)  | 844.0732 |
| Positive | TG 52:2; [M+NH4] <sup>+</sup> ; TG(14:0/18:1/20:1) | 864.5005 |
| Positive | TG 52:2; [M+NH4] <sup>+</sup> ; TG(16:0/16:1/20:1) | 864.6469 |
| Positive | TG 52:2; [M+NH4] <sup>+</sup> ; TG(16:0/18:0/18:2) | 864.4921 |
| Positive | TG 52:2; [M+NH4] <sup>+</sup> ; TG(16:0/18:1/18:1) | 842.0626 |
| Positive | TG 52:2; [M+NH4] <sup>+</sup> ; TG(16:1/17:1/19:0) | 862.6285 |
| Positive | TG 52:2; [M+NH4] <sup>+</sup> ; TG(16:1/18:0/18:1) | 862.6236 |
| Positive | TG 52:3; [M+Na] <sup>+</sup> ; TG(16:0/18:0/18:3)  | 838.6425 |
| Positive | TG 52:3; [M+Na] <sup>+</sup> ; TG(16:0/18:1/18:2)  | 860.6119 |
| Positive | TG 52:3; [M+Na] <sup>+</sup> ; TG(16:1/18:1/18:1)  | 860.6079 |
| Positive | TG 52:3; [M+NH4] <sup>+</sup> ; TG(16:0/16:1/20:2) | 860.6128 |
| Positive | TG 52:3; [M+NH4] <sup>+</sup> ; TG(16:0/18:1/18:2) | 860.6148 |
| Positive | TG 52:3; [M+NH4] <sup>+</sup> ; TG(16:1/18:0/18:2) | 860.6102 |
| Positive | TG 52:3; [M+NH4] <sup>+</sup> ; TG(16:1/18:1/18:1) | 860.6144 |
| Positive | TG 52:3; [M+NH4] <sup>+</sup> ; TG(17:0/17:1/18:2) | 860.6262 |
| Positive | TG 52:3; [M+NH4] <sup>+</sup> ; TG(17:1/17:1/18:1) | 836.4669 |



|          |                                                                 |          |
|----------|-----------------------------------------------------------------|----------|
| Positive | TG 52:4; [M+Na] <sup>+</sup> ; TG(16:0/18:1/18:3)               | 836.614  |
| Positive | TG 52:4; [M+Na] <sup>+</sup> ; TG(16:0/18:2/18:2)               | 836.4628 |
| Positive | TG 52:4; [M+Na] <sup>+</sup> ; TG(16:1/18:1/18:2)               | 836.6147 |
| Positive | TG 52:4; [M+NH <sub>4</sub> ] <sup>+</sup> ; TG(16:0/16:0/20:4) | 836.6055 |
| Positive | TG 52:4; [M+NH <sub>4</sub> ] <sup>+</sup> ; TG(16:0/18:1/18:3) | 858.5959 |
| Positive | TG 52:4; [M+NH <sub>4</sub> ] <sup>+</sup> ; TG(16:0/18:2/18:2) | 858.5977 |
| Positive | TG 52:4; [M+NH <sub>4</sub> ] <sup>+</sup> ; TG(16:1/18:1/18:2) | 834.6745 |
| Positive | TG 52:4; [M+NH <sub>4</sub> ] <sup>+</sup> ; TG(17:1/17:2/18:1) | 856.5814 |
| Positive | TG 52:5; [M+Na] <sup>+</sup> ; TG(16:0/16:1/20:4)               | 856.5894 |
| Positive | TG 52:5; [M+Na] <sup>+</sup> ; TG(16:0/18:2/18:3)               | 832.6523 |
| Positive | TG 52:5; [M+Na] <sup>+</sup> ; TG(16:1/18:1/18:3)               | 832.5854 |
| Positive | TG 52:5; [M+Na] <sup>+</sup> ; TG(16:1/18:2/18:2)               | 832.5842 |
| Positive | TG 52:5; [M+NH <sub>4</sub> ] <sup>+</sup> ; TG(16:0/16:1/20:4) | 854.5691 |
| Positive | TG 52:5; [M+NH <sub>4</sub> ] <sup>+</sup> ; TG(16:0/18:2/18:3) | 854.575  |
| Positive | TG 52:5; [M+NH <sub>4</sub> ] <sup>+</sup> ; TG(16:1/18:1/18:3) | 830.5999 |
| Positive | TG 52:5; [M+NH <sub>4</sub> ] <sup>+</sup> ; TG(16:1/18:2/18:2) | 830.4224 |
| Positive | TG 52:5; [M+NH <sub>4</sub> ] <sup>+</sup> ; TG(17:1/17:2/18:2) | 830.5663 |
| Positive | TG 52:6; [M+Li] <sup>+</sup> ; TG(16:0/18:3/18:3)               | 852.549  |
| Positive | TG 52:6; [M+Na] <sup>+</sup> ; TG(16:0/16:1/20:5)               | 852.5487 |
| Positive | TG 52:6; [M+Na] <sup>+</sup> ; TG(16:0/18:3/18:3)               | 828.6167 |
| Positive | TG 52:6; [M+Na] <sup>+</sup> ; TG(16:1/18:2/18:3)               | 828.6261 |
| Positive | TG 52:6; [M+NH <sub>4</sub> ] <sup>+</sup> ; TG(16:0/16:1/20:5) | 828.6109 |
| Positive | TG 52:6; [M+NH <sub>4</sub> ] <sup>+</sup> ; TG(16:0/18:3/18:3) | 828.5537 |
| Positive | TG 52:6; [M+NH <sub>4</sub> ] <sup>+</sup> ; TG(16:1/16:1/20:4) | 858.6061 |
| Positive | TG 52:6; [M+NH <sub>4</sub> ] <sup>+</sup> ; TG(16:1/18:2/18:3) | 858.5476 |
| Positive | TG 52:7; [M+NH <sub>4</sub> ] <sup>+</sup> ; TG(16:1/16:1/20:5) | 858.5998 |
| Positive | TG 52:7; [M+NH <sub>4</sub> ] <sup>+</sup> ; TG(16:1/18:3/18:3) | 858.5992 |
| Positive | TG 53:0; [M+Na] <sup>+</sup> ; TG(16:0/17:0/20:0)               | 858.6107 |
| Positive | TG 53:0; [M+Na] <sup>+</sup> ; TG(16:0/18:0/19:0)               | 856.6193 |
| Positive | TG 53:0; [M+Na] <sup>+</sup> ; TG(17:0/18:0/18:0)               | 854.6438 |
| Positive | TG 53:0; [M+NH <sub>4</sub> ] <sup>+</sup> ; TG(16:0/16:0/21:0) | 874.662  |
| Positive | TG 53:0; [M+NH <sub>4</sub> ] <sup>+</sup> ; TG(16:0/17:0/20:0) | 874.6649 |
| Positive | TG 53:0; [M+NH <sub>4</sub> ] <sup>+</sup> ; TG(16:0/18:0/19:0) | 874.6635 |
| Positive | TG 53:0; [M+NH <sub>4</sub> ] <sup>+</sup> ; TG(17:0/18:0/18:0) | 850.6735 |
| Positive | TG 53:1; [M+Na] <sup>+</sup> ; TG(16:0/17:0/20:1)               | 850.6693 |
| Positive | TG 53:1; [M+Na] <sup>+</sup> ; TG(16:0/18:1/19:0)               | 850.673  |
| Positive | TG 53:1; [M+Na] <sup>+</sup> ; TG(17:0/18:0/18:1)               | 850.6732 |
| Positive | TG 53:2; [M+Na] <sup>+</sup> ; TG(16:0/18:2/19:0)               | 848.6074 |
| Positive | TG 53:2; [M+Na] <sup>+</sup> ; TG(17:0/18:0/18:2)               | 848.6569 |
| Positive | TG 53:2; [M+Na] <sup>+</sup> ; TG(17:0/18:1/18:1)               | 896.7058 |
| Positive | TG 53:2; [M+Na] <sup>+</sup> ; TG(17:1/18:0/18:1)               | 896.7093 |

|          |                                                    |          |
|----------|----------------------------------------------------|----------|
| Positive | TG 53:2; [M+NH4] <sup>+</sup> ; TG(16:0/17:0/20:2) | 896.7091 |
| Positive | TG 53:2; [M+NH4] <sup>+</sup> ; TG(16:0/18:2/19:0) | 894.7271 |
| Positive | TG 53:2; [M+NH4] <sup>+</sup> ; TG(16:1/18:1/19:0) | 894.6906 |
| Positive | TG 53:2; [M+NH4] <sup>+</sup> ; TG(17:0/17:2/19:0) | 894.6858 |
| Positive | TG 53:2; [M+NH4] <sup>+</sup> ; TG(17:0/18:0/18:2) | 854.6085 |
| Positive | TG 53:2; [M+NH4] <sup>+</sup> ; TG(17:1/18:0/18:1) | 854.6366 |
| Positive | TG 53:3; [M+NH4] <sup>+</sup> ; TG(16:0/17:0/20:3) | 876.5394 |
| Positive | TG 53:3; [M+NH4] <sup>+</sup> ; TG(16:1/18:2/19:0) | 876.5298 |
| Positive | TG 53:3; [M+NH4] <sup>+</sup> ; TG(17:0/18:1/18:2) | 852.5301 |
| Positive | TG 53:3; [M+NH4] <sup>+</sup> ; TG(17:1/18:0/18:2) | 892.6777 |
| Positive | TG 53:4; [M+NH4] <sup>+</sup> ; TG(16:0/17:0/20:4) | 892.6761 |
| Positive | TG 53:4; [M+NH4] <sup>+</sup> ; TG(16:0/17:1/20:3) | 892.7071 |
| Positive | TG 53:4; [M+NH4] <sup>+</sup> ; TG(17:0/18:1/18:3) | 868.6727 |
| Positive | TG 53:4; [M+NH4] <sup>+</sup> ; TG(17:0/18:2/18:2) | 868.696  |
| Positive | TG 53:4; [M+NH4] <sup>+</sup> ; TG(17:1/18:1/18:2) | 868.6804 |
| Positive | TG 53:5; [M+NH4] <sup>+</sup> ; TG(16:0/17:1/20:4) | 890.6581 |
| Positive | TG 53:5; [M+NH4] <sup>+</sup> ; TG(16:1/17:1/20:3) | 866.7069 |
| Positive | TG 53:5; [M+NH4] <sup>+</sup> ; TG(17:0/18:2/18:3) | 866.6529 |
| Positive | TG 53:5; [M+NH4] <sup>+</sup> ; TG(17:1/18:1/18:3) | 866.7032 |
| Positive | TG 53:5; [M+NH4] <sup>+</sup> ; TG(17:1/18:2/18:2) | 866.7077 |
| Positive | TG 53:6; [M+NH4] <sup>+</sup> ; TG(16:1/17:1/20:4) | 888.64   |
| Positive | TG 53:6; [M+NH4] <sup>+</sup> ; TG(17:1/18:2/18:3) | 888.6449 |
| Positive | TG 53:6; [M+NH4] <sup>+</sup> ; TG(17:2/18:2/18:2) | 864.6468 |
| Positive | TG 53:7; [M+NH4] <sup>+</sup> ; TG(17:1/18:3/18:3) | 864.6724 |
| Positive | TG 53:7; [M+NH4] <sup>+</sup> ; TG(17:2/18:2/18:3) | 864.6526 |
| Positive | TG 54:0; [M+Li] <sup>+</sup> ; TG(16:0/18:0/20:0)  | 864.6306 |
| Positive | TG 54:0; [M+Li] <sup>+</sup> ; TG(17:0/18:0/19:0)  | 864.6542 |
| Positive | TG 54:0; [M+Na] <sup>+</sup> ; TG(16:0/16:0/22:0)  | 862.6154 |
| Positive | TG 54:0; [M+Na] <sup>+</sup> ; TG(16:0/18:0/20:0)  | 860.6042 |
| Positive | TG 54:0; [M+Na] <sup>+</sup> ; TG(17:0/18:0/19:0)  | 858.5888 |
| Positive | TG 54:0; [M+NH4] <sup>+</sup> ; TG(16:0/16:0/22:0) | 858.5954 |
| Positive | TG 54:0; [M+NH4] <sup>+</sup> ; TG(16:0/18:0/20:0) | 858.6699 |
| Positive | TG 54:0; [M+NH4] <sup>+</sup> ; TG(16:0/19:0/19:0) | 856.5813 |
| Positive | TG 54:1; [M+Na] <sup>+</sup> ; TG(16:0/18:1/20:0)  | 856.5811 |
| Positive | TG 54:1; [M+Na] <sup>+</sup> ; TG(18:0/18:0/18:1)  | 856.5857 |
| Positive | TG 54:1; [M+NH4] <sup>+</sup> ; TG(16:0/16:1/22:0) | 856.5727 |
| Positive | TG 54:1; [M+NH4] <sup>+</sup> ; TG(16:0/17:1/21:0) | 856.5808 |
| Positive | TG 54:1; [M+NH4] <sup>+</sup> ; TG(16:0/18:0/20:1) | 856.5902 |
| Positive | TG 54:1; [M+NH4] <sup>+</sup> ; TG(16:0/18:1/20:0) | 908.7539 |
| Positive | TG 54:1; [M+NH4] <sup>+</sup> ; TG(17:0/18:1/19:0) | 908.7553 |
| Positive | TG 54:1; [M+NH4] <sup>+</sup> ; TG(18:0/18:0/18:1) | 908.7508 |

|          |                                                                 |          |
|----------|-----------------------------------------------------------------|----------|
| Positive | TG 54:2; [M+Na] <sup>+</sup> ; TG(16:0/18:1/20:1)               | 880.7215 |
| Positive | TG 54:2; [M+Na] <sup>+</sup> ; TG(18:0/18:0/18:2)               | 879.5857 |
| Positive | TG 54:2; [M+Na] <sup>+</sup> ; TG(18:0/18:1/18:1)               | 902.705  |
| Positive | TG 54:2; [M+NH <sub>4</sub> ] <sup>+</sup> ; TG(16:0/16:1/22:1) | 902.7029 |
| Positive | TG 54:2; [M+NH <sub>4</sub> ] <sup>+</sup> ; TG(16:0/18:0/20:2) | 902.6972 |
| Positive | TG 54:2; [M+NH <sub>4</sub> ] <sup>+</sup> ; TG(16:0/18:1/20:1) | 878.693  |
| Positive | TG 54:2; [M+NH <sub>4</sub> ] <sup>+</sup> ; TG(16:0/18:2/20:0) | 900.6752 |
| Positive | TG 54:2; [M+NH <sub>4</sub> ] <sup>+</sup> ; TG(16:1/18:0/20:1) | 900.6845 |
| Positive | TG 54:2; [M+NH <sub>4</sub> ] <sup>+</sup> ; TG(16:1/18:1/20:0) | 876.6863 |
| Positive | TG 54:2; [M+NH <sub>4</sub> ] <sup>+</sup> ; TG(18:0/18:0/18:2) | 898.6657 |
| Positive | TG 54:2; [M+NH <sub>4</sub> ] <sup>+</sup> ; TG(18:0/18:1/18:1) | 924.7371 |
| Positive | TG 54:3; [M+Na] <sup>+</sup> ; TG(16:0/18:0/20:3)               | 924.7406 |
| Positive | TG 54:3; [M+Na] <sup>+</sup> ; TG(16:0/18:1/20:2)               | 924.8425 |
| Positive | TG 54:3; [M+Na] <sup>+</sup> ; TG(18:0/18:1/18:2)               | 899.6964 |
| Positive | TG 54:3; [M+NH <sub>4</sub> ] <sup>+</sup> ; TG(16:0/18:2/20:1) | 922.7264 |
| Positive | TG 54:3; [M+NH <sub>4</sub> ] <sup>+</sup> ; TG(16:1/18:1/20:1) | 878.7044 |
| Positive | TG 54:3; [M+NH <sub>4</sub> ] <sup>+</sup> ; TG(18:0/18:1/18:2) | 897.7501 |
| Positive | TG 54:4; [M+Na] <sup>+</sup> ; TG(16:0/18:0/20:4)               | 920.7147 |
| Positive | TG 54:4; [M+Na] <sup>+</sup> ; TG(16:0/18:1/20:3)               | 920.7039 |
| Positive | TG 54:4; [M+Na] <sup>+</sup> ; TG(16:0/18:2/20:2)               | 920.7088 |
| Positive | TG 54:4; [M+Na] <sup>+</sup> ; TG(18:0/18:1/18:3)               | 896.7225 |
| Positive | TG 54:4; [M+Na] <sup>+</sup> ; TG(18:0/18:2/18:2)               | 896.7368 |
| Positive | TG 54:4; [M+Na] <sup>+</sup> ; TG(18:1/18:1/18:2)               | 894.6909 |
| Positive | TG 54:4; [M+NH <sub>4</sub> ] <sup>+</sup> ; TG(16:0/18:0/20:4) | 894.6881 |
| Positive | TG 54:4; [M+NH <sub>4</sub> ] <sup>+</sup> ; TG(16:0/18:1/20:3) | 894.7357 |
| Positive | TG 54:4; [M+NH <sub>4</sub> ] <sup>+</sup> ; TG(16:0/18:2/20:2) | 894.7347 |
| Positive | TG 54:4; [M+NH <sub>4</sub> ] <sup>+</sup> ; TG(16:1/18:1/20:2) | 894.7377 |
| Positive | TG 54:4; [M+NH <sub>4</sub> ] <sup>+</sup> ; TG(18:0/18:2/18:2) | 916.6782 |
| Positive | TG 54:4; [M+NH <sub>4</sub> ] <sup>+</sup> ; TG(18:1/18:1/18:2) | 916.6626 |
| Positive | TG 54:5; [M+Na] <sup>+</sup> ; TG(16:0/18:1/20:4)               | 916.6758 |
| Positive | TG 54:5; [M+Na] <sup>+</sup> ; TG(16:0/18:2/20:3)               | 916.7441 |
| Positive | TG 54:5; [M+Na] <sup>+</sup> ; TG(16:1/18:1/20:3)               | 892.6828 |
| Positive | TG 54:5; [M+Na] <sup>+</sup> ; TG(18:1/18:1/18:3)               | 892.5266 |
| Positive | TG 54:5; [M+Na] <sup>+</sup> ; TG(18:1/18:2/18:2)               | 914.6615 |
| Positive | TG 54:5; [M+NH <sub>4</sub> ] <sup>+</sup> ; TG(16:0/18:2/20:3) | 890.7401 |
| Positive | TG 54:5; [M+NH <sub>4</sub> ] <sup>+</sup> ; TG(16:1/18:1/20:3) | 908.7495 |
| Positive | TG 54:5; [M+NH <sub>4</sub> ] <sup>+</sup> ; TG(18:1/18:1/18:3) | 884.6133 |
| Positive | TG 54:5; [M+NH <sub>4</sub> ] <sup>+</sup> ; TG(18:1/18:2/18:2) | 936.7715 |
| Positive | TG 54:6; [M+Li] <sup>+</sup> ; TG(18:0/18:3/18:3)               | 908.7534 |
| Positive | TG 54:6; [M+Na] <sup>+</sup> ; TG(16:0/18:1/20:5)               | 908.7668 |
| Positive | TG 54:6; [M+Na] <sup>+</sup> ; TG(16:0/18:2/20:4)               | 930.693  |

|          |                                                                 |           |
|----------|-----------------------------------------------------------------|-----------|
| Positive | TG 54:6; [M+Na] <sup>+</sup> ; TG(16:1/18:1/20:4)               | 926.6982  |
| Positive | TG 54:6; [M+Na] <sup>+</sup> ; TG(16:1/18:2/20:3)               | 928.71    |
| Positive | TG 54:6; [M+Na] <sup>+</sup> ; TG(18:1/18:2/18:3)               | 950.7522  |
| Positive | TG 54:6; [M+NH <sub>4</sub> ] <sup>+</sup> ; TG(16:0/18:2/20:4) | 948.7402  |
| Positive | TG 54:6; [M+NH <sub>4</sub> ] <sup>+</sup> ; TG(16:1/18:1/20:4) | 948.7501  |
| Positive | TG 54:6; [M+NH <sub>4</sub> ] <sup>+</sup> ; TG(16:1/18:2/20:3) | 946.7178  |
| Positive | TG 54:6; [M+NH <sub>4</sub> ] <sup>+</sup> ; TG(18:1/18:2/18:3) | 944.7032  |
| Positive | TG 54:6; [M+NH <sub>4</sub> ] <sup>+</sup> ; TG(18:2/18:2/18:2) | 920.5636  |
| Positive | TG 54:7; [M+Na] <sup>+</sup> ; TG(16:0/18:2/20:5)               | 918.6968  |
| Positive | TG 54:7; [M+Na] <sup>+</sup> ; TG(16:0/18:3/20:4)               | 918.6841  |
| Positive | TG 54:7; [M+Na] <sup>+</sup> ; TG(16:1/18:2/20:4)               | 918.6951  |
| Positive | TG 54:7; [M+Na] <sup>+</sup> ; TG(16:1/18:3/20:3)               | 978.7887  |
| Positive | TG 54:7; [M+Na] <sup>+</sup> ; TG(18:1/18:3/18:3)               | 1004.8006 |
| Positive | TG 54:7; [M+Na] <sup>+</sup> ; TG(18:2/18:2/18:3)               | 454.2919  |
| Positive | TG 54:7; [M+NH <sub>4</sub> ] <sup>+</sup> ; TG(16:0/16:1/22:6) | 454.2907  |
| Positive | TG 54:7; [M+NH <sub>4</sub> ] <sup>+</sup> ; TG(16:0/18:2/20:5) | 454.2919  |
| Positive | TG 54:7; [M+NH <sub>4</sub> ] <sup>+</sup> ; TG(16:0/18:3/20:4) | 454.2938  |
| Positive | TG 54:7; [M+NH <sub>4</sub> ] <sup>+</sup> ; TG(16:1/18:2/20:4) | 454.2898  |
| Positive | TG 54:7; [M+NH <sub>4</sub> ] <sup>+</sup> ; TG(18:1/18:3/18:3) | 454.2913  |
| Positive | TG 54:8; [M+Na] <sup>+</sup> ; TG(16:1/16:1/22:6)               | 454.2932  |
| Positive | TG 54:8; [M+NH <sub>4</sub> ] <sup>+</sup> ; TG(16:1/16:1/22:6) | 468.3056  |
| Positive | TG 54:8; [M+NH <sub>4</sub> ] <sup>+</sup> ; TG(16:1/18:2/20:5) | 468.3874  |
| Positive | TG 54:8; [M+NH <sub>4</sub> ] <sup>+</sup> ; TG(16:1/18:3/20:4) | 468.3067  |
| Positive | TG 54:8; [M+NH <sub>4</sub> ] <sup>+</sup> ; TG(18:2/18:3/18:3) | 468.3092  |
| Positive | TG 55:0; [M+Li] <sup>+</sup> ; TG(16:0/18:0/21:0)               | 482.3269  |
| Positive | TG 55:0; [M+NH <sub>4</sub> ] <sup>+</sup> ; TG(17:0/18:0/20:0) | 482.3229  |
| Positive | TG 55:1; [M+Li] <sup>+</sup> ; TG(18:0/18:1/19:0)               | 482.3234  |
| Positive | TG 55:1; [M+Na] <sup>+</sup> ; TG(16:0/18:1/21:0)               | 482.4045  |
| Positive | TG 55:1; [M+Na] <sup>+</sup> ; TG(18:0/18:1/19:0)               | 480.3416  |
| Positive | TG 55:1; [M+NH <sub>4</sub> ] <sup>+</sup> ; TG(16:0/18:1/21:0) | 480.3043  |
| Positive | TG 55:1; [M+NH <sub>4</sub> ] <sup>+</sup> ; TG(16:0/19:0/20:1) | 510.3527  |
| Positive | TG 55:1; [M+NH <sub>4</sub> ] <sup>+</sup> ; TG(17:0/18:0/20:1) | 508.3009  |
| Positive | TG 55:1; [M+NH <sub>4</sub> ] <sup>+</sup> ; TG(17:0/18:1/20:0) | 508.3739  |
| Positive | TG 55:1; [M+NH <sub>4</sub> ] <sup>+</sup> ; TG(17:1/18:0/20:0) | 508.3045  |
| Positive | TG 55:2; [M+Na] <sup>+</sup> ; TG(16:0/18:2/21:0)               | 508.302   |
| Positive | TG 55:2; [M+Na] <sup>+</sup> ; TG(16:1/18:1/21:0)               | 524.3621  |
| Positive | TG 55:2; [M+Na] <sup>+</sup> ; TG(17:0/18:1/20:1)               | 538.3867  |
| Positive | TG 55:2; [M+Na] <sup>+</sup> ; TG(18:0/18:2/19:0)               | 538.3819  |
| Positive | TG 55:2; [M+Na] <sup>+</sup> ; TG(18:1/18:1/19:0)               | 538.3841  |
| Positive | TG 55:2; [M+NH <sub>4</sub> ] <sup>+</sup> ; TG(17:0/18:2/20:0) | 538.3841  |
| Positive | TG 55:2; [M+NH <sub>4</sub> ] <sup>+</sup> ; TG(17:1/18:1/20:0) | 538.3864  |

|          |                                                     |          |
|----------|-----------------------------------------------------|----------|
| Positive | TG 55:2; [M+NH4] <sup>+</sup> ; TG(18:0/18:2/19:0)  | 552.4019 |
| Positive | TG 55:2; [M+NH4] <sup>+</sup> ; TG(18:1/18:1/19:0)  | 566.4123 |
| Positive | TG 55:3; [M+Na] <sup>+</sup> ; TG(18:1/18:2/19:0)   | 566.4168 |
| Positive | TG 55:3; [M+NH4] <sup>+</sup> ; TG(16:1/18:2/21:0)  | 566.4148 |
| Positive | TG 55:3; [M+NH4] <sup>+</sup> ; TG(17:0/18:0/20:3)  | 564.3938 |
| Positive | TG 55:3; [M+NH4] <sup>+</sup> ; TG(17:0/18:2/20:1)  | 564.4006 |
| Positive | TG 55:3; [M+NH4] <sup>+</sup> ; TG(17:1/18:1/20:1)  | 558.3174 |
| Positive | TG 55:3; [M+NH4] <sup>+</sup> ; TG(18:1/18:2/19:0)  | 580.3557 |
| Positive | TG 55:4; [M+NH4] <sup>+</sup> ; TG(17:0/18:1/20:3)  | 650.4712 |
| Positive | TG 55:4; [M+NH4] <sup>+</sup> ; TG(17:1/18:0/20:3)  | 664.5145 |
| Positive | TG 55:4; [M+NH4] <sup>+</sup> ; TG(17:1/18:1/20:2)  | 664.5008 |
| Positive | TG 55:4; [M+NH4] <sup>+</sup> ; TG(18:2/18:2/19:0)  | 664.4969 |
| Positive | TG 55:5; [M+NH4] <sup>+</sup> ; TG(16:0/17:1/22:4)  | 664.5079 |
| Positive | TG 55:5; [M+NH4] <sup>+</sup> ; TG(17:0/18:1/20:4)  | 662.4757 |
| Positive | TG 55:5; [M+NH4] <sup>+</sup> ; TG(17:0/18:2/20:3)  | 662.4756 |
| Positive | TG 55:5; [M+NH4] <sup>+</sup> ; TG(17:1/18:0/20:4)  | 678.5077 |
| Positive | TG 55:5; [M+NH4] <sup>+</sup> ; TG(17:1/18:1/20:3)  | 678.4971 |
| Positive | TG 55:6; [M+Li] <sup>+</sup> ; TG(17:0/18:3/20:3)   | 678.5082 |
| Positive | TG 55:6; [M+NH4] <sup>+</sup> ; TG(16:0/17:0/22:6)  | 676.4972 |
| Positive | TG 55:6; [M+NH4] <sup>+</sup> ; TG(17:0/18:2/20:4)  | 706.5391 |
| Positive | TG 55:6; [M+NH4] <sup>+</sup> ; TG(17:1/18:1/20:4)  | 706.5344 |
| Positive | TG 55:6; [M+NH4] <sup>+</sup> ; TG(17:1/18:2/20:3)  | 706.5296 |
| Positive | TG 55:7; [M+NH4] <sup>+</sup> ; TG(16:0/17:1/22:6)  | 704.5225 |
| Positive | TG 55:7; [M+NH4] <sup>+</sup> ; TG(17:1/18:2/20:4)  | 704.5235 |
| Positive | TG 56:0; [M+Na] <sup>+</sup> ; TG(16:0/18:0/22:0)   | 722.2027 |
| Positive | TG 56:0; [M+Na] <sup>+</sup> ; TG(17:0/19:0/20:0)   | 694.5429 |
| Positive | TG 56:0; [M+NH4] <sup>+</sup> ; TG(16:0/18:0/22:0)  | 720.5561 |
| Positive | TG 56:0; [M+NH4] <sup>+</sup> ; TG(16:0/20:0/20:0)  | 720.5534 |
| Positive | TG 56:0; [M+NH4] <sup>+</sup> ; TG(18:0/19:0/19:0)  | 720.5559 |
| Positive | TG 56:1; [M+Li] <sup>+</sup> ; TG(18:0/18:1/20:0)   | 718.5398 |
| Positive | TG 56:1; [M+Na] <sup>+</sup> ; TG(16:0/18:0/22:1)   | 716.2605 |
| Positive | TG 56:1; [M+Na] <sup>+</sup> ; TG(16:0/18:1/22:0)   | 715.6442 |
| Positive | TG 56:1; [M+Na] <sup>+</sup> ; TG(16:0/20:0/20:1)   | 715.6496 |
| Positive | TG 56:1; [M+Na] <sup>+</sup> ; TG(18:0/18:1/20:0)   | 738.5379 |
| Positive | TG 56:1; [M+NH4] <sup>+</sup> ; TG(16:0/18:0/22:1)  | 714.5136 |
| Positive | TG 56:1; [M+NH4] <sup>+</sup> ; TG(16:0/18:1/22:0)  | 714.5543 |
| Positive | TG 56:1; [M+NH4] <sup>+</sup> ; TG(16:1/18:0/22:0)  | 714.5087 |
| Positive | TG 56:1; [M+NH4] <sup>+</sup> ; TG(18:0/18:1/20:0)  | 712.4902 |
| Positive | TG 56:10; [M+NH4] <sup>+</sup> ; TG(16:1/18:3/22:6) | 734.6023 |
| Positive | TG 56:2; [M+Na] <sup>+</sup> ; TG(16:0/18:0/22:2)   | 734.5647 |
| Positive | TG 56:2; [M+Na] <sup>+</sup> ; TG(16:0/18:1/22:1)   | 734.604  |

|          |                                                                 |          |
|----------|-----------------------------------------------------------------|----------|
| Positive | TG 56:2; [M+Na] <sup>+</sup> ; TG(16:0/18:2/22:0)               | 732.6115 |
| Positive | TG 56:2; [M+Na] <sup>+</sup> ; TG(16:1/18:0/22:1)               | 730.5378 |
| Positive | TG 56:2; [M+Na] <sup>+</sup> ; TG(18:0/18:1/20:1)               | 730.5407 |
| Positive | TG 56:2; [M+Na] <sup>+</sup> ; TG(18:0/18:2/20:0)               | 730.538  |
| Positive | TG 56:2; [M+Na] <sup>+</sup> ; TG(18:1/18:1/20:0)               | 730.5631 |
| Positive | TG 56:2; [M+NH <sub>4</sub> ] <sup>+</sup> ; TG(16:0/18:1/22:1) | 730.5386 |
| Positive | TG 56:2; [M+NH <sub>4</sub> ] <sup>+</sup> ; TG(16:0/18:2/22:0) | 750.1495 |
| Positive | TG 56:2; [M+NH <sub>4</sub> ] <sup>+</sup> ; TG(16:0/20:1/20:1) | 750.1714 |
| Positive | TG 56:2; [M+NH <sub>4</sub> ] <sup>+</sup> ; TG(16:1/18:1/22:0) | 726.5036 |
| Positive | TG 56:2; [M+NH <sub>4</sub> ] <sup>+</sup> ; TG(18:0/18:0/20:2) | 726.5054 |
| Positive | TG 56:2; [M+NH <sub>4</sub> ] <sup>+</sup> ; TG(18:0/18:1/20:1) | 746.5109 |
| Positive | TG 56:2; [M+NH <sub>4</sub> ] <sup>+</sup> ; TG(18:0/18:2/20:0) | 746.5741 |
| Positive | TG 56:2; [M+NH <sub>4</sub> ] <sup>+</sup> ; TG(18:1/18:1/20:0) | 768.5522 |
| Positive | TG 56:3; [M+Na] <sup>+</sup> ; TG(16:0/18:0/22:3)               | 744.5596 |
| Positive | TG 56:3; [M+Na] <sup>+</sup> ; TG(18:0/18:0/20:3)               | 744.5559 |
| Positive | TG 56:3; [M+Na] <sup>+</sup> ; TG(18:0/18:1/20:2)               | 766.5417 |
| Positive | TG 56:3; [M+Na] <sup>+</sup> ; TG(18:0/18:3/20:0)               | 766.5348 |
| Positive | TG 56:3; [M+Na] <sup>+</sup> ; TG(18:1/18:1/20:1)               | 742.5359 |
| Positive | TG 56:3; [M+Na] <sup>+</sup> ; TG(18:1/18:2/20:0)               | 742.5396 |
| Positive | TG 56:3; [M+NH <sub>4</sub> ] <sup>+</sup> ; TG(16:0/18:0/22:3) | 764.1259 |
| Positive | TG 56:3; [M+NH <sub>4</sub> ] <sup>+</sup> ; TG(16:0/18:2/22:1) | 764.0992 |
| Positive | TG 56:3; [M+NH <sub>4</sub> ] <sup>+</sup> ; TG(16:0/20:1/20:2) | 740.526  |
| Positive | TG 56:3; [M+NH <sub>4</sub> ] <sup>+</sup> ; TG(16:1/18:2/22:0) | 738.5213 |
| Positive | TG 56:3; [M+NH <sub>4</sub> ] <sup>+</sup> ; TG(18:0/18:0/20:3) | 736.4996 |
| Positive | TG 56:3; [M+NH <sub>4</sub> ] <sup>+</sup> ; TG(18:0/18:1/20:2) | 736.4917 |
| Positive | TG 56:3; [M+NH <sub>4</sub> ] <sup>+</sup> ; TG(18:0/18:2/20:1) | 758.6064 |
| Positive | TG 56:3; [M+NH <sub>4</sub> ] <sup>+</sup> ; TG(18:1/18:1/20:1) | 756.5885 |
| Positive | TG 56:3; [M+NH <sub>4</sub> ] <sup>+</sup> ; TG(18:1/18:2/20:0) | 754.5388 |
| Positive | TG 56:4; [M+Na] <sup>+</sup> ; TG(16:0/18:0/22:4)               | 752.5195 |
| Positive | TG 56:4; [M+Na] <sup>+</sup> ; TG(16:0/18:1/22:3)               | 774.5382 |
| Positive | TG 56:4; [M+Na] <sup>+</sup> ; TG(16:0/20:1/20:3)               | 772.5283 |
| Positive | TG 56:4; [M+Na] <sup>+</sup> ; TG(18:0/18:0/20:4)               | 768.5533 |
| Positive | TG 56:4; [M+Na] <sup>+</sup> ; TG(18:0/18:1/20:3)               | 790.5385 |
| Positive | TG 56:4; [M+Na] <sup>+</sup> ; TG(18:0/18:2/20:2)               | 766.9763 |
| Positive | TG 56:4; [M+Na] <sup>+</sup> ; TG(18:1/18:1/20:2)               | 766.1339 |
| Positive | TG 56:4; [M+Na] <sup>+</sup> ; TG(18:1/18:2/20:1)               | 764.5803 |
| Positive | TG 56:4; [M+NH <sub>4</sub> ] <sup>+</sup> ; TG(16:0/18:1/22:3) | 764.1155 |
| Positive | TG 56:4; [M+NH <sub>4</sub> ] <sup>+</sup> ; TG(16:0/20:1/20:3) | 764.5845 |
| Positive | TG 56:4; [M+NH <sub>4</sub> ] <sup>+</sup> ; TG(17:0/17:0/22:4) | 762.501  |
| Positive | TG 56:4; [M+NH <sub>4</sub> ] <sup>+</sup> ; TG(18:0/18:0/20:4) | 786.6357 |
| Positive | TG 56:4; [M+NH <sub>4</sub> ] <sup>+</sup> ; TG(18:0/18:1/20:3) | 808.7037 |

|          |                                                    |          |
|----------|----------------------------------------------------|----------|
| Positive | TG 56:4; [M+NH4] <sup>+</sup> ; TG(18:0/18:2/20:2) | 808.6176 |
| Positive | TG 56:4; [M+NH4] <sup>+</sup> ; TG(18:1/18:2/20:1) | 784.6857 |
| Positive | TG 56:5; [M+Li] <sup>+</sup> ; TG(16:0/18:0/22:5)  | 778.5429 |
| Positive | TG 56:5; [M+Na] <sup>+</sup> ; TG(16:0/18:0/22:5)  | 778.5005 |
| Positive | TG 56:5; [M+Na] <sup>+</sup> ; TG(16:0/18:1/22:4)  | 804.6453 |
| Positive | TG 56:5; [M+Na] <sup>+</sup> ; TG(18:0/18:1/20:4)  | 824.6149 |
| Positive | TG 56:5; [M+Na] <sup>+</sup> ; TG(18:0/18:2/20:3)  | 824.6166 |
| Positive | TG 56:5; [M+Na] <sup>+</sup> ; TG(18:1/18:1/20:3)  | 800.6142 |
| Positive | TG 56:5; [M+Na] <sup>+</sup> ; TG(18:1/18:2/20:2)  | 822.5955 |
| Positive | TG 56:5; [M+NH4] <sup>+</sup> ; TG(16:0/18:0/22:5) | 792.5567 |
| Positive | TG 56:5; [M+NH4] <sup>+</sup> ; TG(16:0/18:1/22:4) | 790.5403 |
| Positive | TG 56:5; [M+NH4] <sup>+</sup> ; TG(16:0/20:2/20:3) | 786.5686 |
| Positive | TG 56:5; [M+NH4] <sup>+</sup> ; TG(17:0/17:0/22:5) | 816.6377 |
| Positive | TG 56:5; [M+NH4] <sup>+</sup> ; TG(18:0/18:1/20:4) | 814.6329 |
| Positive | TG 56:5; [M+NH4] <sup>+</sup> ; TG(18:1/18:1/20:3) | 834.6387 |
| Positive | TG 56:5; [M+NH4] <sup>+</sup> ; TG(18:1/18:2/20:2) | 834.6325 |
| Positive | TG 56:5; [M+NH4] <sup>+</sup> ; TG(18:1/18:3/20:1) | 832.6105 |
| Positive | TG 56:5; [M+NH4] <sup>+</sup> ; TG(18:2/18:2/20:1) | 832.6179 |
| Positive | TG 56:6; [M+Li] <sup>+</sup> ; TG(16:0/18:1/22:5)  | 852.6469 |
| Positive | TG 56:6; [M+Li] <sup>+</sup> ; TG(16:0/18:3/22:3)  | 828.6503 |
| Positive | TG 56:6; [M+Li] <sup>+</sup> ; TG(16:0/20:3/20:3)  | 828.6474 |
| Positive | TG 56:6; [M+Li] <sup>+</sup> ; TG(18:0/18:3/20:3)  | 828.6462 |
| Positive | TG 56:6; [M+Na] <sup>+</sup> ; TG(16:0/18:1/22:5)  | 850.6469 |
| Positive | TG 56:6; [M+Na] <sup>+</sup> ; TG(16:0/18:2/22:4)  | 850.6317 |
| Positive | TG 56:6; [M+Na] <sup>+</sup> ; TG(16:0/20:3/20:3)  | 850.6296 |
| Positive | TG 56:6; [M+Na] <sup>+</sup> ; TG(16:1/18:1/22:4)  | 826.6461 |
| Positive | TG 56:6; [M+Na] <sup>+</sup> ; TG(18:0/18:1/20:5)  | 848.6024 |
| Positive | TG 56:6; [M+Na] <sup>+</sup> ; TG(18:0/18:2/20:4)  | 856.719  |
| Positive | TG 56:6; [M+Na] <sup>+</sup> ; TG(18:1/18:1/20:4)  | 852.6857 |
| Positive | TG 56:6; [M+Na] <sup>+</sup> ; TG(18:1/18:2/20:3)  | 852.6561 |
| Positive | TG 56:6; [M+NH4] <sup>+</sup> ; TG(16:0/18:0/22:6) | 874.6295 |
| Positive | TG 56:6; [M+NH4] <sup>+</sup> ; TG(16:0/18:1/22:5) | 850.6373 |
| Positive | TG 56:6; [M+NH4] <sup>+</sup> ; TG(16:0/18:2/22:4) | 848.6196 |
| Positive | TG 56:6; [M+NH4] <sup>+</sup> ; TG(16:0/20:3/20:3) | 880.6948 |
| Positive | TG 56:6; [M+NH4] <sup>+</sup> ; TG(16:1/18:1/22:4) | 544.3355 |
| Positive | TG 56:6; [M+NH4] <sup>+</sup> ; TG(18:0/18:2/20:4) | 572.3705 |
| Positive | TG 56:6; [M+NH4] <sup>+</sup> ; TG(18:1/18:1/20:4) | 600.3934 |
| Positive | TG 56:6; [M+NH4] <sup>+</sup> ; TG(18:1/18:2/20:3) | 656.4566 |
| Positive | TG 56:7; [M+Li] <sup>+</sup> ; TG(18:0/18:3/20:4)  | 712.4948 |
| Positive | TG 56:7; [M+Na] <sup>+</sup> ; TG(16:0/18:1/22:6)  | 738.1693 |
| Positive | TG 56:7; [M+Na] <sup>+</sup> ; TG(16:0/18:2/22:5)  | 766.5337 |

|          |                                                                 |          |
|----------|-----------------------------------------------------------------|----------|
| Positive | TG 56:7; [M+Na] <sup>+</sup> ; TG(16:0/20:3/20:4)               | 764.127  |
| Positive | TG 56:7; [M+Na] <sup>+</sup> ; TG(16:1/18:1/22:5)               | 781.7048 |
| Positive | TG 56:7; [M+Na] <sup>+</sup> ; TG(18:0/18:2/20:5)               | 796.5746 |
| Positive | TG 56:7; [M+Na] <sup>+</sup> ; TG(18:1/18:2/20:4)               | 794.5991 |
| Positive | TG 56:7; [M+Na] <sup>+</sup> ; TG(18:1/18:3/20:3)               | 788.5587 |
| Positive | TG 56:7; [M+Na] <sup>+</sup> ; TG(18:2/18:2/20:3)               | 811.0856 |
| Positive | TG 56:7; [M+NH <sub>4</sub> ] <sup>+</sup> ; TG(16:0/18:1/22:6) | 824.6493 |
| Positive | TG 56:7; [M+NH <sub>4</sub> ] <sup>+</sup> ; TG(16:0/18:2/22:5) | 822.6421 |
| Positive | TG 56:7; [M+NH <sub>4</sub> ] <sup>+</sup> ; TG(16:0/20:3/20:4) | 822.675  |
| Positive | TG 56:7; [M+NH <sub>4</sub> ] <sup>+</sup> ; TG(16:1/18:1/22:5) | 822.6841 |
| Positive | TG 56:7; [M+NH <sub>4</sub> ] <sup>+</sup> ; TG(18:1/18:2/20:4) | 816.593  |
| Positive | TG 56:8; [M+Li] <sup>+</sup> ; TG(18:0/18:3/20:5)               | 838.6319 |
| Positive | TG 56:8; [M+Na] <sup>+</sup> ; TG(16:0/20:4/20:4)               | 852.7303 |
| Positive | TG 56:8; [M+Na] <sup>+</sup> ; TG(16:1/18:1/22:6)               | 850.6239 |
| Positive | TG 56:8; [M+Na] <sup>+</sup> ; TG(16:1/18:2/22:5)               | 878.7003 |
| Positive | TG 56:8; [M+Na] <sup>+</sup> ; TG(18:1/18:2/20:5)               | 876.6884 |
| Positive | TG 56:8; [M+Na] <sup>+</sup> ; TG(18:1/18:3/20:4)               | 872.7188 |
| Positive | TG 56:8; [M+Na] <sup>+</sup> ; TG(18:2/18:2/20:4)               | 894.7334 |
| Positive | TG 56:8; [M+NH <sub>4</sub> ] <sup>+</sup> ; TG(16:0/20:4/20:4) | 906.7321 |
| Positive | TG 56:8; [M+NH <sub>4</sub> ] <sup>+</sup> ; TG(16:1/18:1/22:6) | 900.6853 |
| Positive | TG 56:8; [M+NH <sub>4</sub> ] <sup>+</sup> ; TG(16:1/18:2/22:5) | 648.4953 |
| Positive | TG 56:8; [M+NH <sub>4</sub> ] <sup>+</sup> ; TG(18:1/18:2/20:5) | 662.5134 |
| Positive | TG 56:8; [M+NH <sub>4</sub> ] <sup>+</sup> ; TG(18:1/18:3/20:4) | 696.4988 |
| Positive | TG 56:8; [M+NH <sub>4</sub> ] <sup>+</sup> ; TG(18:2/18:2/20:4) | 696.4946 |
| Positive | TG 56:8; [M+NH <sub>4</sub> ] <sup>+</sup> ; TG(18:2/18:3/20:3) | 726.5385 |
| Positive | TG 56:9; [M+NH <sub>4</sub> ] <sup>+</sup> ; TG(16:0/18:3/22:6) | 702.5452 |
| Positive | TG 56:9; [M+NH <sub>4</sub> ] <sup>+</sup> ; TG(16:0/20:4/20:5) | 724.5226 |
| Positive | TG 56:9; [M+NH <sub>4</sub> ] <sup>+</sup> ; TG(16:1/18:2/22:6) | 722.2287 |
| Positive | TG 56:9; [M+NH <sub>4</sub> ] <sup>+</sup> ; TG(16:1/20:4/20:4) | 698.5116 |
| Positive | TG 56:9; [M+NH <sub>4</sub> ] <sup>+</sup> ; TG(18:1/18:3/20:5) | 752.558  |
| Positive | TG 56:9; [M+NH <sub>4</sub> ] <sup>+</sup> ; TG(18:2/18:2/20:5) | 728.5958 |
| Positive | TG 56:9; [M+NH <sub>4</sub> ] <sup>+</sup> ; TG(18:2/18:3/20:4) | 728.2694 |
| Positive | TG 57:0; [M+Na] <sup>+</sup> ; TG(17:0/19:0/21:0)               | 750.1585 |
| Positive | TG 57:1; [M+NH <sub>4</sub> ] <sup>+</sup> ; TG(18:0/18:1/21:0) | 750.1687 |
| Positive | TG 57:2; [M+NH <sub>4</sub> ] <sup>+</sup> ; TG(17:0/18:2/22:0) | 727.5839 |
| Positive | TG 57:2; [M+NH <sub>4</sub> ] <sup>+</sup> ; TG(18:0/18:2/21:0) | 726.5428 |
| Positive | TG 57:2; [M+NH <sub>4</sub> ] <sup>+</sup> ; TG(18:1/18:1/21:0) | 724.5285 |
| Positive | TG 57:2; [M+NH <sub>4</sub> ] <sup>+</sup> ; TG(18:1/19:0/20:1) | 722.5108 |
| Positive | TG 57:2; [M+NH <sub>4</sub> ] <sup>+</sup> ; TG(18:2/19:0/20:0) | 758.6046 |
| Positive | TG 57:3; [M+Li] <sup>+</sup> ; TG(18:1/18:2/21:0)               | 780.5864 |
| Positive | TG 57:3; [M+Na] <sup>+</sup> ; TG(18:1/18:2/21:0)               | 780.5862 |



|          |                                                     |          |
|----------|-----------------------------------------------------|----------|
| Positive | TG 57:3; [M+NH4] <sup>+</sup> ; TG(17:0/18:0/22:3)  | 780.5886 |
| Positive | TG 57:3; [M+NH4] <sup>+</sup> ; TG(18:0/19:0/20:3)  | 778.5742 |
| Positive | TG 57:3; [M+NH4] <sup>+</sup> ; TG(18:1/18:2/21:0)  | 754.5743 |
| Positive | TG 57:3; [M+NH4] <sup>+</sup> ; TG(18:2/19:0/20:1)  | 776.5562 |
| Positive | TG 57:4; [M+Li] <sup>+</sup> ; TG(16:0/20:4/21:0)   | 752.5611 |
| Positive | TG 57:4; [M+NH4] <sup>+</sup> ; TG(17:0/18:0/22:4)  | 752.5597 |
| Positive | TG 57:4; [M+NH4] <sup>+</sup> ; TG(17:0/18:1/22:3)  | 774.5434 |
| Positive | TG 57:4; [M+NH4] <sup>+</sup> ; TG(18:1/19:0/20:3)  | 750.5438 |
| Positive | TG 57:4; [M+NH4] <sup>+</sup> ; TG(18:2/18:2/21:0)  | 750.541  |
| Positive | TG 57:4; [M+NH4] <sup>+</sup> ; TG(18:2/19:0/20:2)  | 748.527  |
| Positive | TG 57:5; [M+NH4] <sup>+</sup> ; TG(17:0/18:0/22:5)  | 808.62   |
| Positive | TG 57:5; [M+NH4] <sup>+</sup> ; TG(17:0/18:1/22:4)  | 808.6154 |
| Positive | TG 57:5; [M+NH4] <sup>+</sup> ; TG(17:0/20:1/20:4)  | 806.6032 |
| Positive | TG 57:5; [M+NH4] <sup>+</sup> ; TG(17:1/18:0/22:4)  | 782.6037 |
| Positive | TG 57:6; [M+NH4] <sup>+</sup> ; TG(17:0/18:1/22:5)  | 804.5819 |
| Positive | TG 57:6; [M+NH4] <sup>+</sup> ; TG(17:0/18:2/22:4)  | 780.5919 |
| Positive | TG 57:6; [M+NH4] <sup>+</sup> ; TG(17:1/18:1/22:4)  | 780.5928 |
| Positive | TG 57:7; [M+NH4] <sup>+</sup> ; TG(17:0/18:2/22:5)  | 802.573  |
| Positive | TG 57:7; [M+NH4] <sup>+</sup> ; TG(17:1/18:1/22:5)  | 802.5711 |
| Positive | TG 57:8; [M+NH4] <sup>+</sup> ; TG(17:0/18:2/22:6)  | 778.5717 |
| Positive | TG 57:8; [M+NH4] <sup>+</sup> ; TG(17:1/20:3/20:4)  | 776.5592 |
| Positive | TG 57:9; [M+NH4] <sup>+</sup> ; TG(17:1/18:2/22:6)  | 836.6519 |
| Positive | TG 58:1; [M+NH4] <sup>+</sup> ; TG(16:0/20:1/22:0)  | 834.6354 |
| Positive | TG 58:10; [M+NH4] <sup>+</sup> ; TG(16:0/20:4/22:6) | 834.632  |
| Positive | TG 58:10; [M+NH4] <sup>+</sup> ; TG(18:2/18:2/22:6) | 808.6238 |
| Positive | TG 58:10; [M+NH4] <sup>+</sup> ; TG(18:2/18:3/22:5) | 808.6603 |
| Positive | TG 58:10; [M+NH4] <sup>+</sup> ; TG(18:2/20:4/20:4) | 804.5914 |
| Positive | TG 58:2; [M+Na] <sup>+</sup> ; TG(18:1/18:1/22:0)   | 842.6879 |
| Positive | TG 58:2; [M+NH4] <sup>+</sup> ; TG(16:0/20:1/22:1)  | 790.1986 |
| Positive | TG 58:2; [M+NH4] <sup>+</sup> ; TG(16:0/20:2/22:0)  | 830.4912 |
| Positive | TG 58:2; [M+NH4] <sup>+</sup> ; TG(16:1/20:1/22:0)  | 862.626  |
| Positive | TG 58:2; [M+NH4] <sup>+</sup> ; TG(18:0/18:2/22:0)  | 543.3947 |
| Positive | TG 58:2; [M+NH4] <sup>+</sup> ; TG(18:1/18:1/22:0)  | 606.4297 |
| Positive | TG 58:2; [M+NH4] <sup>+</sup> ; TG(18:1/20:0/20:1)  | 635.4    |
| Positive | TG 58:3; [M+Na] <sup>+</sup> ; TG(18:1/18:1/22:1)   | 678.4765 |
| Positive | TG 58:3; [M+Na] <sup>+</sup> ; TG(18:1/18:2/22:0)   | 699.5334 |
| Positive | TG 58:3; [M+NH4] <sup>+</sup> ; TG(18:0/18:0/22:3)  | 673.4045 |
| Positive | TG 58:3; [M+NH4] <sup>+</sup> ; TG(18:0/18:1/22:2)  | 713.4994 |
| Positive | TG 58:3; [M+NH4] <sup>+</sup> ; TG(18:0/18:2/22:1)  | 687.4782 |
| Positive | TG 58:3; [M+NH4] <sup>+</sup> ; TG(18:0/20:0/20:3)  | 727.5742 |
| Positive | TG 58:3; [M+NH4] <sup>+</sup> ; TG(18:1/18:2/22:0)  | 741.5437 |

|          |                                                    |          |
|----------|----------------------------------------------------|----------|
| Positive | TG 58:3; [M+NH4] <sup>+</sup> ; TG(18:1/20:1/20:1) | 715.4687 |
| Positive | TG 58:3; [M+NH4] <sup>+</sup> ; TG(18:2/20:0/20:1) | 732.457  |
| Positive | TG 58:4; [M+Na] <sup>+</sup> ; TG(18:0/18:0/22:4)  | 731.4976 |
| Positive | TG 58:4; [M+Na] <sup>+</sup> ; TG(18:0/18:1/22:3)  | 751.571  |
| Positive | TG 58:4; [M+Na] <sup>+</sup> ; TG(18:0/20:1/20:3)  | 748.491  |
| Positive | TG 58:4; [M+Na] <sup>+</sup> ; TG(18:1/18:2/22:1)  | 744.4817 |
| Positive | TG 58:4; [M+NH4] <sup>+</sup> ; TG(18:0/18:0/22:4) | 743.6762 |
| Positive | TG 58:4; [M+NH4] <sup>+</sup> ; TG(18:0/18:1/22:3) | 783.6283 |
| Positive | TG 58:4; [M+NH4] <sup>+</sup> ; TG(18:0/18:2/22:2) | 758.5566 |
| Positive | TG 58:4; [M+NH4] <sup>+</sup> ; TG(18:0/20:0/20:4) | 781.6474 |
| Positive | TG 58:4; [M+NH4] <sup>+</sup> ; TG(18:0/20:1/20:3) | 758.512  |
| Positive | TG 58:4; [M+NH4] <sup>+</sup> ; TG(18:1/18:1/22:2) | 753.4713 |
| Positive | TG 58:4; [M+NH4] <sup>+</sup> ; TG(18:1/18:2/22:1) | 751.6272 |
| Positive | TG 58:4; [M+NH4] <sup>+</sup> ; TG(18:1/20:0/20:3) | 775.6329 |
| Positive | TG 58:4; [M+NH4] <sup>+</sup> ; TG(18:1/20:1/20:2) | 797.6565 |
| Positive | TG 58:4; [M+NH4] <sup>+</sup> ; TG(18:2/18:2/22:0) | 773.6769 |
| Positive | TG 58:5; [M+Li] <sup>+</sup> ; TG(19:0/19:0/20:5)  | 795.6394 |
| Positive | TG 58:5; [M+Na] <sup>+</sup> ; TG(18:0/18:1/22:4)  | 771.7046 |
| Positive | TG 58:5; [M+Na] <sup>+</sup> ; TG(18:0/20:1/20:4)  | 767.4053 |
| Positive | TG 58:5; [M+Na] <sup>+</sup> ; TG(18:0/20:2/20:3)  | 789.6556 |
| Positive | TG 58:5; [M+Na] <sup>+</sup> ; TG(18:1/20:1/20:3)  | 788.5906 |
| Positive | TG 58:5; [M+NH4] <sup>+</sup> ; TG(16:0/20:1/22:4) | 811.6663 |
| Positive | TG 58:5; [M+NH4] <sup>+</sup> ; TG(18:0/18:0/22:5) | 786.5731 |
| Positive | TG 58:5; [M+NH4] <sup>+</sup> ; TG(18:0/18:1/22:4) | 809.6536 |
| Positive | TG 58:5; [M+NH4] <sup>+</sup> ; TG(18:0/20:1/20:4) | 807.6284 |
| Positive | TG 58:5; [M+NH4] <sup>+</sup> ; TG(18:0/20:2/20:3) | 781.6402 |
| Positive | TG 58:5; [M+NH4] <sup>+</sup> ; TG(18:1/18:1/22:3) | 779.1081 |
| Positive | TG 58:5; [M+NH4] <sup>+</sup> ; TG(18:1/18:2/22:2) | 804.0091 |
| Positive | TG 58:5; [M+NH4] <sup>+</sup> ; TG(18:1/20:0/20:4) | 825.6822 |
| Positive | TG 58:5; [M+NH4] <sup>+</sup> ; TG(18:2/20:1/20:2) | 800.5741 |
| Positive | TG 58:6; [M+Li] <sup>+</sup> ; TG(16:0/20:3/22:3)  | 823.6701 |
| Positive | TG 58:6; [M+Na] <sup>+</sup> ; TG(18:0/18:1/22:5)  | 800.7247 |
| Positive | TG 58:6; [M+Na] <sup>+</sup> ; TG(18:0/18:2/22:4)  | 821.6546 |
| Positive | TG 58:6; [M+Na] <sup>+</sup> ; TG(18:0/20:2/20:4)  | 792.6197 |
| Positive | TG 58:6; [M+Na] <sup>+</sup> ; TG(18:1/20:1/20:4)  | 818.5786 |
| Positive | TG 58:6; [M+NH4] <sup>+</sup> ; TG(16:0/20:0/22:6) | 839.6948 |
| Positive | TG 58:6; [M+NH4] <sup>+</sup> ; TG(18:0/18:0/22:6) | 816.5911 |
| Positive | TG 58:6; [M+NH4] <sup>+</sup> ; TG(18:0/18:1/22:5) | 837.6801 |
| Positive | TG 58:6; [M+NH4] <sup>+</sup> ; TG(18:0/18:2/22:4) | 812.5855 |
| Positive | TG 58:6; [M+NH4] <sup>+</sup> ; TG(18:0/20:2/20:4) | 835.6688 |
| Positive | TG 58:6; [M+NH4] <sup>+</sup> ; TG(18:0/20:3/20:3) | 809.1058 |

|          |                                                    |          |
|----------|----------------------------------------------------|----------|
| Positive | TG 58:6; [M+NH4] <sup>+</sup> ; TG(18:1/18:1/22:4) | 807.6429 |
| Positive | TG 58:6; [M+NH4] <sup>+</sup> ; TG(18:1/18:2/22:3) | 831.9468 |
| Positive | TG 58:6; [M+NH4] <sup>+</sup> ; TG(18:1/20:1/20:4) | 853.7111 |
| Positive | TG 58:7; [M+Li] <sup>+</sup> ; TG(18:0/20:3/20:4)  | 830.4241 |
| Positive | TG 58:7; [M+Na] <sup>+</sup> ; TG(16:0/20:3/22:4)  | 851.6959 |
| Positive | TG 58:7; [M+Na] <sup>+</sup> ; TG(18:0/18:2/22:5)  | 827.6738 |
| Positive | TG 58:7; [M+Na] <sup>+</sup> ; TG(18:0/20:3/20:4)  | 849.6849 |
| Positive | TG 58:7; [M+Na] <sup>+</sup> ; TG(18:1/18:1/22:5)  | 823.4714 |
| Positive | TG 58:7; [M+Na] <sup>+</sup> ; TG(18:1/18:2/22:4)  | 820.6669 |
| Positive | TG 58:7; [M+Na] <sup>+</sup> ; TG(18:1/20:2/20:4)  | 846.542  |
| Positive | TG 58:7; [M+Na] <sup>+</sup> ; TG(18:2/20:1/20:4)  | 867.7314 |
| Positive | TG 58:7; [M+NH4] <sup>+</sup> ; TG(18:0/18:1/22:6) | 843.5261 |
| Positive | TG 58:7; [M+NH4] <sup>+</sup> ; TG(18:0/18:2/22:5) | 865.7139 |
| Positive | TG 58:7; [M+NH4] <sup>+</sup> ; TG(18:0/20:3/20:4) | 841.6773 |
| Positive | TG 58:7; [M+NH4] <sup>+</sup> ; TG(18:1/18:1/22:5) | 863.6984 |
| Positive | TG 58:7; [M+NH4] <sup>+</sup> ; TG(18:1/18:2/22:4) | 858.7114 |
| Positive | TG 58:7; [M+NH4] <sup>+</sup> ; TG(18:1/20:2/20:4) | 881.7131 |
| Positive | TG 58:7; [M+NH4] <sup>+</sup> ; TG(18:1/20:3/20:3) | 856.6004 |
| Positive | TG 58:7; [M+NH4] <sup>+</sup> ; TG(18:2/20:1/20:4) | 879.7313 |
| Positive | TG 58:8; [M+Li] <sup>+</sup> ; TG(18:1/18:2/22:5)  | 856.5824 |
| Positive | TG 58:8; [M+Li] <sup>+</sup> ; TG(18:1/20:3/20:4)  | 717.5983 |
| Positive | TG 58:8; [M+Na] <sup>+</sup> ; TG(16:0/20:3/22:5)  | 712.6429 |
| Positive | TG 58:8; [M+Na] <sup>+</sup> ; TG(16:0/20:4/22:4)  | 710.7023 |
| Positive | TG 58:8; [M+Na] <sup>+</sup> ; TG(18:0/18:2/22:6)  | 745.6294 |
| Positive | TG 58:8; [M+Na] <sup>+</sup> ; TG(18:0/20:4/20:4)  | 740.6751 |
| Positive | TG 58:8; [M+Na] <sup>+</sup> ; TG(18:1/18:1/22:6)  | 740.6776 |
| Positive | TG 58:8; [M+Na] <sup>+</sup> ; TG(18:1/18:2/22:5)  | 738.6587 |
| Positive | TG 58:8; [M+Na] <sup>+</sup> ; TG(18:1/20:3/20:4)  | 738.7488 |
| Positive | TG 58:8; [M+Na] <sup>+</sup> ; TG(18:2/20:2/20:4)  | 736.6455 |
| Positive | TG 58:8; [M+NH4] <sup>+</sup> ; TG(16:0/20:4/22:4) | 771.6467 |
| Positive | TG 58:8; [M+NH4] <sup>+</sup> ; TG(18:0/18:2/22:6) | 771.6466 |
| Positive | TG 58:8; [M+NH4] <sup>+</sup> ; TG(18:0/20:4/20:4) | 766.6915 |
| Positive | TG 58:8; [M+NH4] <sup>+</sup> ; TG(18:1/18:1/22:6) | 766.7759 |
| Positive | TG 58:8; [M+NH4] <sup>+</sup> ; TG(18:1/18:2/22:5) | 769.6317 |
| Positive | TG 58:8; [M+NH4] <sup>+</sup> ; TG(18:1/20:3/20:4) | 764.6805 |
| Positive | TG 58:8; [M+NH4] <sup>+</sup> ; TG(18:2/18:2/22:4) | 801.7012 |
| Positive | TG 58:8; [M+NH4] <sup>+</sup> ; TG(18:2/20:2/20:4) | 801.6935 |
| Positive | TG 58:8; [M+NH4] <sup>+</sup> ; TG(18:2/20:3/20:3) | 796.7403 |
| Positive | TG 58:9; [M+Li] <sup>+</sup> ; TG(18:0/20:4/20:5)  | 796.7412 |
| Positive | TG 58:9; [M+Na] <sup>+</sup> ; TG(18:1/20:4/20:4)  | 799.6795 |
| Positive | TG 58:9; [M+NH4] <sup>+</sup> ; TG(16:0/20:3/22:6) | 794.7239 |

|          |                                                     |          |
|----------|-----------------------------------------------------|----------|
| Positive | TG 58:9; [M+NH4] <sup>+</sup> ; TG(16:0/20:4/22:5)  | 797.6623 |
| Positive | TG 58:9; [M+NH4] <sup>+</sup> ; TG(18:1/18:2/22:6)  | 792.7077 |
| Positive | TG 58:9; [M+NH4] <sup>+</sup> ; TG(18:1/18:3/22:5)  | 795.6776 |
| Positive | TG 58:9; [M+NH4] <sup>+</sup> ; TG(18:1/20:4/20:4)  | 790.693  |
| Positive | TG 58:9; [M+NH4] <sup>+</sup> ; TG(18:2/18:2/22:5)  | 829.7266 |
| Positive | TG 58:9; [M+NH4] <sup>+</sup> ; TG(18:2/18:3/22:4)  | 824.77   |
| Positive | TG 58:9; [M+NH4] <sup>+</sup> ; TG(18:2/20:3/20:4)  | 811.677  |
| Positive | TG 59:3; [M+Li] <sup>+</sup> ; TG(18:0/20:3/21:0)   | 827.7087 |
| Positive | TG 59:5; [M+NH4] <sup>+</sup> ; TG(18:1/19:0/22:4)  | 827.7139 |
| Positive | TG 60:1; [M+NH4] <sup>+</sup> ; TG(18:0/20:1/22:0)  | 827.7102 |
| Positive | TG 60:1; [M+NH4] <sup>+</sup> ; TG(18:1/20:0/22:0)  | 822.7554 |
| Positive | TG 60:10; [M+Li] <sup>+</sup> ; TG(18:1/20:4/22:5)  | 822.755  |
| Positive | TG 60:10; [M+NH4] <sup>+</sup> ; TG(16:0/22:4/22:6) | 822.7911 |
| Positive | TG 60:10; [M+NH4] <sup>+</sup> ; TG(18:0/20:4/22:6) | 822.7595 |
| Positive | TG 60:10; [M+NH4] <sup>+</sup> ; TG(18:1/20:3/22:6) | 825.6935 |
| Positive | TG 60:10; [M+NH4] <sup>+</sup> ; TG(18:1/20:4/22:5) | 825.695  |
| Positive | TG 60:10; [M+NH4] <sup>+</sup> ; TG(18:2/20:3/22:5) | 820.7372 |
| Positive | TG 60:10; [M+NH4] <sup>+</sup> ; TG(18:2/20:4/22:4) | 820.7411 |
| Positive | TG 60:11; [M+NH4] <sup>+</sup> ; TG(16:0/22:5/22:6) | 823.6785 |
| Positive | TG 60:11; [M+NH4] <sup>+</sup> ; TG(18:1/20:4/22:6) | 818.7252 |
| Positive | TG 60:11; [M+NH4] <sup>+</sup> ; TG(18:2/20:3/22:6) | 820.2072 |
| Positive | TG 60:11; [M+NH4] <sup>+</sup> ; TG(18:2/20:4/22:5) | 843.7469 |
| Positive | TG 60:11; [M+NH4] <sup>+</sup> ; TG(20:3/20:4/20:4) | 838.7834 |
| Positive | TG 60:2; [M+NH4] <sup>+</sup> ; TG(18:1/20:1/22:0)  | 841.7225 |
| Positive | TG 60:3; [M+NH4] <sup>+</sup> ; TG(18:1/20:1/22:1)  | 841.7277 |
| Positive | TG 60:3; [M+NH4] <sup>+</sup> ; TG(18:2/20:1/22:0)  | 836.7715 |
| Positive | TG 60:4; [M+NH4] <sup>+</sup> ; TG(18:1/20:2/22:1)  | 836.7349 |
| Positive | TG 60:4; [M+NH4] <sup>+</sup> ; TG(18:1/20:3/22:0)  | 839.7131 |
| Positive | TG 60:5; [M+NH4] <sup>+</sup> ; TG(16:0/22:1/22:4)  | 834.713  |
| Positive | TG 60:5; [M+NH4] <sup>+</sup> ; TG(18:0/20:1/22:4)  | 834.7547 |
| Positive | TG 60:5; [M+NH4] <sup>+</sup> ; TG(18:0/20:3/22:2)  | 834.721  |
| Positive | TG 60:5; [M+NH4] <sup>+</sup> ; TG(18:1/20:0/22:4)  | 837.6941 |
| Positive | TG 60:5; [M+NH4] <sup>+</sup> ; TG(18:1/20:1/22:3)  | 832.7419 |
| Positive | TG 60:5; [M+NH4] <sup>+</sup> ; TG(18:1/20:3/22:1)  | 832.8033 |
| Positive | TG 60:5; [M+NH4] <sup>+</sup> ; TG(18:2/20:2/22:1)  | 857.7572 |
| Positive | TG 60:5; [M+NH4] <sup>+</sup> ; TG(18:2/20:3/22:0)  | 852.7993 |
| Positive | TG 60:6; [M+NH4] <sup>+</sup> ; TG(18:0/20:1/22:5)  | 855.7468 |
| Positive | TG 60:6; [M+NH4] <sup>+</sup> ; TG(18:0/20:2/22:4)  | 855.7429 |
| Positive | TG 60:6; [M+NH4] <sup>+</sup> ; TG(18:0/20:3/22:3)  | 850.7872 |
| Positive | TG 60:6; [M+NH4] <sup>+</sup> ; TG(18:0/20:4/22:2)  | 849.9002 |
| Positive | TG 60:6; [M+NH4] <sup>+</sup> ; TG(18:1/20:1/22:4)  | 850.7267 |

|                 |                                                           |                  |
|-----------------|-----------------------------------------------------------|------------------|
| Positive        | TG 60:6; [M+NH4] <sup>+</sup> ; TG(18:1/20:2/22:3)        | 850.6941         |
| Positive        | TG 60:6; [M+NH4] <sup>+</sup> ; TG(18:1/20:4/22:1)        | 853.7259         |
| Positive        | TG 60:6; [M+NH4] <sup>+</sup> ; TG(18:2/20:0/22:4)        | 853.6781         |
| Positive        | TG 60:6; [M+NH4] <sup>+</sup> ; TG(18:2/20:4/22:0)        | 848.771          |
| Positive        | TG 60:6; [M+NH4] <sup>+</sup> ; TG(20:0/20:2/20:4)        | 848.7695         |
| Positive        | TG 60:7; [M+NH4] <sup>+</sup> ; TG(18:0/20:2/22:5)        | 848.7955         |
| Positive        | TG 60:7; [M+NH4] <sup>+</sup> ; TG(18:0/20:3/22:4)        | 848.8046         |
| Positive        | TG 60:7; [M+NH4] <sup>+</sup> ; TG(18:1/20:1/22:5)        | 851.7099         |
| Positive        | TG 60:7; [M+NH4] <sup>+</sup> ; TG(18:1/20:2/22:4)        | 851.7113         |
| Positive        | TG 60:7; [M+NH4] <sup>+</sup> ; TG(18:1/20:3/22:3)        | 851.7097         |
| Positive        | TG 60:7; [M+NH4] <sup>+</sup> ; TG(18:1/20:4/22:2)        | 848.088          |
| Positive        | TG 60:7; [M+NH4] <sup>+</sup> ; TG(18:2/20:1/22:4)        | 846.7543         |
| Positive        | TG 60:7; [M+NH4] <sup>+</sup> ; TG(20:0/20:3/20:4)        | 846.7525         |
| Positive        | TG 60:7; [M+NH4] <sup>+</sup> ; TG(20:1/20:2/20:4)        | 846.7883         |
| Positive        | TG 60:8; [M+Li] <sup>+</sup> ; TG(18:1/20:4/22:3)         | 846.7848         |
| Positive        | TG 60:8; [M+NH4] <sup>+</sup> ; TG(16:0/22:4/22:4)        | 849.6967         |
| Positive        | TG 60:8; [M+NH4] <sup>+</sup> ; TG(18:0/20:2/22:6)        | 849.6949         |
| Positive        | TG 60:8; [M+NH4] <sup>+</sup> ; TG(18:0/20:3/22:5)        | 844.7391         |
| Positive        | TG 60:8; [M+NH4] <sup>+</sup> ; TG(18:0/20:4/22:4)        | 844.7388         |
| Positive        | TG 60:8; [M+NH4] <sup>+</sup> ; TG(18:1/20:1/22:6)        | 847.6766         |
| Positive        | TG 60:8; [M+NH4] <sup>+</sup> ; TG(18:2/20:2/22:4)        | 842.7229         |
| Positive        | TG 60:9; [M+NH4] <sup>+</sup> ; TG(16:0/22:4/22:5)        | 871.7743         |
| Positive        | TG 60:9; [M+NH4] <sup>+</sup> ; TG(18:0/20:3/22:6)        | 871.7704         |
| Positive        | TG 60:9; [M+NH4] <sup>+</sup> ; TG(18:0/20:4/22:5)        | 866.8195         |
| Positive        | TG 60:9; [M+NH4] <sup>+</sup> ; TG(18:1/20:3/22:5)        | 866.8642         |
| Positive        | TG 60:9; [M+NH4] <sup>+</sup> ; TG(18:1/20:4/22:4)        | 869.7602         |
| Positive        | TG 60:9; [M+NH4] <sup>+</sup> ; TG(18:2/20:1/22:6)        | 869.7607         |
| Positive        | TG 60:9; [M+NH4] <sup>+</sup> ; TG(18:2/20:3/22:4)        | 869.7599         |
| Positive        | TG 61:0; [M+Na] <sup>+</sup> ; TG(19:0/21:0/21:0)         | 864.8464         |
| Positive        | TG 62:2; [M+NH4] <sup>+</sup> ; TG(18:1/22:0/22:1)        | 864.8029         |
| Positive        | TG 62:4; [M+NH4] <sup>+</sup> ; TG(18:2/22:1/22:1)        | 864.8026         |
| Positive        | TG 62:5; [M+NH4] <sup>+</sup> ; TG(18:0/22:1/22:4)        | 864.7992         |
| Positive        | TG 62:5; [M+NH4] <sup>+</sup> ; TG(18:1/22:0/22:4)        | 867.7385         |
| Positive        | TG 62:6; [M+NH4] <sup>+</sup> ; TG(18:0/22:2/22:4)        | 867.7411         |
| Positive        | TG 62:6; [M+NH4] <sup>+</sup> ; TG(18:1/22:1/22:4)        | 867.7413         |
| <b>Positive</b> | <b>18:1(d7) Lyso PC (Internal standard)</b>               | <b>588.55789</b> |
| <b>Negative</b> | <b>18:1(d7) Lyso PE (Internal standard)</b>               | <b>485.33785</b> |
| Negative        | CL 62:0; [M-2H] <sup>(2-)</sup> ; CL(16:0/14:0/16:0/16:0) | 662.4803         |
| Negative        | CL 64:3; [M-2H] <sup>(2-)</sup> ; CL(16:1/14:0/16:1/18:1) | 672.4971         |
| Negative        | CL 66:2; [M-2H] <sup>(2-)</sup> ; CL(14:0/16:1/18:0/18:1) | 688.4941         |
| Negative        | CL 66:3; [M-2H] <sup>(2-)</sup> ; CL(14:0/18:2/16:1/18:0) | 686.4829         |

|          |                                               |          |
|----------|-----------------------------------------------|----------|
| Negative | CL 66:4; [M-2H](2-); CL(14:0/18:1/16:1/18:2)  | 686.475  |
| Negative | CL 66:4; [M-2H](2-); CL(14:0/18:1/18:2/16:1)  | 686.4765 |
| Negative | CL 66:4; [M-2H](2-); CL(16:1/16:1/16:1/18:1)  | 686.5114 |
| Negative | CL 68:2; [M-2H](2-); CL(16:0/18:1/16:1/18:0)  | 701.6476 |
| Negative | CL 68:2; [M-2H](2-); CL(16:1/16:0/16:1/20:0)  | 700.5213 |
| Negative | CL 68:3; [M-2H](2-); CL(14:0/18:1/18:0/18:2)  | 699.6027 |
| Negative | CL 68:3; [M-2H](2-); CL(16:0/18:1/16:0/18:2)  | 701.6151 |
| Negative | CL 68:3; [M-2H](2-); CL(16:0/18:1/16:1/18:1)  | 701.6187 |
| Negative | CL 68:3; [M-2H](2-); CL(16:1/16:1/18:1/18:0)  | 700.6346 |
| Negative | CL 68:3; [M-2H](2-); CL(18:1/16:0/18:2/16:0)  | 700.4896 |
| Negative | CL 68:4; [M-2H](2-); CL(16:0/16:1/18:1/18:2)  | 700.6097 |
| Negative | CL 68:4; [M-2H](2-); CL(16:1/16:0/18:2/18:1)  | 700.4858 |
| Negative | CL 68:4; [M-2H](2-); CL(16:1/18:1/18:2/16:0)  | 700.4923 |
| Negative | CL 70:0; [M-2H](2-); CL(18:0/16:0/18:0/18:0)  | 718.5397 |
| Negative | CL 70:3; [M-2H](2-); CL(16:0/16:0/18:1/20:2)  | 714.507  |
| Negative | CL 70:3; [M-2H](2-); CL(16:0/18:0/18:1/18:2)  | 714.6532 |
| Negative | CL 70:3; [M-2H](2-); CL(16:0/18:1/18:0/18:2)  | 713.4899 |
| Negative | CL 70:3; [M-2H](2-); CL(18:1/16:0/18:1/18:1)  | 714.504  |
| Negative | CL 70:4; [M-2H](2-); CL(16:0/18:1/18:1/18:2)  | 713.4893 |
| Negative | CL 70:4; [M-2H](2-); CL(16:1/18:1/18:1/18:1)  | 713.5001 |
| Negative | CL 70:4; [M-2H](2-); CL(16:1/18:1/18:2/18:0)  | 714.6548 |
| Negative | CL 70:4; [M-2H](2-); CL(18:0/16:1/18:1/18:2)  | 713.6257 |
| Negative | CL 70:4; [M-2H](2-); CL(18:1/16:0/18:2/18:1)  | 713.4925 |
| Negative | CL 70:4; [M-2H](2-); CL(18:1/16:1/18:1/18:1)  | 713.5011 |
| Negative | CL 70:4; [M-2H](2-); CL(18:1/16:1/18:2/18:0)  | 713.6249 |
| Negative | CL 70:5; [M-2H](2-); CL(16:1/18:2/18:1/18:1)  | 712.4915 |
| Negative | CL 70:5; [M-2H](2-); CL(18:1/16:1/18:1/18:2)  | 712.489  |
| Negative | CL 70:5; [M-2H](2-); CL(18:1/18:1/18:2/16:1)  | 712.4916 |
| Negative | CL 70:5; [M-2H](2-); CL(18:1/18:2/18:2/16:0)  | 712.4867 |
| Negative | CL 70:5; [M-2H](2-); CL(18:2/16:0/18:2/18:1)  | 713.4968 |
| Negative | CL 70:6; [M-2H](2-); CL(16:0/18:1/18:2/18:3)  | 712.4935 |
| Negative | CL 70:6; [M-2H](2-); CL(16:0/18:2/18:3/18:1)  | 712.6361 |
| Negative | CL 70:6; [M-2H](2-); CL(16:0/18:3/18:1/18:2)  | 712.4966 |
| Negative | CL 70:6; [M-2H](2-); CL(16:1/18:2/18:2/18:1)  | 712.6409 |
| Negative | CL 72:0; [M-2H](2-); CL(16:0/20:0/18:0/18:0)  | 730.6129 |
| Negative | CL 72:0; [M-2H](2-); CL(18:0/16:0/18:0/20:0)  | 732.5856 |
| Negative | CL 72:1; [M-2H](2-); CL(18:0/18:0/18:0/18:1)  | 729.5586 |
| Negative | CL 72:1; [M-2H](2-); CL(18:0/18:1/20:0/16:0)  | 731.5702 |
| Negative | CL 72:10; [M-2H](2-); CL(16:1/20:4/18:2/18:3) | 722.5125 |
| Negative | CL 72:10; [M-2H](2-); CL(18:2/18:3/20:4/16:1) | 720.4983 |
| Negative | CL 72:2; [M-2H](2-); CL(16:0/18:0/18:1/20:1)  | 730.571  |

|          |                                                            |          |
|----------|------------------------------------------------------------|----------|
| Negative | CL 72:3; [M-2H](2-); CL(16:0/18:1/18:2/20:0)               | 728.5271 |
| Negative | CL 72:3; [M-2H](2-); CL(16:0/18:2/18:1/20:0)               | 728.5204 |
| Negative | CL 72:3; [M-2H](2-); CL(18:0/18:1/18:0/18:2)               | 728.5739 |
| Negative | CL 72:3; [M-2H](2-); CL(18:1/16:0/18:1/20:1)               | 728.584  |
| Negative | CL 72:3; [M-2H](2-); CL(18:1/18:0/18:2/18:0)               | 728.5786 |
| Negative | CL 72:5; [M-2H](2-); CL(16:0/18:2/18:1/20:2)               | 726.5894 |
| Negative | CL 72:5; [M-2H](2-); CL(18:1/18:0/18:2/18:2)               | 726.6546 |
| Negative | CL 72:6; [M-2H](2-); CL(16:0/18:1/18:2/20:3)               | 726.5453 |
| Negative | CL 72:6; [M-2H](2-); CL(16:0/20:3/18:1/18:2)               | 726.5614 |
| Negative | CL 72:6; [M-2H](2-); CL(16:1/18:1/18:2/20:2)               | 726.5564 |
| Negative | CL 72:6; [M-2H](2-); CL(18:1/18:1/18:2/18:2)               | 725.4927 |
| Negative | CL 72:6; [M-2H](2-); CL(18:1/18:2/18:1/18:2)               | 725.4943 |
| Negative | lysoPE 15:1; [M-H]-; PE(15:1(9Z)/0:0)                      | 436.2828 |
| Negative | lysoPE 16:0; [M-H]-; PE(16:0/0:0)                          | 452.2828 |
| Negative | lysoPE 16:1; [M-H]-; PE(16:1(7Z)/0:0)                      | 450.2951 |
| Negative | lysoPE 17:1; [M-H]-; PE(17:1(9Z)/0:0)                      | 464.3158 |
| Negative | PC 17:0; [M+HCOO]-; GPCho(2:0/15:0)                        | 568.532  |
| Negative | PC 18:0; [M+HCOO]-; GPCho(2:0/16:0)                        | 581.3689 |
| Negative | PC 18:1; [M+HCOO]-; GPCho(2:0/16:1(7Z))                    | 580.5316 |
| Negative | PC 19:0; [M+HCOO]-; GPCho(2:0/17:0)                        | 596.5256 |
| Negative | PC 19:0; [M-CH3]-; GPCho(3:0/16:0)                         | 536.5064 |
| Negative | PC 20:0; [M+HCOO]-; GPCho(2:0/18:0)                        | 610.5765 |
| Negative | PC 21:0; [M+HCOO]-; GPCho(2:0/19:0)                        | 623.4922 |
| Negative | PC 22:0; [M+HCOO]-; GPCho(2:0/20:0)                        | 638.6075 |
| Negative | PC 22:1; [M+HCOO]-; GPCho(2:0/20:1(11E))                   | 635.5227 |
| Negative | PC 22:5; [M+HCOO]-; GPCho(2:0/20:5(5Z,8Z,11Z,14Z,17Z))     | 627.4763 |
| Negative | PC 23:0; [M+HCOO]-; GPCho(2:0/21:0)                        | 651.6059 |
| Negative | PC 23:0; [M+HCOO]-; GPCho(7:0/16:0)                        | 651.4771 |
| Negative | PC 23:0; [M+HCOO]-; GPCho(8:0/15:0)                        | 651.471  |
| Negative | PC 24:0; [M+HCOO]-; GPCho(11:0/13:0)                       | 665.5357 |
| Negative | PC 24:0; [M+HCOO]-; GPCho(6:0/18:0)                        | 665.5356 |
| Negative | PC 24:0; [M+HCOO]-; GPCho(9:0/15:0)                        | 666.6029 |
| Negative | PC 24:4; [M+HCOO]-; GPCho(4:0/20:4(5E,8E,11E,14E))         | 658.2384 |
| Negative | PC 24:6; [M+HCOO]-; GPCho(2:0/22:6(4Z,7Z,10Z,13Z,16Z,19Z)) | 654.5955 |
| Negative | PC 25:0; [M+HCOO]-; GPCho(2:0/23:0)                        | 680.6434 |
| Negative | PC 26:1; [M+HCOO]-; GPCho(2:0/24:1(15Z))                   | 692.5663 |
| Negative | PC 26:4; [M+HCOO]-; GPCho(2:0/24:4(5Z,8Z,11Z,14Z))         | 686.2701 |
| Negative | PC 26:6; [M+HCOO]-; GPCho(4:0/22:6(4Z,7Z,10Z,13Z,16Z,19Z)) | 681.5148 |
| Negative | PC 28:0; [M+HCOO]-; GPCho(12:0/16:0)                       | 721.5059 |
| Negative | PC 28:0; [M+HCOO]-; GPCho(14:0/14:0)                       | 722.5075 |
| Negative | PC 28:0; [M+HCOO]-; GPCho(2:0/26:0)                        | 722.6321 |

|          |                                                              |          |
|----------|--------------------------------------------------------------|----------|
| Negative | PC 28:0; [M+HCOO] <sup>-</sup> ; GPCho(9:0/19:0)             | 722.6267 |
| Negative | PC 28:0; [M-Ac-H] <sup>-</sup> ; GPCho(12:0/16:0)            | 736.5092 |
| Negative | PC 28:0; [M-Ac-H] <sup>-</sup> ; GPCho(14:0/14:0)            | 736.5094 |
| Negative | PC 29:1; [M-Ac-H] <sup>-</sup> ; GPCho(14:0/15:1(9Z))        | 748.5481 |
| Negative | PC 30:0; [M+HCOO] <sup>-</sup> ; GPCho(14:0/16:0)            | 750.5539 |
| Negative | PC 30:0; [M-Ac-H] <sup>-</sup> ; GPCho(14:0/16:0)            | 764.5456 |
| Negative | PC 30:0; [M-CH3] <sup>-</sup> ; GPCho(14:0/16:0)             | 690.514  |
| Negative | PC 30:1; [M-Ac-H] <sup>-</sup> ; GPCho(14:0/16:1(7Z))        | 762.5538 |
| Negative | PC 30:1; [M-CH3] <sup>-</sup> ; GPCho(14:0/16:1(7Z))         | 688.4999 |
| Negative | PC 30:2; [M-CH3] <sup>-</sup> ; GPCho(14:1(9Z)/16:1(7Z))     | 686.4726 |
| Negative | PC 30:2; [M-CH3] <sup>-</sup> ; GPCho(15:1(9Z)/15:1(9Z))     | 686.272  |
| Negative | PC 31:0; [M-Ac-H] <sup>-</sup> ; GPCho(15:0/16:0)            | 778.5763 |
| Negative | PC 31:1; [M+HCOO] <sup>-</sup> ; GPCho(13:0/18:1(11E))       | 762.5987 |
| Negative | PC 31:1; [M+HCOO] <sup>-</sup> ; GPCho(15:1(9Z)/16:0)        | 762.5067 |
| Negative | PC 31:1; [M-Ac-H] <sup>-</sup> ; GPCho(13:0/18:1(11E))       | 776.5687 |
| Negative | PC 31:3; [M-Ac-H] <sup>-</sup> ; GPCho(11:0/20:3(5Z,8Z,11Z)) | 772.5626 |
| Negative | PC 32:0; [M+HCOO] <sup>-</sup> ; GPCho(14:0/18:0)            | 778.5737 |
| Negative | PC 32:0; [M+HCOO] <sup>-</sup> ; GPCho(15:0/17:0)            | 778.577  |
| Negative | PC 32:0; [M+HCOO] <sup>-</sup> ; GPCho(16:0/16:0)            | 779.5527 |
| Negative | PC 32:0; [M+HCOO] <sup>-</sup> ; GPCho(6:0/26:0)             | 778.574  |
| Negative | PC 32:0; [M-Ac-H] <sup>-</sup> ; GPCho(14:0/18:0)            | 792.6097 |
| Negative | PC 32:0; [M-Ac-H] <sup>-</sup> ; GPCho(16:0/16:0)            | 792.567  |
| Negative | PC 32:1; [M-Ac-H] <sup>-</sup> ; GPCho(14:0/18:1(11E))       | 790.5763 |
| Negative | PC 32:1; [M-Ac-H] <sup>-</sup> ; GPCho(16:0/16:1(7Z))        | 790.6329 |
| Negative | PC 32:1; [M-CH3] <sup>-</sup> ; GPCho(16:0/16:1(9Z))         | 716.5264 |
| Negative | PC 32:1; [M-CH3] <sup>-</sup> ; GPCho(16:1(7Z)/16:0)         | 716.5254 |
| Negative | PC 32:2; [M-Ac-H] <sup>-</sup> ; GPCho(14:0/18:2(2E,4E))     | 788.5459 |
| Negative | PC 32:2; [M-Ac-H] <sup>-</sup> ; GPCho(14:1(9Z)/18:1(11E))   | 788.523  |
| Negative | PC 32:2; [M-Ac-H] <sup>-</sup> ; GPCho(16:1(7Z)/16:1(7Z))    | 788.5407 |
| Negative | PC 32:3; [M+HCOO] <sup>-</sup> ; GPCho(14:1(9Z)/18:2(2E,4E)) | 771.634  |
| Negative | PC 32:3; [M-Ac-H] <sup>-</sup> ; GPCho(14:1(9Z)/18:2(2E,4E)) | 786.5294 |
| Negative | PC 33:0; [M+HCOO] <sup>-</sup> ; GPCho(16:0/17:0)            | 792.6132 |
| Negative | PC 33:0; [M-Ac-H] <sup>-</sup> ; GPCho(15:0/18:0)            | 806.5807 |
| Negative | PC 33:0; [M-Ac-H] <sup>-</sup> ; GPCho(16:0/17:0)            | 806.6078 |
| Negative | PC 33:1; [M+HCOO] <sup>-</sup> ; GPCho(15:0/18:1(11E))       | 790.5951 |
| Negative | PC 33:1; [M+HCOO] <sup>-</sup> ; GPCho(15:1(9Z)/18:0)        | 790.5966 |
| Negative | PC 33:1; [M+HCOO] <sup>-</sup> ; GPCho(16:0/17:1(9Z))        | 790.5916 |
| Negative | PC 33:1; [M+HCOO] <sup>-</sup> ; GPCho(16:1(7Z)/17:0)        | 790.597  |
| Negative | PC 33:1; [M-Ac-H] <sup>-</sup> ; GPCho(15:0/18:1(11E))       | 804.5949 |
| Negative | PC 33:1; [M-Ac-H] <sup>-</sup> ; GPCho(16:0/17:1(9Z))        | 804.5742 |
| Negative | PC 33:1; [M-CH3] <sup>-</sup> ; GPCho(15:0/18:1(11E))        | 730.5379 |



|          |                                                             |          |
|----------|-------------------------------------------------------------|----------|
| Negative | PC 33:2; [M-CH3]-; GPCho(15:0/18:2(2E,4E))                  | 728.5206 |
| Negative | PC 33:3; [M-Ac-H]-; GPCho(15:0/18:3(6Z,9Z,12Z))             | 800.5463 |
| Negative | PC 34:0; [M-CH3]-; GPCho(16:0/18:0)                         | 746.5712 |
| Negative | PC 34:1; [M+HCOO]-; GPCho(16:0/18:1(11E))                   | 805.5957 |
| Negative | PC 34:1; [M-Ac-H]-; GPCho(16:0/18:1(11E))                   | 818.5945 |
| Negative | PC 34:1; [M-CH3]-; GPCho(16:0/18:1(11E))                    | 744.5546 |
| Negative | PC 34:2; [M+HCOO]-; GPCho(16:0/18:2(2E,4E))                 | 803.5904 |
| Negative | PC 34:2; [M-Ac-H]-; GPCho(16:0/18:2(2E,4E))                 | 816.6347 |
| Negative | PC 34:2; [M-Ac-H]-; GPCho(16:1(7Z)/18:1(11E))               | 816.5816 |
| Negative | PC 34:2; [M-CH3]-; GPCho(16:1(7Z)/18:1(11E))                | 742.5394 |
| Negative | PC 34:4; [M-Ac-H]-; GPCho(14:0/20:4(5E,8E,11E,14E))         | 812.5499 |
| Negative | PC 34:4; [M-Ac-H]-; GPCho(16:1(7Z)/18:3(6Z,9Z,12Z))         | 812.5446 |
| Negative | PC 34:5; [M-Ac-H]-; GPCho(14:0/20:5(5Z,8Z,11Z,14Z,17Z))     | 810.5368 |
| Negative | PC 34:5; [M-Ac-H]-; GPCho(16:1(7Z)/18:4(6Z,9Z,12Z,15Z))     | 810.5279 |
| Negative | PC 35:1; [M-Ac-H]-; GPCho(17:0/18:1(11E))                   | 832.6136 |
| Negative | PC 35:1; [M-Ac-H]-; GPCho(17:1(9Z)/18:0)                    | 832.6279 |
| Negative | PC 35:2; [M-Ac-H]-; GPCho(17:0/18:2(2E,4E))                 | 830.6113 |
| Negative | PC 35:4; [M-Ac-H]-; GPCho(15:0/20:4(5E,8E,11E,14E))         | 826.566  |
| Negative | PC 35:4; [M-Ac-H]-; GPCho(17:1(9Z)/18:3(6Z,9Z,12Z))         | 826.5578 |
| Negative | PC 35:5; [M+HCOO]-; GPCho(15:1(9Z)/20:4(5E,8E,11E,14E))     | 810.5958 |
| Negative | PC 36:0; [M-CH3]-; GPCho(16:0/20:0)                         | 774.5947 |
| Negative | PC 36:0; [M-CH3]-; GPCho(20:0/16:0)                         | 774.5996 |
| Negative | PC 36:1; [M-Ac-H]-; GPCho(12:0/24:1(15Z))                   | 846.6255 |
| Negative | PC 36:1; [M-Ac-H]-; GPCho(16:0/20:1(11E))                   | 846.6182 |
| Negative | PC 36:1; [M-Ac-H]-; GPCho(18:0/18:1(11E))                   | 846.6233 |
| Negative | PC 36:1; [M-CH3]-; GPCho(18:1(11E)/18:0)                    | 772.5491 |
| Negative | PC 36:2; [M-CH3]-; GPCho(18:0/18:2(2E,4E))                  | 770.5638 |
| Negative | PC 36:2; [M-CH3]-; GPCho(18:1(11E)/18:1(11E))               | 770.5685 |
| Negative | PC 36:2; [M-CH3]-; GPCho(18:2(2E,4E)/18:0)                  | 770.5767 |
| Negative | PC 36:3; [M+HCOO]-; GPCho(16:0/20:3(5Z,8Z,11Z))             | 828.576  |
| Negative | PC 36:3; [M-Ac-H]-; GPCho(16:0/20:3(5Z,8Z,11Z))             | 842.5905 |
| Negative | PC 36:3; [M-Ac-H]-; GPCho(18:1(11E)/18:2(2E,4E))            | 842.5938 |
| Negative | PC 36:3; [M-CH3]-; GPCho(16:0/20:3(5Z,8Z,11Z))              | 768.5699 |
| Negative | PC 36:3; [M-CH3]-; GPCho(18:2(2E,4E)/18:1(11E))             | 768.556  |
| Negative | PC 36:5; [M+HCOO]-; GPCho(16:1(7Z)/20:4(5E,8E,11E,14E))     | 824.5482 |
| Negative | PC 36:5; [M-Ac-H]-; GPCho(16:0/20:5(5Z,8Z,11Z,14Z,17Z))     | 838.5697 |
| Negative | PC 36:5; [M-Ac-H]-; GPCho(16:1(7Z)/20:4(5E,8E,11E,14E))     | 838.5595 |
| Negative | PC 36:5; [M-Ac-H]-; GPCho(18:2(2E,4E)/18:3(6Z,9Z,12Z))      | 838.56   |
| Negative | PC 36:5; [M-CH3]-; GPCho(16:0/20:5(5Z,8Z,11Z,14Z,17Z))      | 764.526  |
| Negative | PC 36:5; [M-CH3]-; GPCho(16:1(7Z)/20:4(5E,8E,11E,14E))      | 764.5293 |
| Negative | PC 36:6; [M-Ac-H]-; GPCho(14:0/22:6(4Z,7Z,10Z,13Z,16Z,19Z)) | 836.5542 |

|          |                                                                |          |
|----------|----------------------------------------------------------------|----------|
| Negative | PC 36:6; [M-Ac-H]-; GPCho(16:1(7Z)/20:5(5Z,8Z,11Z,14Z,17Z))    | 836.5386 |
| Negative | PC 36:6; [M-Ac-H]-; GPCho(18:3(6Z,9Z,12Z)/18:3(6Z,9Z,12Z))     | 836.542  |
| Negative | PC 37:1; [M-Ac-H]-; GPCho(17:0/20:1(11E))                      | 860.6377 |
| Negative | PC 37:1; [M-Ac-H]-; GPCho(18:1(11E)/19:0)                      | 860.6414 |
| Negative | PC 37:2; [M-Ac-H]-; GPCho(17:0/20:2(11Z,14Z))                  | 858.6164 |
| Negative | PC 37:2; [M-Ac-H]-; GPCho(17:2(9Z,12Z)/20:0)                   | 858.623  |
| Negative | PC 37:2; [M-Ac-H]-; GPCho(18:2(2E,4E)/19:0)                    | 858.6253 |
| Negative | PC 37:4; [M-Ac-H]-; GPCho(17:0/20:4(5E,8E,11E,14E))            | 854.5982 |
| Negative | PC 37:4; [M-Ac-H]-; GPCho(17:1(9Z)/20:3(5Z,8Z,11Z))            | 854.5898 |
| Negative | PC 37:4; [M-CH3]-; GPCho(17:0/20:4(5E,8E,11E,14E))             | 780.5525 |
| Negative | PC 37:5; [M+HCOO]-; GPCho(17:1(9Z)/20:4(5E,8E,11E,14E))        | 838.5983 |
| Negative | PC 37:6; [M-Ac-H]-; GPCho(15:0/22:6(4Z,7Z,10Z,13Z,16Z,19Z))    | 850.5363 |
| Negative | PC 37:6; [M-Ac-H]-; GPCho(17:2(9Z,12Z)/20:4(5E,8E,11E,14E))    | 850.5598 |
| Negative | PC 38:1; [M-Ac-H]-; GPCho(16:0/22:1(13Z))                      | 874.6557 |
| Negative | PC 38:1; [M-Ac-H]-; GPCho(18:0/20:1(11E))                      | 874.6574 |
| Negative | PC 38:1; [M-CH3]-; GPCho(18:0/20:1(11E))                       | 800.6124 |
| Negative | PC 38:1; [M-CH3]-; GPCho(22:1(13Z)/16:0)                       | 800.6139 |
| Negative | PC 38:2; [M-Ac-H]-; GPCho(16:0/22:2(13Z,16Z))                  | 871.7248 |
| Negative | PC 38:2; [M-Ac-H]-; GPCho(18:0/20:2(11Z,14Z))                  | 872.6437 |
| Negative | PC 38:2; [M-Ac-H]-; GPCho(18:1(11E)/20:1(11E))                 | 872.6327 |
| Negative | PC 38:2; [M-Ac-H]-; GPCho(18:2(2E,4E)/20:0)                    | 872.6329 |
| Negative | PC 38:2; [M-CH3]-; GPCho(18:0/20:2(11Z,14Z))                   | 799.5478 |
| Negative | PC 38:2; [M-CH3]-; GPCho(18:1(11E)/20:1(11E))                  | 798.5997 |
| Negative | PC 38:3; [M-CH3]-; GPCho(18:0/20:3(5Z,8Z,11Z))                 | 796.548  |
| Negative | PC 38:4; [M+HCOO]-; GPCho(18:0/20:4(5E,8E,11E,14E))            | 854.5942 |
| Negative | PC 38:4; [M-Ac-H]-; GPCho(18:0/20:4(5E,8E,11E,14E))            | 868.609  |
| Negative | PC 38:4; [M-CH3]-; GPCho(16:0/22:4(7Z,10Z,13Z,16Z))            | 794.5326 |
| Negative | PC 38:4; [M-CH3]-; GPCho(18:0/20:4(5E,8E,11E,14E))             | 794.5985 |
| Negative | PC 38:4; [M-CH3]-; GPCho(18:1(11E)/20:3(5Z,8Z,11Z))            | 794.5715 |
| Negative | PC 38:4; [M-CH3]-; GPCho(20:4(5E,8E,11E,14E)/18:0)             | 794.5313 |
| Negative | PC 38:6; [M-CH3]-; GPCho(16:0/22:6(4Z,7Z,10Z,13Z,16Z,19Z))     | 790.5399 |
| Negative | PC 38:6; [M-CH3]-; GPCho(18:2(2E,4E)/20:4(5E,8E,11E,14E))      | 790.5382 |
| Negative | PC 38:7; [M-Ac-H]-; GPCho(18:3(6Z,9Z,12Z)/20:4(5E,8E,11E,14E)) | 862.5607 |
| Negative | PC 39:6; [M-Ac-H]-; GPCho(17:0/22:6(4Z,7Z,10Z,13Z,16Z,19Z))    | 878.5911 |
| Negative | PC 40:1; [M-CH3]-; GPCho(16:0/24:1(15Z))                       | 828.6462 |
| Negative | PC 40:4; [M-Ac-H]-; GPCho(20:0/20:4(5E,8E,11E,14E))            | 896.6406 |
| Negative | PC 40:5; [M+HCOO]-; GPCho(18:3(6Z,9Z,12Z)/22:2(13Z,16Z))       | 880.6627 |
| Negative | PC 40:5; [M+HCOO]-; GPCho(20:1(11E)/20:4(5E,8E,11E,14E))       | 880.6686 |
| Negative | PC 40:5; [M+HCOO]-; GPCho(20:2(11Z,14Z)/20:3(5Z,8Z,11Z))       | 880.6831 |
| Negative | PC 40:6; [M+HCOO]-; GPCho(18:0/22:6(4Z,7Z,10Z,13Z,16Z,19Z))    | 879.5682 |
| Negative | PC 40:6; [M-Ac-H]-; GPCho(18:2(2E,4E)/22:4(7Z,10Z,13Z,16Z))    | 892.6103 |

|          |                                                                                        |          |
|----------|----------------------------------------------------------------------------------------|----------|
| Negative | PC 40:6; [M-CH3]-; GPCho(18:1(11E)/22:5(4Z,7Z,10Z,13Z,16Z))                            | 819.5209 |
| Negative | PC 40:7; [M-Ac-H]-; GPCho(18:1(11E)/22:6(4Z,7Z,10Z,13Z,16Z,19Z))                       | 890.5885 |
| Negative | PC 40:7; [M-Ac-H]-; GPCho(18:2(2E,4E)/22:5(4Z,7Z,10Z,13Z,16Z))                         | 890.5956 |
| Negative | PC 40:7; [M-CH3]-; GPCho(18:1(11E)/22:6(4Z,7Z,10Z,13Z,16Z,19Z))                        | 816.5918 |
| Negative | PC 40:8; [M-Ac-H]-; GPCho(18:2(2E,4E)/22:6(4Z,7Z,10Z,13Z,16Z,19Z))                     | 888.5774 |
| Negative | PC 41:0; [M-Ac-H]-; GPCho(16:0/25:0)                                                   | 918.7222 |
| Negative | PC 41:1; [M-Ac-H]-; GPCho(15:1(9Z)/26:0)                                               | 916.7437 |
| Negative | PC 41:1; [M-Ac-H]-; GPCho(18:1(11E)/23:0)                                              | 916.7442 |
| Negative | PC 41:6; [M-Ac-H]-; GPCho(19:0/22:6(4Z,7Z,10Z,13Z,16Z,19Z))                            | 906.6077 |
| Negative | PC 42:0; [M-Ac-H]-; GPCho(18:0/24:0)                                                   | 932.7426 |
| Negative | PC 42:1; [M-Ac-H]-; GPCho(18:1(11E)/24:0)                                              | 930.7191 |
| Negative | PC 42:10; [M-Ac-H]-;<br>GPCho(20:4(5E,8E,11E,14E)/22:6(4Z,7Z,10Z,13Z,16Z,19Z))         | 912.5771 |
| Negative | PC 42:2; [M+HCOO]-; GPCho(16:0/26:2(5E,9Z))                                            | 914.7256 |
| Negative | PC 42:2; [M+HCOO]-; GPCho(18:1(11E)/24:1(15Z))                                         | 914.7306 |
| Negative | PC 42:6; [M-Ac-H]-; GPCho(18:2(2E,4E)/24:4(5Z,8Z,11Z,14Z))                             | 920.6407 |
| Negative | PC 42:6; [M-Ac-H]-; GPCho(20:2(11Z,14Z)/22:4(7Z,10Z,13Z,16Z))                          | 920.6542 |
| Negative | PC 42:6; [M-Ac-H]-; GPCho(20:4(5E,8E,11E,14E)/22:2(13Z,16Z))                           | 920.6349 |
| Negative | PC 42:7; [M-CH3]-; GPCho(20:3(5Z,8Z,11Z)/22:4(7Z,10Z,13Z,16Z))                         | 845.5397 |
| Negative | PC 42:7; [M-CH3]-; GPCho(22:4(7Z,10Z,13Z,16Z)/20:3(8Z,11Z,14Z))                        | 845.535  |
| Negative | PC 42:9; [M-Ac-H]-; GPCho(20:3(5Z,8Z,11Z)/22:6(4Z,7Z,10Z,13Z,16Z,19Z))                 | 914.6039 |
| Negative | PC 42:9; [M-Ac-H]-; GPCho(20:4(5E,8E,11E,14E)/22:5(4Z,7Z,10Z,13Z,16Z))                 | 914.6035 |
| Negative | PC 44:12; [M-Ac-H]-;<br>GPCho(22:6(4Z,7Z,10Z,13Z,16Z,19Z)/22:6(4Z,7Z,10Z,13Z,16Z,19Z)) | 936.5775 |
| Negative | PC 45:4; [M-Ac-H]-; GPCho(20:4(5E,8E,11E,14E)/25:0)                                    | 966.7917 |
| Negative | CL 68:6; [M-2H](2-); CL(16:0/16:1/18:2/18:3)                                           | 696.496  |
| Negative | CL 72:4; [M-2H](2-); CL(16:0/20:3/18:0/18:1)                                           | 726.5098 |
| Negative | CL 72:6; [M-2H](2-); CL(18:1/16:0/18:1/20:4)                                           | 726.5087 |
| Negative | CL 72:7; [M-2H](2-); CL(18:1/18:2/18:2/18:2)                                           | 724.4895 |
| Negative | CL 72:8; [M-2H](2-); CL(16:1/20:4/18:2/18:1)                                           | 724.5256 |
| Negative | CL 72:8; [M-2H](2-); CL(18:1/18:2/18:2/18:3)                                           | 722.5133 |
| Negative | CL 72:8; [M-2H](2-); CL(18:2/18:1/18:2/18:3)                                           | 722.5171 |
| Negative | CL 72:8; [M-2H](2-); CL(18:2/18:2/18:2/18:2)                                           | 723.4806 |
| Negative | CL 72:9; [M-2H](2-); CL(16:0/20:4/18:3/18:2)                                           | 722.5158 |
| Negative | CL 74:10; [M-2H](2-); CL(16:1/16:0/20:4/22:5)                                          | 736.4954 |
| Negative | CL 74:10; [M-2H](2-); CL(20:4/16:0/20:4/18:2)                                          | 736.5462 |
| Negative | CL 74:2; [M-2H](2-); CL(18:0/18:1/18:0/20:1)                                           | 744.6007 |
| Negative | CL 74:4; [M-2H](2-); CL(18:0/18:1/18:2/20:1)                                           | 742.6389 |
| Negative | CL 74:4; [M-2H](2-); CL(18:0/20:1/18:1/18:2)                                           | 742.5622 |
| Negative | CL 74:6; [M-2H](2-); CL(18:1/18:1/20:2/18:2)                                           | 739.5134 |
| Negative | CL 74:7; [M-2H](2-); CL(18:1/18:1/18:2/20:3)                                           | 738.5417 |
| Negative | CL 74:7; [M-2H](2-); CL(18:1/18:2/18:1/20:3)                                           | 737.4955 |
| Negative | CL 74:7; [M-2H](2-); CL(18:1/20:2/18:2/18:2)                                           | 737.4972 |

|          |                                               |          |
|----------|-----------------------------------------------|----------|
| Negative | CL 74:7; [M-2H](2-); CL(18:2/18:2/20:2/18:1)  | 738.506  |
| Negative | CL 74:8; [M-2H](2-); CL(18:1/18:2/18:2/20:3)  | 736.4907 |
| Negative | CL 74:8; [M-2H](2-); CL(18:1/18:2/20:3/18:2)  | 736.4946 |
| Negative | CL 74:8; [M-2H](2-); CL(18:2/18:1/18:2/20:3)  | 737.4983 |
| Negative | CL 74:8; [M-2H](2-); CL(18:2/18:2/18:2/20:2)  | 737.4941 |
| Negative | CL 74:8; [M-2H](2-); CL(18:2/18:2/20:2/18:2)  | 737.4967 |
| Negative | CL 74:9; [M-2H](2-); CL(16:0/20:4/16:0/22:5)  | 736.4956 |
| Negative | CL 74:9; [M-2H](2-); CL(18:2/16:1/20:3/20:3)  | 736.4884 |
| Negative | CL 74:9; [M-2H](2-); CL(18:2/18:2/18:2/20:3)  | 736.4892 |
| Negative | CL 74:9; [M-2H](2-); CL(18:2/20:3/20:3/16:1)  | 736.4886 |
| Negative | CL 76:10; [M-2H](2-); CL(16:0/18:0/22:6/20:4) | 748.5351 |
| Negative | CL 76:10; [M-2H](2-); CL(16:0/20:4/18:0/22:6) | 749.5368 |
| Negative | CL 76:10; [M-2H](2-); CL(16:0/22:6/18:0/20:4) | 749.5321 |
| Negative | CL 76:10; [M-2H](2-); CL(16:0/22:6/20:4/18:0) | 748.5299 |
| Negative | CL 76:10; [M-2H](2-); CL(16:1/22:5/20:4/18:0) | 748.555  |
| Negative | CL 76:10; [M-2H](2-); CL(18:0/22:6/20:4/16:0) | 749.5305 |
| Negative | CL 76:10; [M-2H](2-); CL(18:2/18:0/18:2/22:6) | 748.5491 |
| Negative | CL 76:10; [M-2H](2-); CL(20:3/16:0/20:3/20:4) | 749.5439 |
| Negative | CL 76:11; [M-2H](2-); CL(14:0/18:0/22:5/22:6) | 748.5259 |
| Negative | CL 76:11; [M-2H](2-); CL(14:0/22:5/18:0/22:6) | 748.5546 |
| Negative | CL 76:11; [M-2H](2-); CL(16:1/18:0/20:4/22:6) | 749.5586 |
| Negative | CL 76:11; [M-2H](2-); CL(16:1/20:4/22:6/18:0) | 749.5479 |
| Negative | CL 76:2; [M-2H](2-); CL(16:0/20:1/22:0/18:1)  | 757.616  |
| Negative | CL 76:2; [M-2H](2-); CL(18:0/18:1/20:0/20:1)  | 756.6089 |
| Negative | CL 76:2; [M-2H](2-); CL(20:1/16:0/20:1/20:0)  | 756.5941 |
| Negative | CL 76:3; [M-2H](2-); CL(16:0/20:1/20:1/20:1)  | 756.596  |
| Negative | CL 76:4; [M-2H](2-); CL(18:1/20:0/18:1/20:2)  | 756.554  |
| Negative | CL 76:4; [M-2H](2-); CL(18:1/22:0/18:1/18:2)  | 756.5524 |
| Negative | CL 76:8; [M-2H](2-); CL(18:0/20:3/18:1/20:4)  | 750.5471 |
| Negative | CL 76:8; [M-2H](2-); CL(18:1/18:2/20:1/20:4)  | 752.558  |
| Negative | CL 76:8; [M-2H](2-); CL(18:1/20:2/18:1/20:4)  | 752.5949 |
| Negative | CL 76:9; [M-2H](2-); CL(16:0/18:0/20:4/22:5)  | 749.5361 |
| Negative | CL 76:9; [M-2H](2-); CL(16:0/18:0/22:5/20:4)  | 749.5297 |
| Negative | CL 76:9; [M-2H](2-); CL(16:0/20:4/18:0/22:5)  | 749.537  |
| Negative | CL 76:9; [M-2H](2-); CL(18:0/16:0/20:4/22:5)  | 749.536  |
| Negative | CL 76:9; [M-2H](2-); CL(18:2/20:4/20:2/18:1)  | 750.54   |
| Negative | CL 76:9; [M-2H](2-); CL(20:4/16:0/22:5/18:0)  | 749.527  |
| Negative | CL 78:10; [M-2H](2-); CL(18:2/22:5/20:3/18:0) | 764.5455 |
| Negative | CL 78:11; [M-2H](2-); CL(16:0/22:5/22:6/18:0) | 763.5708 |
| Negative | CL 78:12; [M-2H](2-); CL(22:6/16:0/22:6/18:0) | 762.5082 |
| Negative | CL 78:2; [M-2H](2-); CL(20:0/18:1/20:0/20:1)  | 772.5895 |

|          |                                                              |          |
|----------|--------------------------------------------------------------|----------|
| Negative | CL 78:4; [M-2H](2-); CL(20:0/18:2/20:0/20:2)                 | 770.5967 |
| Negative | CL 78:6; [M-2H](2-); CL(18:0/20:1/20:2/20:3)                 | 768.5564 |
| Negative | CL 78:6; [M-2H](2-); CL(18:1/20:0/20:2/20:3)                 | 768.5941 |
| Negative | CL 78:8; [M-2H](2-); CL(20:2/18:1/20:2/20:3)                 | 766.5618 |
| Negative | CL 80:10; [M-2H](2-); CL(20:3/20:0/20:3/20:4)                | 778.5455 |
| Negative | CL 80:12; [M-2H](2-); CL(18:0/18:1/22:5/22:6)                | 774.5437 |
| Negative | CL 80:12; [M-2H](2-); CL(18:2/22:5/20:2/20:3)                | 776.5556 |
| Negative | CL 80:13; [M-2H](2-); CL(18:0/18:2/22:5/22:6)                | 774.542  |
| Negative | CL 80:14; [M-2H](2-); CL(18:0/22:6/20:4/20:4)                | 772.5345 |
| Negative | CL 80:14; [M-2H](2-); CL(18:1/22:5/20:4/20:4)                | 772.5576 |
| Negative | CL 80:14; [M-2H](2-); CL(20:4/18:0/20:4/22:6)                | 772.5296 |
| Negative | CL 80:14; [M-2H](2-); CL(20:4/18:1/20:4/22:5)                | 772.544  |
| Negative | CL 80:9; [M-2H](2-); CL(18:0/20:0/20:4/22:5)                 | 778.5515 |
| Negative | CL 82:12; [M-2H](2-); CL(20:1/18:0/22:5/22:6)                | 790.5397 |
| Negative | CL 82:14; [M-2H](2-); CL(18:1/20:1/22:6/22:6)                | 786.6361 |
| Negative | CL 82:16; [M-2H](2-); CL(22:6/18:0/22:6/20:4)                | 786.5403 |
| Negative | CL 84:1; [M-2H](2-); CL(22:0/22:0/22:0/18:1)                 | 815.5773 |
| Negative | CL 84:14; [M-2H](2-); CL(22:5/20:0/22:5/20:4)                | 802.5753 |
| Negative | CL 84:15; [M-2H](2-); CL(20:4/20:1/22:5/22:5)                | 800.5759 |
| Negative | CL 84:18; [M-2H](2-); CL(20:4/22:5/20:4/22:5)                | 798.5407 |
| Negative | DGDG 20:1; [M-H]-; DGDG(2:0/18:1(11E))                       | 720.3666 |
| Negative | lysoPE 18:0; [M-H]-; PE(18:0/0:0)                            | 480.3081 |
| Negative | lysoPE 18:1; [M-H]-; PE(18:1(11E)/0:0)                       | 477.1981 |
| Negative | lysoPE 20:4; [M-H]-; PE(20:4(5E,8E,11E,14E)/0:0)             | 500.2785 |
| Negative | lysoPE 22:4; [M-H]-; PE(22:4(7Z,10Z,13Z,16Z)/0:0)            | 528.3079 |
| Negative | MGDG 28:2; [M-H]-; MGDG(2:0/26:2(5E,9Z))                     | 670.5885 |
| Negative | MGDG 34:1; [M-H]-; MGDG(16:0/18:1(11E))                      | 756.5873 |
| Negative | MGDG 36:1; [M-H]-; MGDG(16:0/20:1(11E))                      | 784.6204 |
| Negative | MGDG 36:2; [M-H]-; MGDG(18:0/18:2(2E,4E))                    | 782.5331 |
| Negative | MGDG 36:4; [M-H]-; MGDG(16:0/20:4(5E,8E,11E,14E))            | 778.5572 |
| Negative | MGDG 38:3; [M-H]-; MGDG(18:1(11E)/20:2(11Z,14Z))             | 808.6243 |
| Negative | MGDG 38:5; [M-H]-; MGDG(18:1(11E)/20:4(5E,8E,11E,14E))       | 802.5706 |
| Negative | MGDG 38:6; [M-H]-; MGDG(18:2(2E,4E)/20:4(5E,8E,11E,14E))     | 800.5527 |
| Negative | MGDG 40:3; [M-H]-; MGDG(20:1(11E)/20:2(11Z,14Z))             | 836.6549 |
| Negative | N-(hexadecanoyl)-sphing-4-enine; [M-H]-; Cer(d18:1(4E)/16:0) | 536.5187 |
| Negative | PA 16:0; [M-H]-; GPA(4:0/12:0)                               | 423.4188 |
| Negative | PA 19:1; [M-H]-; GPA(2:0/17:1(9Z))                           | 464.311  |
| Negative | PA 19:2; [M-H]-; GPA(2:0/17:2(9Z,12Z))                       | 462.2967 |
| Negative | PA 26:3; [M-H]-; GPA(8:0/18:3(6Z,9Z,12Z))                    | 558.4651 |
| Negative | PA 35:2; [M-H]-; GPA(17:1(9Z)/18:1(11E))                     | 686.5144 |
| Negative | PA 38:2; [M-H]-; GPA(18:1(11E)/20:1(11E))                    | 728.5619 |

|          |                                                                                            |          |
|----------|--------------------------------------------------------------------------------------------|----------|
| Negative | PA 40:1; [M-H] <sup>-</sup> ; GPA(20:0/20:1(11E))                                          | 756.6083 |
| Negative | PA 40:5; [M-H] <sup>-</sup> ; GPA(18:0/22:5(4Z,7Z,10Z,13Z,16Z))                            | 748.5604 |
| Negative | PA 40:6; [M-H] <sup>-</sup> ; GPA(18:0/22:6(4Z,7Z,10Z,13Z,16Z,19Z))                        | 746.5122 |
| Negative | PA 42:2; [M-H] <sup>-</sup> ; GPA(20:1(11E)/22:1(13Z))                                     | 782.6085 |
| Negative | PA 42:8; [M-H] <sup>-</sup> ; GPA(20:2(11Z,14Z)/22:6(4Z,7Z,10Z,13Z,16Z,19Z))               | 770.5104 |
| Negative | PA 44:1; [M-H] <sup>-</sup> ; GPA(18:1(11E)/26:0)                                          | 812.6171 |
| Negative | PA 44:11; [M-H] <sup>-</sup> ;<br>GPA(22:5(4Z,7Z,10Z,13Z,16Z)/22:6(4Z,7Z,10Z,13Z,16Z,19Z)) | 792.55   |
| Negative | PA 44:2; [M-H] <sup>-</sup> ; GPA(20:1(11E)/24:1(15Z))                                     | 812.6594 |
| Negative | PA 46:4; [M-H] <sup>-</sup> ; GPA(20:2(11Z,14Z)/26:2(5E,9Z))                               | 836.6498 |
| Negative | PC 32:1; [M+HCOO] <sup>-</sup> ; GPCho(15:1(9Z)/17:0)                                      | 776.5263 |
| Negative | PC 33:2; [M-Ac-H] <sup>-</sup> ; GPCho(15:0/18:2(2E,4E))                                   | 802.5568 |
| Negative | PC 33:2; [M-Ac-H] <sup>-</sup> ; GPCho(16:1(7Z)/17:1(9Z))                                  | 802.5624 |
| Negative | PC 34:0; [M-Ac-H] <sup>-</sup> ; GPCho(17:0/17:0)                                          | 820.6432 |
| Negative | PC 34:3; [M+HCOO] <sup>-</sup> ; GPCho(16:1(7Z)/18:2(2E,4E))                               | 800.5637 |
| Negative | PC 34:3; [M-Ac-H] <sup>-</sup> ; GPCho(16:0/18:3(6Z,9Z,12Z))                               | 814.5576 |
| Negative | PC 34:3; [M-Ac-H] <sup>-</sup> ; GPCho(16:1(7Z)/18:2(2E,4E))                               | 814.561  |
| Negative | PC 34:5; [M-CH3] <sup>-</sup> ; GPCho(14:0/20:5(5Z,8Z,11Z,14Z,17Z))                        | 736.4947 |
| Negative | PC 35:3; [M+HCOO] <sup>-</sup> ; GPCho(17:2(9Z,12Z)/18:1(11E))                             | 814.558  |
| Negative | PC 35:3; [M-Ac-H] <sup>-</sup> ; GPCho(17:1(9Z)/18:2(2E,4E))                               | 828.5813 |
| Negative | PC 35:3; [M-Ac-H] <sup>-</sup> ; GPCho(17:2(9Z,12Z)/18:1(11E))                             | 828.6092 |
| Negative | PC 36:2; [M+HCOO] <sup>-</sup> ; GPCho(16:1(7Z)/20:1(11E))                                 | 830.6216 |
| Negative | PC 36:2; [M+HCOO] <sup>-</sup> ; GPCho(18:0/18:2(2E,4E))                                   | 831.6127 |
| Negative | PC 36:4; [M+HCOO] <sup>-</sup> ; GPCho(18:2(2E,4E)/18:2(2E,4E))                            | 826.5652 |
| Negative | PC 38:3; [M-CH3] <sup>-</sup> ; GPCho(20:2(11Z,14Z)/18:1(11E))                             | 796.5883 |
| Negative | PC 38:6; [M+HCOO] <sup>-</sup> ; GPCho(16:0/22:6(4Z,7Z,10Z,13Z,16Z,19Z))                   | 850.566  |
| Negative | PC 39:1; [M-Ac-H] <sup>-</sup> ; GPCho(18:1(11E)/21:0)                                     | 888.7073 |
| Negative | PC 39:4; [M-Ac-H] <sup>-</sup> ; GPCho(19:0/20:4(5E,8E,11E,14E))                           | 882.663  |
| Negative | PC 39:5; [M-Ac-H] <sup>-</sup> ; GPCho(17:1(9Z)/22:4(7Z,10Z,13Z,16Z))                      | 880.6434 |
| Negative | PC 40:1; [M-Ac-H] <sup>-</sup> ; GPCho(18:1(11E)/22:0)                                     | 902.6997 |
| Negative | PC 40:4; [M-Ac-H] <sup>-</sup> ; GPCho(20:1(11E)/20:3(5Z,8Z,11Z))                          | 896.6333 |
| Negative | PC 40:5; [M-Ac-H] <sup>-</sup> ; GPCho(18:1(11E)/22:4(7Z,10Z,13Z,16Z))                     | 894.6292 |
| Negative | PC 40:5; [M-Ac-H] <sup>-</sup> ; GPCho(20:2(11Z,14Z)/20:3(5Z,8Z,11Z))                      | 894.6236 |
| Negative | PC 40:5; [M-CH3] <sup>-</sup> ; GPCho(18:1(11E)/22:4(7Z,10Z,13Z,16Z))                      | 821.5333 |
| Negative | PC 40:5; [M-CH3] <sup>-</sup> ; GPCho(22:4(7Z,10Z,13Z,16Z)/18:1(11E))                      | 821.5305 |
| Negative | PC 40:7; [M-Ac-H] <sup>-</sup> ; GPCho(20:3(5Z,8Z,11Z)/20:4(5E,8E,11E,14E))                | 890.6028 |
| Negative | PC 42:8; [M-CH3] <sup>-</sup> ; GPCho(22:5(4Z,7Z,10Z,13Z,16Z)/20:3(5Z,8Z,11Z))             | 843.523  |
| Negative | PE 30:0; [M-H] <sup>-</sup> ; GPEn(14:0/16:0)                                              | 662.4769 |
| Negative | PE 31:1; [M-H] <sup>-</sup> ; GPEn(15:0/16:1(7Z))                                          | 674.5144 |
| Negative | PE 32:0; [M-H] <sup>-</sup> ; GPEn(16:0/16:0)                                              | 690.5023 |
| Negative | PE 32:1; [M-H] <sup>-</sup> ; GPEn(14:0/18:1(11E))                                         | 688.4937 |
| Negative | PE 32:1; [M-H] <sup>-</sup> ; GPEn(16:0/16:1(7Z))                                          | 688.4931 |

|          |                                                                   |          |
|----------|-------------------------------------------------------------------|----------|
| Negative | PE 32:2; [M-H] <sup>-</sup> ; GPEtn(14:0/18:2(2E,4E))             | 686.4773 |
| Negative | PE 32:2; [M-H] <sup>-</sup> ; GPEtn(14:1(9Z)/18:1(11E))           | 686.4766 |
| Negative | PE 32:2; [M-H] <sup>-</sup> ; GPEtn(16:1(7Z)/16:1(7Z))            | 686.4798 |
| Negative | PE 33:1; [M-H] <sup>-</sup> ; GPEtn(15:0/18:1(11E))               | 702.5098 |
| Negative | PE 33:1; [M-H] <sup>-</sup> ; GPEtn(16:1(7Z)/17:0)                | 702.5071 |
| Negative | PE 33:2; [M-H] <sup>-</sup> ; GPEtn(15:0/18:2(2E,4E))             | 700.4932 |
| Negative | PE 33:2; [M-H] <sup>-</sup> ; GPEtn(16:1(7Z)/17:1(9Z))            | 700.493  |
| Negative | PE 34:0; [M-H] <sup>-</sup> ; GPEtn(16:0/18:0)                    | 718.5404 |
| Negative | PE 34:0; [M-H] <sup>-</sup> ; GPEtn(17:0/17:0)                    | 718.5348 |
| Negative | PE 34:1; [M-H] <sup>-</sup> ; GPEtn(16:0/18:1(11E))               | 716.5232 |
| Negative | PE 34:2; [M-H] <sup>-</sup> ; GPEtn(16:0/18:2(2E,4E))             | 714.5066 |
| Negative | PE 34:2; [M-H] <sup>-</sup> ; GPEtn(16:1(7Z)/18:1(11E))           | 714.5106 |
| Negative | PE 34:3; [M-H] <sup>-</sup> ; GPEtn(16:0/18:3(6Z,9Z,12Z))         | 712.4932 |
| Negative | PE 35:1; [M-H] <sup>-</sup> ; GPEtn(17:0/18:1(11E))               | 730.5381 |
| Negative | PE 35:2; [M-H] <sup>-</sup> ; GPEtn(17:0/18:2(2E,4E))             | 728.5237 |
| Negative | PE 35:2; [M-H] <sup>-</sup> ; GPEtn(17:1(9Z)/18:1(11E))           | 728.5887 |
| Negative | PE 35:3; [M-H] <sup>-</sup> ; GPEtn(17:1(9Z)/18:2(2E,4E))         | 726.5082 |
| Negative | PE 35:4; [M-H] <sup>-</sup> ; GPEtn(15:0/20:4(5E,8E,11E,14E))     | 724.4924 |
| Negative | PE 36:0; [M-H] <sup>-</sup> ; GPEtn(16:0/20:0)                    | 746.5729 |
| Negative | PE 36:1; [M-H] <sup>-</sup> ; GPEtn(18:0/18:1(11E))               | 744.5582 |
| Negative | PE 36:2; [M-H] <sup>-</sup> ; GPEtn(18:0/18:2(2E,4E))             | 742.5402 |
| Negative | PE 36:2; [M-H] <sup>-</sup> ; GPEtn(18:1(11E)/18:1(11E))          | 742.541  |
| Negative | PE 36:3; [M-H] <sup>-</sup> ; GPEtn(16:0/20:3(5Z,8Z,11Z))         | 740.6008 |
| Negative | PE 36:3; [M-H] <sup>-</sup> ; GPEtn(18:1(11E)/18:2(2E,4E))        | 740.5262 |
| Negative | PE 36:4; [M-H] <sup>-</sup> ; GPEtn(18:1(11E)/18:3(6Z,9Z,12Z))    | 738.507  |
| Negative | PE 36:4; [M-H] <sup>-</sup> ; GPEtn(18:2(2E,4E)/18:2(2E,4E))      | 738.5104 |
| Negative | PE 36:5; [M-H] <sup>-</sup> ; GPEtn(16:0/20:5(5Z,8Z,11Z,14Z,17Z)) | 736.493  |
| Negative | PE 36:5; [M-H] <sup>-</sup> ; GPEtn(16:1(7Z)/20:4(5E,8E,11E,14E)) | 736.4913 |
| Negative | PE 36:5; [M-H] <sup>-</sup> ; GPEtn(18:2(2E,4E)/18:3(6Z,9Z,12Z))  | 736.4952 |
| Negative | PE 37:2; [M-H] <sup>-</sup> ; GPEtn(18:2(2E,4E)/19:0)             | 756.5509 |
| Negative | PE 37:4; [M-H] <sup>-</sup> ; GPEtn(17:0/20:4(5E,8E,11E,14E))     | 752.5258 |
| Negative | PE 37:5; [M-H] <sup>-</sup> ; GPEtn(17:1(9Z)/20:4(5E,8E,11E,14E)) | 750.5123 |
| Negative | PE 38:1; [M-H] <sup>-</sup> ; GPEtn(18:0/20:1(11E))               | 772.5843 |
| Negative | PE 38:1; [M-H] <sup>-</sup> ; GPEtn(18:1(11E)/20:0)               | 772.5862 |
| Negative | PE 38:2; [M-H] <sup>-</sup> ; GPEtn(18:0/20:2(11Z,14Z))           | 770.5722 |
| Negative | PE 38:2; [M-H] <sup>-</sup> ; GPEtn(18:2(2E,4E)/20:0)             | 770.5702 |
| Negative | PE 38:3; [M-H] <sup>-</sup> ; GPEtn(18:1(11E)/20:2(11Z,14Z))      | 768.5549 |
| Negative | PE 38:3; [M-H] <sup>-</sup> ; GPEtn(18:2(2E,4E)/20:1(11E))        | 768.5561 |
| Negative | PE 38:4; [M-H] <sup>-</sup> ; GPEtn(16:0/22:4(7Z,10Z,13Z,16Z))    | 766.5424 |
| Negative | PE 38:4; [M-H] <sup>-</sup> ; GPEtn(18:0/20:4(5E,8E,11E,14E))     | 766.5415 |
| Negative | PE 38:4; [M-H] <sup>-</sup> ; GPEtn(18:1(11E)/20:3(5Z,8Z,11Z))    | 766.5395 |

|          |                                                                              |          |
|----------|------------------------------------------------------------------------------|----------|
| Negative | PE 38:4; [M-H] <sup>-</sup> ; GPEtn(18:2(2E,4E)/20:2(11Z,14Z))               | 766.5376 |
| Negative | PE 38:5; [M-H] <sup>-</sup> ; GPEtn(18:0/20:5(5Z,8Z,11Z,14Z,17Z))            | 764.5246 |
| Negative | PE 38:5; [M-H] <sup>-</sup> ; GPEtn(18:1(11E)/20:4(5E,8E,11E,14E))           | 764.5243 |
| Negative | PE 38:5; [M-H] <sup>-</sup> ; GPEtn(18:2(2E,4E)/20:3(5Z,8Z,11Z))             | 765.5565 |
| Negative | PE 38:6; [M-H] <sup>-</sup> ; GPEtn(16:0/22:6(4Z,7Z,10Z,13Z,16Z,19Z))        | 762.577  |
| Negative | PE 39:1; [M-H] <sup>-</sup> ; GPEtn(18:1(11E)/21:0)                          | 786.5998 |
| Negative | PE 39:4; [M-H] <sup>-</sup> ; GPEtn(17:0/22:4(7Z,10Z,13Z,16Z))               | 780.5519 |
| Negative | PE 39:5; [M-H] <sup>-</sup> ; GPEtn(17:0/22:5(4Z,7Z,10Z,13Z,16Z))            | 778.5447 |
| Negative | PE 40:1; [M-H] <sup>-</sup> ; GPEtn(16:0/24:1(15Z))                          | 800.6147 |
| Negative | PE 40:1; [M-H] <sup>-</sup> ; GPEtn(18:0/22:1(13Z))                          | 800.623  |
| Negative | PE 40:1; [M-H] <sup>-</sup> ; GPEtn(18:1(11E)/22:0)                          | 800.6201 |
| Negative | PE 40:1; [M-H] <sup>-</sup> ; GPEtn(20:0/20:1(11E))                          | 800.6152 |
| Negative | PE 40:2; [M-H] <sup>-</sup> ; GPEtn(18:0/22:2(13Z,16Z))                      | 798.529  |
| Negative | PE 40:2; [M-H] <sup>-</sup> ; GPEtn(18:1(11E)/22:1(13Z))                     | 798.6009 |
| Negative | PE 40:2; [M-H] <sup>-</sup> ; GPEtn(18:2(2E,4E)/22:0)                        | 798.6038 |
| Negative | PE 40:3; [M-H] <sup>-</sup> ; GPEtn(18:1(11E)/22:2(13Z,16Z))                 | 796.5865 |
| Negative | PE 40:3; [M-H] <sup>-</sup> ; GPEtn(18:2(2E,4E)/22:1(13Z))                   | 796.5836 |
| Negative | PE 40:3; [M-H] <sup>-</sup> ; GPEtn(20:0/20:3(5Z,8Z,11Z))                    | 796.586  |
| Negative | PE 40:4; [M-H] <sup>-</sup> ; GPEtn(16:0/24:4(5Z,8Z,11Z,14Z))                | 794.491  |
| Negative | PE 40:4; [M-H] <sup>-</sup> ; GPEtn(18:0/22:4(7Z,10Z,13Z,16Z))               | 794.571  |
| Negative | PE 40:4; [M-H] <sup>-</sup> ; GPEtn(20:0/20:4(5E,8E,11E,14E))                | 794.5692 |
| Negative | PE 40:4; [M-H] <sup>-</sup> ; GPEtn(20:1(11E)/20:3(5Z,8Z,11Z))               | 794.5998 |
| Negative | PE 40:5; [M-H] <sup>-</sup> ; GPEtn(18:0/22:5(4Z,7Z,10Z,13Z,16Z))            | 792.5545 |
| Negative | PE 40:5; [M-H] <sup>-</sup> ; GPEtn(18:1(11E)/22:4(7Z,10Z,13Z,16Z))          | 792.5563 |
| Negative | PE 40:5; [M-H] <sup>-</sup> ; GPEtn(20:1(11E)/20:4(5E,8E,11E,14E))           | 792.5534 |
| Negative | PE 40:6; [M-H] <sup>-</sup> ; GPEtn(18:1(11E)/22:5(4Z,7Z,10Z,13Z,16Z))       | 790.539  |
| Negative | PE 40:6; [M-H] <sup>-</sup> ; GPEtn(20:2(11Z,14Z)/20:4(5E,8E,11E,14E))       | 790.5432 |
| Negative | PE 40:7; [M-H] <sup>-</sup> ; GPEtn(18:2(2E,4E)/22:5(4Z,7Z,10Z,13Z,16Z))     | 788.5211 |
| Negative | PE 40:8; [M-H] <sup>-</sup> ; GPEtn(18:2(2E,4E)/22:6(4Z,7Z,10Z,13Z,16Z,19Z)) | 786.5356 |
| Negative | PE 41:2; [M-H] <sup>-</sup> ; GPEtn(18:2(2E,4E)/23:0)                        | 812.618  |
| Negative | PE 42:0; [M-H] <sup>-</sup> ; GPEtn(18:0/24:0)                               | 830.6082 |
| Negative | PE 42:1; [M-H] <sup>-</sup> ; GPEtn(16:0/26:1(5Z))                           | 828.6468 |
| Negative | PE 42:1; [M-H] <sup>-</sup> ; GPEtn(18:1(11E)/24:0)                          | 828.6482 |
| Negative | PE 42:2; [M-H] <sup>-</sup> ; GPEtn(18:1(11E)/24:1(15Z))                     | 826.6372 |
| Negative | PE 42:2; [M-H] <sup>-</sup> ; GPEtn(18:2(2E,4E)/24:0)                        | 826.6352 |
| Negative | PE 42:3; [M-H] <sup>-</sup> ; GPEtn(18:2(2E,4E)/24:1(15Z))                   | 824.6166 |
| Negative | PE 42:3; [M-H] <sup>-</sup> ; GPEtn(18:3(6Z,9Z,12Z)/24:0)                    | 824.6185 |
| Negative | PE 42:3; [M-H] <sup>-</sup> ; GPEtn(20:3(5Z,8Z,11Z)/22:0)                    | 824.6214 |
| Negative | PE 42:4; [M-H] <sup>-</sup> ; GPEtn(18:0/24:4(5Z,8Z,11Z,14Z))                | 822.6024 |
| Negative | PE 42:4; [M-H] <sup>-</sup> ; GPEtn(20:3(5Z,8Z,11Z)/22:1(13Z))               | 822.6176 |
| Negative | PE 42:4; [M-H] <sup>-</sup> ; GPEtn(20:4(5E,8E,11E,14E)/22:0)                | 822.6052 |



|          |                                                                                               |          |
|----------|-----------------------------------------------------------------------------------------------|----------|
| Negative | PE 42:5; [M-H] <sup>-</sup> ; GPETn(20:0/22:5(4Z,7Z,10Z,13Z,16Z))                             | 820.6367 |
| Negative | PE 42:5; [M-H] <sup>-</sup> ; GPETn(20:1(11E)/22:4(7Z,10Z,13Z,16Z))                           | 820.5914 |
| Negative | PE 42:8; [M-H] <sup>-</sup> ; GPETn(20:2(11Z,14Z)/22:6(4Z,7Z,10Z,13Z,16Z,19Z))                | 814.5436 |
| Negative | PE 44:1; [M-H] <sup>-</sup> ; GPETn(20:1(11E)/24:0)                                           | 856.6864 |
| Negative | PE 44:12; [M-H] <sup>-</sup> ; GPETn(22:6(4Z,7Z,10Z,13Z,16Z,19Z)/22:6(4Z,7Z,10Z,13Z,16Z,19Z)) | 834.5256 |
| Negative | PE 44:4; [M-H] <sup>-</sup> ; GPETn(20:4(5E,8E,11E,14E)/24:0)                                 | 850.6369 |
| Negative | PG 32:0; [M-H] <sup>-</sup> ; GPGro(16:0/16:0)                                                | 721.5022 |
| Negative | PG 33:0; [M-H] <sup>-</sup> ; GPGro(16:0/17:0)                                                | 735.6261 |
| Negative | PG 34:0; [M-H] <sup>-</sup> ; GPGro(16:0/18:0)                                                | 749.5346 |
| Negative | PG 34:1; [M-H] <sup>-</sup> ; GPGro(16:0/18:1(11E))                                           | 747.5204 |
| Negative | PG 34:2; [M-H] <sup>-</sup> ; GPGro(16:0/18:2(2E,4E))                                         | 745.5023 |
| Negative | PG 34:2; [M-H] <sup>-</sup> ; GPGro(16:1(7Z)/18:1(11E))                                       | 745.4993 |
| Negative | PG 35:1; [M-H] <sup>-</sup> ; GPGro(17:0/18:1(11E))                                           | 761.5366 |
| Negative | PG 36:0; [M-H] <sup>-</sup> ; GPGro(18:0/18:0)                                                | 777.5701 |
| Negative | PG 36:1; [M-H] <sup>-</sup> ; GPGro(18:0/18:1(11E))                                           | 775.5924 |
| Negative | PG 36:2; [M-H] <sup>-</sup> ; GPGro(16:0/20:2(11Z,14Z))                                       | 773.5346 |
| Negative | PG 36:2; [M-H] <sup>-</sup> ; GPGro(18:1(11E)/18:1(11E))                                      | 773.537  |
| Negative | PG 36:3; [M-H] <sup>-</sup> ; GPGro(16:0/20:3(5Z,8Z,11Z))                                     | 771.5233 |
| Negative | PG 36:4; [M-H] <sup>-</sup> ; GPGro(16:0/20:4(5E,8E,11E,14E))                                 | 769.5042 |
| Negative | PG 36:4; [M-H] <sup>-</sup> ; GPGro(18:2(2E,4E)/18:2(2E,4E))                                  | 769.5075 |
| Negative | PG 38:2; [M-H] <sup>-</sup> ; GPGro(18:0/20:2(11Z,14Z))                                       | 801.6173 |
| Negative | PG 38:3; [M-H] <sup>-</sup> ; GPGro(18:0/20:3(5Z,8Z,11Z))                                     | 799.5477 |
| Negative | PG 38:3; [M-H] <sup>-</sup> ; GPGro(18:1(11E)/20:2(11Z,14Z))                                  | 799.552  |
| Negative | PG 38:4; [M-H] <sup>-</sup> ; GPGro(18:0/20:4(5E,8E,11E,14E))                                 | 797.5395 |
| Negative | PG 38:5; [M-H] <sup>-</sup> ; GPGro(18:1(11E)/20:4(5E,8E,11E,14E))                            | 795.5178 |
| Negative | PG 38:5; [M-H] <sup>-</sup> ; GPGro(18:2(2E,4E)/20:3(5Z,8Z,11Z))                              | 795.5195 |
| Negative | PG 38:6; [M-H] <sup>-</sup> ; GPGro(16:0/22:6(4Z,7Z,10Z,13Z,16Z,19Z))                         | 793.5035 |
| Negative | PG 38:6; [M-H] <sup>-</sup> ; GPGro(18:2(2E,4E)/20:4(5E,8E,11E,14E))                          | 793.5039 |
| Negative | PG 40:3; [M-H] <sup>-</sup> ; GPGro(18:1(11E)/22:2(13Z,16Z))                                  | 827.5861 |
| Negative | PG 40:4; [M-H] <sup>-</sup> ; GPGro(18:0/22:4(7Z,10Z,13Z,16Z))                                | 825.5653 |
| Negative | PG 40:4; [M-H] <sup>-</sup> ; GPGro(20:1(11E)/20:3(5Z,8Z,11Z))                                | 825.5628 |
| Negative | PG 40:5; [M-H] <sup>-</sup> ; GPGro(18:1(11E)/22:4(7Z,10Z,13Z,16Z))                           | 823.5525 |
| Negative | PG 40:6; [M-H] <sup>-</sup> ; GPGro(18:0/22:6(4Z,7Z,10Z,13Z,16Z,19Z))                         | 821.5378 |
| Negative | PG 40:6; [M-H] <sup>-</sup> ; GPGro(18:1(11E)/22:5(4Z,7Z,10Z,13Z,16Z))                        | 821.537  |
| Negative | PG 40:6; [M-H] <sup>-</sup> ; GPGro(18:2(2E,4E)/22:4(7Z,10Z,13Z,16Z))                         | 821.5645 |
| Negative | PG 40:7; [M-H] <sup>-</sup> ; GPGro(18:1(11E)/22:6(4Z,7Z,10Z,13Z,16Z,19Z))                    | 819.66   |
| Negative | PG 40:7; [M-H] <sup>-</sup> ; GPGro(20:3(5Z,8Z,11Z)/20:4(5E,8E,11E,14E))                      | 819.5189 |
| Negative | PG 42:6; [M-H] <sup>-</sup> ; GPGro(20:1(11E)/22:5(4Z,7Z,10Z,13Z,16Z))                        | 849.566  |
| Negative | PG 42:6; [M-H] <sup>-</sup> ; GPGro(20:2(11Z,14Z)/22:4(7Z,10Z,13Z,16Z))                       | 849.5703 |
| Negative | PG 42:9; [M-H] <sup>-</sup> ; GPGro(20:3(5Z,8Z,11Z)/22:6(4Z,7Z,10Z,13Z,16Z,19Z))              | 843.5187 |
| Negative | PG 42:9; [M-H] <sup>-</sup> ; GPGro(20:4(5E,8E,11E,14E)/22:5(4Z,7Z,10Z,13Z,16Z))              | 843.5203 |

|          |                                                                            |          |
|----------|----------------------------------------------------------------------------|----------|
| Negative | PI 32:0; [M-H] <sup>-</sup> ; GPIIns(16:0/16:0)                            | 809.5235 |
| Negative | PI 34:0; [M-H] <sup>-</sup> ; GPIIns(16:0/18:0)                            | 837.5539 |
| Negative | PI 34:1; [M-H] <sup>-</sup> ; GPIIns(16:0/18:1(11E))                       | 835.532  |
| Negative | PI 34:1; [M-H] <sup>-</sup> ; GPIIns(16:1(7Z)/18:0)                        | 835.5649 |
| Negative | PI 34:2; [M-H] <sup>-</sup> ; GPIIns(16:1(7Z)/18:1(11E))                   | 833.5264 |
| Negative | PI 35:1; [M-H] <sup>-</sup> ; GPIIns(17:0/18:1(11E))                       | 849.5531 |
| Negative | PI 36:1; [M-H] <sup>-</sup> ; GPIIns(18:0/18:1(11E))                       | 863.5634 |
| Negative | PI 36:2; [M-H] <sup>-</sup> ; GPIIns(18:1(11E)/18:1(11E))                  | 861.5547 |
| Negative | PI 38:2; [M-H] <sup>-</sup> ; GPIIns(18:0/20:2(11Z,14Z))                   | 889.5788 |
| Negative | PI 38:3; [M-H] <sup>-</sup> ; GPIIns(18:0/20:3(5Z,8Z,11Z))                 | 887.5686 |
| Negative | PI 38:4; [M-H] <sup>-</sup> ; GPIIns(16:0/22:4(7Z,10Z,13Z,16Z))            | 885.5553 |
| Negative | PI 38:4; [M-H] <sup>-</sup> ; GPIIns(18:0/20:4(5E,8E,11E,14E))             | 885.556  |
| Negative | PI 38:4; [M-H] <sup>-</sup> ; GPIIns(18:1(11E)/20:3(5Z,8Z,11Z))            | 885.5729 |
| Negative | PI 38:6; [M-H] <sup>-</sup> ; GPIIns(16:0/22:6(4Z,7Z,10Z,13Z,16Z,19Z))     | 881.5209 |
| Negative | PI 38:6; [M-H] <sup>-</sup> ; GPIIns(18:2(2E,4E)/20:4(5E,8E,11E,14E))      | 881.5192 |
| Negative | PI 40:4; [M-H] <sup>-</sup> ; GPIIns(18:0/22:4(7Z,10Z,13Z,16Z))            | 913.5858 |
| Negative | PI 40:4; [M-H] <sup>-</sup> ; GPIIns(20:0/20:4(5E,8E,11E,14E))             | 913.5823 |
| Negative | PI 40:5; [M-H] <sup>-</sup> ; GPIIns(18:0/22:5(4Z,7Z,10Z,13Z,16Z))         | 911.5678 |
| Negative | plasmenyl-PE 32:1; [M-H] <sup>-</sup> ; PE(P-16:0/16:1(7Z))                | 672.4991 |
| Negative | plasmenyl-PE 33:0; [M-H] <sup>-</sup> ; PE(P-16:0/17:0)                    | 688.2674 |
| Negative | plasmenyl-PE 33:1; [M-H] <sup>-</sup> ; PE(P-16:0/17:1(9Z))                | 686.5149 |
| Negative | plasmenyl-PE 33:1; [M-H] <sup>-</sup> ; PE(P-18:0/15:1(9Z))                | 686.2684 |
| Negative | plasmenyl-PE 34:1; [M-H] <sup>-</sup> ; PE(P-16:0/18:1(11E))               | 700.5325 |
| Negative | plasmenyl-PE 34:1; [M-H] <sup>-</sup> ; PE(P-18:0/16:1(7Z))                | 700.4941 |
| Negative | plasmenyl-PE 34:2; [M-H] <sup>-</sup> ; PE(P-16:0/18:2(2E,4E))             | 698.5154 |
| Negative | plasmenyl-PE 35:0; [M-H] <sup>-</sup> ; PE(P-18:0/17:0)                    | 716.5584 |
| Negative | plasmenyl-PE 36:0; [M-H] <sup>-</sup> ; PE(P-18:0/18:0)                    | 730.6046 |
| Negative | plasmenyl-PE 36:0; [M-H] <sup>-</sup> ; PE(P-20:0/16:0)                    | 730.5758 |
| Negative | plasmenyl-PE 36:1; [M-H] <sup>-</sup> ; PE(P-18:0/18:1(11E))               | 728.52   |
| Negative | plasmenyl-PE 36:3; [M-H] <sup>-</sup> ; PE(P-16:0/20:3(5Z,8Z,11Z))         | 724.5259 |
| Negative | plasmenyl-PE 36:3; [M-H] <sup>-</sup> ; PE(P-18:0/18:3(6Z,9Z,12Z))         | 724.5261 |
| Negative | plasmenyl-PE 36:3; [M-H] <sup>-</sup> ; PE(P-18:0/18:3(9Z,12Z,15Z))        | 724.5283 |
| Negative | plasmenyl-PE 36:4; [M-H] <sup>-</sup> ; PE(P-16:0/20:4(5E,8E,11E,14E))     | 722.5147 |
| Negative | plasmenyl-PE 36:5; [M-H] <sup>-</sup> ; PE(P-16:0/20:5(5Z,8Z,11Z,14Z,17Z)) | 720.5009 |
| Negative | plasmenyl-PE 38:1; [M-H] <sup>-</sup> ; PE(P-16:0/22:1(13Z))               | 756.6168 |
| Negative | plasmenyl-PE 38:1; [M-H] <sup>-</sup> ; PE(P-18:0/20:1(11E))               | 756.5904 |
| Negative | plasmenyl-PE 38:1; [M-H] <sup>-</sup> ; PE(P-20:0/18:1(11E))               | 756.6242 |
| Negative | plasmenyl-PE 38:4; [M-H] <sup>-</sup> ; PE(P-16:0/22:4(7Z,10Z,13Z,16Z))    | 750.5467 |
| Negative | plasmenyl-PE 38:4; [M-H] <sup>-</sup> ; PE(P-18:0/20:4(5E,8E,11E,14E))     | 750.5463 |
| Negative | plasmenyl-PE 38:5; [M-H] <sup>-</sup> ; PE(P-16:0/22:5(4Z,7Z,10Z,13Z,16Z)) | 748.5282 |
| Negative | plasmenyl-PE 38:5; [M-H] <sup>-</sup> ; PE(P-18:0/20:5(5Z,8Z,11Z,14Z,17Z)) | 748.591  |

|          |                                                                                |          |
|----------|--------------------------------------------------------------------------------|----------|
| Negative | plasmenyl-PE 38:6; [M-H] <sup>-</sup> ; PE(P-16:0/22:6(4Z,7Z,10Z,13Z,16Z,19Z)) | 746.5143 |
| Negative | plasmenyl-PE 40:1; [M-H] <sup>-</sup> ; PE(P-18:0/22:1(13Z))                   | 784.6219 |
| Negative | plasmenyl-PE 40:2; [M-H] <sup>-</sup> ; PE(P-18:0/22:2(13Z,16Z))               | 782.609  |
| Negative | plasmenyl-PE 40:4; [M-H] <sup>-</sup> ; PE(P-16:0/24:4(5Z,8Z,11Z,14Z))         | 778.5744 |
| Negative | plasmenyl-PE 40:4; [M-H] <sup>-</sup> ; PE(P-20:0/20:4(5E,8E,11E,14E))         | 778.5765 |
| Negative | plasmenyl-PE 40:5; [M-H] <sup>-</sup> ; PE(P-18:0/22:5(4Z,7Z,10Z,13Z,16Z))     | 776.5598 |
| Negative | plasmenyl-PE 42:1; [M-H] <sup>-</sup> ; PE(P-18:0/24:1(15Z))                   | 812.6592 |
| Negative | plasmenyl-PE 42:4; [M-H] <sup>-</sup> ; PE(P-18:0/24:4(5Z,8Z,11Z,14Z))         | 806.6059 |
| Negative | plasmenyl-PE 42:4; [M-H] <sup>-</sup> ; PE(P-20:0/22:4(7Z,10Z,13Z,16Z))        | 806.6109 |
| Negative | plasmenyl-PE 42:5; [M-H] <sup>-</sup> ; PE(P-20:0/22:5(4Z,7Z,10Z,13Z,16Z))     | 804.5943 |
| Negative | plasmenyl-PE 42:6; [M-H] <sup>-</sup> ; PE(P-20:0/22:6(4Z,7Z,10Z,13Z,16Z,19Z)) | 802.5783 |
| Negative | PS 31:0; [M-H] <sup>-</sup> ; GPSer(15:0/16:0)                                 | 720.5092 |
| Negative | PS 32:0; [M-H] <sup>-</sup> ; GPSer(14:0/18:0)                                 | 734.5349 |
| Negative | PS 33:1; [M-H] <sup>-</sup> ; GPSer(15:0/18:1(11E))                            | 746.5406 |
| Negative | PS 33:2; [M-H] <sup>-</sup> ; GPSer(15:1(9Z)/18:1(11E))                        | 744.6048 |
| Negative | PS 34:0; [M-H] <sup>-</sup> ; GPSer(16:0/18:0)                                 | 762.5222 |
| Negative | PS 34:1; [M-H] <sup>-</sup> ; GPSer(16:0/18:1(11E))                            | 760.5137 |
| Negative | PS 34:1; [M-H] <sup>-</sup> ; GPSer(16:1(7Z)/18:0)                             | 760.515  |
| Negative | PS 34:2; [M-H] <sup>-</sup> ; GPSer(16:1(7Z)/18:1(11E))                        | 758.5333 |
| Negative | PS 35:2; [M-H] <sup>-</sup> ; GPSer(17:0/18:2(2E,4E))                          | 772.5421 |
| Negative | PS 35:2; [M-H] <sup>-</sup> ; GPSer(17:1(9Z)/18:1(11E))                        | 772.5904 |
| Negative | PS 36:1; [M-H] <sup>-</sup> ; GPSer(18:0/18:1(11E))                            | 788.6239 |
| Negative | PS 36:2; [M-H] <sup>-</sup> ; GPSer(18:0/18:2(2E,4E))                          | 786.5311 |
| Negative | PS 36:2; [M-H] <sup>-</sup> ; GPSer(18:1(11E)/18:1(11E))                       | 786.5305 |
| Negative | PS 36:3; [M-H] <sup>-</sup> ; GPSer(16:0/20:3(5Z,8Z,11Z))                      | 784.5141 |
| Negative | PS 36:3; [M-H] <sup>-</sup> ; GPSer(18:0/18:3(6Z,9Z,12Z))                      | 784.5128 |
| Negative | PS 36:3; [M-H] <sup>-</sup> ; GPSer(18:1(11E)/18:2(2E,4E))                     | 784.5157 |
| Negative | PS 37:2; [M-H] <sup>-</sup> ; GPSer(18:2(2E,4E)/19:0)                          | 800.5883 |
| Negative | PS 37:3; [M-H] <sup>-</sup> ; GPSer(17:0/20:3(5Z,8Z,11Z))                      | 798.5325 |
| Negative | PS 37:5; [M-H] <sup>-</sup> ; GPSer(17:1(9Z)/20:4(5E,8E,11E,14E))              | 794.5344 |
| Negative | PS 38:1; [M-H] <sup>-</sup> ; GPSer(18:0/20:1(11E))                            | 816.5719 |
| Negative | PS 38:1; [M-H] <sup>-</sup> ; GPSer(18:1(11E)/20:0)                            | 816.5787 |
| Negative | PS 38:2; [M-H] <sup>-</sup> ; GPSer(18:0/20:2(11Z,14Z))                        | 814.5618 |
| Negative | PS 38:2; [M-H] <sup>-</sup> ; GPSer(18:1(11E)/20:1(11E))                       | 814.5611 |
| Negative | PS 38:2; [M-H] <sup>-</sup> ; GPSer(18:2(2E,4E)/20:0)                          | 814.5557 |
| Negative | PS 38:3; [M-H] <sup>-</sup> ; GPSer(18:1(11E)/20:2(11Z,14Z))                   | 812.6028 |
| Negative | PS 38:3; [M-H] <sup>-</sup> ; GPSer(18:2(2E,4E)/20:1(11E))                     | 812.5414 |
| Negative | PS 38:4; [M-H] <sup>-</sup> ; GPSer(16:0/22:4(7Z,10Z,13Z,16Z))                 | 810.5296 |
| Negative | PS 38:4; [M-H] <sup>-</sup> ; GPSer(18:0/20:4(5E,8E,11E,14E))                  | 810.5334 |
| Negative | PS 38:4; [M-H] <sup>-</sup> ; GPSer(18:1(11E)/20:3(5Z,8Z,11Z))                 | 810.5314 |
| Negative | PS 38:5; [M-H] <sup>-</sup> ; GPSer(18:1(11E)/20:4(5E,8E,11E,14E))             | 808.5144 |

|          |                                                                                                  |          |
|----------|--------------------------------------------------------------------------------------------------|----------|
| Negative | PS 39:4; [M-H] <sup>-</sup> ; GPser(19:0/20:4(5E,8E,11E,14E))                                    | 824.5783 |
| Negative | PS 39:5; [M-H] <sup>-</sup> ; GPser(17:0/22:5(4Z,7Z,10Z,13Z,16Z))                                | 822.5394 |
| Negative | PS 40:1; [M-H] <sup>-</sup> ; GPser(16:1(7Z)/24:0)                                               | 844.6104 |
| Negative | PS 40:1; [M-H] <sup>-</sup> ; GPser(18:1(11E)/22:0)                                              | 844.6089 |
| Negative | PS 40:2; [M-H] <sup>-</sup> ; GPser(18:2(2E,4E)/22:0)                                            | 842.59   |
| Negative | PS 40:3; [M-H] <sup>-</sup> ; GPser(18:1(11E)/22:2(13Z,16Z))                                     | 840.5802 |
| Negative | PS 40:3; [M-H] <sup>-</sup> ; GPser(18:2(2E,4E)/22:1(13Z))                                       | 840.5755 |
| Negative | PS 40:3; [M-H] <sup>-</sup> ; GPser(20:0/20:3(5Z,8Z,11Z))                                        | 840.5875 |
| Negative | PS 40:4; [M-H] <sup>-</sup> ; GPser(18:0/22:4(7Z,10Z,13Z,16Z))                                   | 838.5618 |
| Negative | PS 40:5; [M-H] <sup>-</sup> ; GPser(18:1(11E)/22:4(7Z,10Z,13Z,16Z))                              | 836.5637 |
| Negative | PS 40:6; [M-H] <sup>-</sup> ; GPser(18:0/22:6(4Z,7Z,10Z,13Z,16Z,19Z))                            | 834.5313 |
| Negative | PS 40:6; [M-H] <sup>-</sup> ; GPser(18:1(11E)/22:5(4Z,7Z,10Z,13Z,16Z))                           | 834.5169 |
| Negative | PS 40:7; [M-H] <sup>-</sup> ; GPser(18:1(11E)/22:6(4Z,7Z,10Z,13Z,16Z,19Z))                       | 832.5145 |
| Negative | PS 41:1; [M-H] <sup>-</sup> ; GPser(18:1(11E)/23:0)                                              | 858.6252 |
| Negative | PS 42:2; [M-H] <sup>-</sup> ; GPser(18:1(11E)/24:1(15Z))                                         | 870.6239 |
| Negative | PS 42:2; [M-H] <sup>-</sup> ; GPser(18:2(2E,4E)/24:0)                                            | 870.6279 |
| Negative | PS 42:3; [M-H] <sup>-</sup> ; GPser(18:2(2E,4E)/24:1(15Z))                                       | 868.6084 |
| Negative | PS 42:3; [M-H] <sup>-</sup> ; GPser(20:3(5Z,8Z,11Z)/22:0)                                        | 868.6097 |
| Negative | PS 42:4; [M-H] <sup>-</sup> ; GPser(18:0/24:4(5Z,8Z,11Z,14Z))                                    | 866.5886 |
| Negative | PS 42:4; [M-H] <sup>-</sup> ; GPser(20:3(5Z,8Z,11Z)/22:1(13Z))                                   | 866.5889 |
| Negative | PS 42:4; [M-H] <sup>-</sup> ; GPser(20:4(5E,8E,11E,14E)/22:0)                                    | 866.595  |
| Negative | PS 42:5; [M-H] <sup>-</sup> ; GPser(18:1(11E)/24:4(5Z,8Z,11Z,14Z))                               | 864.6749 |
| Negative | PS 42:5; [M-H] <sup>-</sup> ; GPser(20:0/22:5(4Z,7Z,10Z,13Z,16Z))                                | 864.5739 |
| Negative | PS 42:5; [M-H] <sup>-</sup> ; GPser(20:4(5E,8E,11E,14E)/22:1(13Z))                               | 864.5892 |
| Negative | PS 44:12; [M-H] <sup>-</sup> ;<br>GPser(22:6(4Z,7Z,10Z,13Z,16Z,19Z)/22:6(4Z,7Z,10Z,13Z,16Z,19Z)) | 878.5072 |
| Negative | PS 44:3; [M-H] <sup>-</sup> ; GPser(20:3(5Z,8Z,11Z)/24:0)                                        | 896.6399 |
| Negative | PS 44:4; [M-H] <sup>-</sup> ; GPser(20:4(5E,8E,11E,14E)/24:0)                                    | 894.6263 |
| Negative | PS 44:5; [M-H] <sup>-</sup> ; GPser(20:4(5E,8E,11E,14E)/24:1(15Z))                               | 892.6155 |
| Negative | PS 44:6; [M-H] <sup>-</sup> ; GPser(22:0/22:6(4Z,7Z,10Z,13Z,16Z,19Z))                            | 890.5987 |
| Negative | PS 46:5; [M-H] <sup>-</sup> ; GPser(22:5(4Z,7Z,10Z,13Z,16Z)/24:0)                                | 920.6399 |

**Supplementary Table S2.**

|                       |                                                           |
|-----------------------|-----------------------------------------------------------|
| <b>Race/ethnicity</b> | African American (Bladder Cancer n=12)                    |
|                       | European American (Bladder Cancer n=14)                   |
| <b>Stage</b>          | pTa/pTis (n=1)                                            |
|                       | pT1 (n=1)                                                 |
|                       | pT2 (n=1)                                                 |
|                       | pT3 (n=7)                                                 |
|                       | pT4 (n=4)                                                 |
|                       | Unknown (n=12)                                            |
| <b>Gender</b>         | Male (n= 15); Female (n=11 )                              |
| <b>Smoking Status</b> | Current (n= 13 ); Former(n=5); Never (n=6); Unknown(n=2 ) |

Supplementary Table S3:

| Lipids                                                                        | P-value_ttest | BH.P-value_ttest |
|-------------------------------------------------------------------------------|---------------|------------------|
| CE(22:5); [M+NH <sub>4</sub> ] <sup>+</sup> ; 22:5 Cholesteryl ester          | 0.001870612   | 0.117427191      |
| Unknown 68:2; [M-2H] <sup>(2-)</sup> ; Unknown(16:0/18:1/16:1/18:0)           | 0.005756968   | 0.163990521      |
| Unknown 70:3; [M-2H] <sup>(2-)</sup> ; Unknown(16:0/18:0/18:1/18:2)           | 0.005217288   | 0.155121165      |
| Unknown 70:4; [M-2H] <sup>(2-)</sup> ; Unknown(16:1/18:1/18:2/18:0)           | 0.001904225   | 0.117427191      |
| Unknown 72:5; [M-2H] <sup>(2-)</sup> ; Unknown(18:1/18:0/18:2/18:2)           | 0.008633848   | 0.189149436      |
| Unknown 84:1; [M-2H] <sup>(2-)</sup> ; Unknown(22:0/22:0/22:0/18:1)           | 0.007790179   | 0.18014788       |
| DG 32:1; [M+NH <sub>4</sub> ] <sup>+</sup> ; DG(14:0/18:1/0:0)                | 0.003677427   | 0.150283111      |
| DG 32:1; [M+NH <sub>4</sub> ] <sup>+</sup> ; DG(16:0/16:1/0:0)                | 0.003490523   | 0.150283111      |
| DG 34:2; [M+NH <sub>4</sub> ] <sup>+</sup> ; DG(16:0/18:2/0:0)                | 0.00151822    | 0.113942359      |
| DG 34:2; [M+NH <sub>4</sub> ] <sup>+</sup> ; DG(16:1/18:1/0:0)                | 0.002281658   | 0.135677184      |
| DGDG 20:1; [M-H] <sup>-</sup> ; DGDG(2:0/18:1(11E))                           | 0.005911565   | 0.163990521      |
| lysoPC 20:3; [M+H] <sup>+</sup> ; PC(20:3(5Z,8Z,11Z)/0:0)                     | 5.28951E-05   | 0.018733831      |
| lysoPC 22:1; [M+H] <sup>+</sup> ; PC(22:1(13Z)/0:0)                           | 0.000173144   | 0.018733831      |
| lysoPC 22:2; [M+H] <sup>+</sup> ; PC(22:2(13Z,16Z)/0:0)                       | 3.84731E-05   | 0.018733831      |
| lysoPC 26:1; [M+H] <sup>+</sup> ; PC(26:1(5Z)/0:0)                            | 5.75057E-05   | 0.018733831      |
| N-(hexacosanoyl)-sphinganine; [M+H] <sup>+</sup> ; Cer(d18:0/26:0)            | 0.001573979   | 0.113942359      |
| PC 22:5; [M+HCOO] <sup>-</sup> ; GPCho(2:0/20:5(5Z,8Z,11Z,14Z,17Z))           | 0.000116392   | 0.018733831      |
| PC 28:0; [M+Ac-H] <sup>-</sup> ; GPCho(14:0/14:0)                             | 0.006008061   | 0.163990521      |
| PC 31:6; [M+H] <sup>+</sup> ; GPCho(9:0/22:6(4Z,7Z,10Z,13Z,16Z,19Z))          | 9.61316E-05   | 0.018733831      |
| PC 32:0; [M+Na] <sup>+</sup> ; GPCho(10:0/22:0)                               | 0.004294834   | 0.150283111      |
| PC 32:0; [M+Na] <sup>+</sup> ; GPCho(11:0/21:0)                               | 0.004220369   | 0.150283111      |
| PC 32:0; [M+Na] <sup>+</sup> ; GPCho(14:0/18:0)                               | 0.004198211   | 0.150283111      |
| PC 32:0; [M+Na] <sup>+</sup> ; GPCho(15:0/17:0)                               | 0.004153284   | 0.150283111      |
| PC 32:0; [M+Na] <sup>+</sup> ; GPCho(16:0/16:0)                               | 0.004124618   | 0.150283111      |
| PC 32:0; [M+Na] <sup>+</sup> ; GPCho(19:0/13:0)                               | 0.004453794   | 0.150283111      |
| PC 32:0; [M+Na] <sup>+</sup> ; GPCho(24:0/8:0)                                | 0.004141113   | 0.150283111      |
| PC 32:0; [M+Na] <sup>+</sup> ; GPCho(6:0/26:0)                                | 0.004061015   | 0.150283111      |
| PC 32:0; [M+Na] <sup>+</sup> ; GPCho(7:0/25:0)                                | 0.00411562    | 0.150283111      |
| PC 32:0; [M+Na] <sup>+</sup> ; GPCho(8:0/24:0)                                | 0.003902275   | 0.150283111      |
| PC 32:1; [M+Na] <sup>+</sup> ; GPCho(12:0/20:1(11Z))                          | 0.004153382   | 0.150283111      |
| PC 32:1; [M+Na] <sup>+</sup> ; GPCho(16:0/16:1(7Z))                           | 0.003820828   | 0.150283111      |
| PC 32:2; [M+Na] <sup>+</sup> ; GPCho(14:0/18:2(2E,4E))                        | 0.000180025   | 0.018733831      |
| PC 32:2; [M+Na] <sup>+</sup> ; GPCho(16:1(7Z)/16:1(7Z))                       | 0.000139723   | 0.018733831      |
| PC 34:0; [M+H] <sup>+</sup> ; GPCho(17:0/17:0)                                | 0.012345484   | 0.244705121      |
| PC 34:3; [M+H] <sup>+</sup> ; GPCho(16:0/18:3(6Z,9Z,12Z))                     | 0.004214381   | 0.150283111      |
| PC 34:3; [M+H] <sup>+</sup> ; GPCho(16:1(7Z)/18:2(2E,4E))                     | 0.004743267   | 0.150283111      |
| PC 34:3; [M+Na] <sup>+</sup> ; GPCho(16:1(7Z)/18:2(2E,4E))                    | 0.004997502   | 0.151288013      |
| PC 34:3; [M+Ac-H] <sup>-</sup> ; GPCho(16:1(7Z)/18:2(2E,4E))                  | 0.006178056   | 0.165095771      |
| PC 34:4; [M+H] <sup>+</sup> ; GPCho(10:0/24:4(5Z,8Z,11Z,14Z))                 | 0.004121789   | 0.150283111      |
| PC 34:5; [M+H] <sup>+</sup> ; GPCho(14:0/20:5(5Z,8Z,11Z,14Z,17Z))             | 0.000170688   | 0.018733831      |
| PC 34:5; [M+H] <sup>+</sup> ; GPCho(16:1(9Z)/18:4(6Z,9Z,12Z,15Z))             | 0.000148995   | 0.018733831      |
| PC 35:1; [M+Na] <sup>+</sup> ; GPCho(17:0/18:1(11E))                          | 0.000135654   | 0.018733831      |
| PC 35:3; [M+HCOO] <sup>-</sup> ; GPCho(17:2(9Z,12Z)/18:1(11E))                | 0.006601025   | 0.166525846      |
| PC 36:4; [M+Na] <sup>+</sup> ; GPCho(12:0/24:4(5Z,8Z,11Z,14Z))                | 0.008420747   | 0.186940583      |
| PC 36:4; [M+Na] <sup>+</sup> ; GPCho(16:0/20:4(5E,8E,11E,14E))                | 0.008767587   | 0.189584843      |
| PC 36:4; [M+Na] <sup>+</sup> ; GPCho(18:2(2E,4E)/18:2(2E,4E))                 | 0.009567557   | 0.204230538      |
| PC 36:6; [M+H] <sup>+</sup> ; GPCho(18:3(6Z,9Z,12Z)/18:3(6Z,9Z,12Z))          | 0.012025954   | 0.241243543      |
| PC 36:8; [M+Na] <sup>+</sup> ; GPCho(18:4(6Z,9Z,12Z,15Z)/18:4(6Z,9Z,12Z,15Z)) | 0.000105501   | 0.018733831      |
| PC 37:0; [M+H] <sup>+</sup> ; GPCho(12:0/25:0)                                | 0.011336913   | 0.230194638      |
| PC 37:4; [M+H] <sup>+</sup> ; GPCho(13:0/24:4(5Z,8Z,11Z,14Z))                 | 0.000197022   | 0.019296552      |
| PC 37:4; [M+H] <sup>+</sup> ; GPCho(17:0/20:4(5E,8E,11E,14E))                 | 0.000118766   | 0.018733831      |
| PC 37:4; [M+H] <sup>+</sup> ; GPCho(18:4(6Z,9Z,12Z,15Z)/19:0)                 | 0.000161295   | 0.018733831      |
| PC 38:7; [M+H] <sup>+</sup> ; GPCho(18:2(2E,4E)/20:5(5Z,8Z,11Z,14Z,17Z))      | 0.00691166    | 0.17175991       |

|                                                                            |             |             |
|----------------------------------------------------------------------------|-------------|-------------|
| PC 38:7; [M+H] <sup>+</sup> ; GPCho(18:3(6Z,9Z,12Z)/20:4(5E,8E,11E,14E))   | 0.007677337 | 0.180038964 |
| PC 39:1; [M-Ac-H] <sup>-</sup> ; GPCho(18:1(11E)/21:0)                     | 0.012573397 | 0.246290659 |
| PC 40:1; [M-Ac-H] <sup>-</sup> ; GPCho(18:1(11E)/22:0)                     | 0.002570761 | 0.142677249 |
| PC 40:5; [M+HCOO] <sup>-</sup> ; GPCho(18:3(6Z,9Z,12Z)/22:2(13Z,16Z))      | 0.001309591 | 0.113942359 |
| PC 40:5; [M+HCOO] <sup>-</sup> ; GPCho(20:1(11E)/20:4(5E,8E,11E,14E))      | 0.000590016 | 0.054576496 |
| PC 40:5; [M+HCOO] <sup>-</sup> ; GPCho(20:2(11Z,14Z)/20:3(5Z,8Z,11Z))      | 0.002485684 | 0.142677249 |
| PC 41:0; [M-Ac-H] <sup>-</sup> ; GPCho(16:0/25:0)                          | 0.001380426 | 0.113942359 |
| PC 41:1; [M-Ac-H] <sup>-</sup> ; GPCho(15:1(9Z)/26:0)                      | 0.001825743 | 0.117427191 |
| PC 41:1; [M-Ac-H] <sup>-</sup> ; GPCho(18:1(11E)/23:0)                     | 0.001703324 | 0.117427191 |
| PC 42:0; [M-Ac-H] <sup>-</sup> ; GPCho(18:0/24:0)                          | 0.001473135 | 0.113942359 |
| PC 42:1; [M-Ac-H] <sup>-</sup> ; GPCho(18:1(11E)/24:0)                     | 0.007213731 | 0.174070475 |
| PC 42:5; [M+H] <sup>+</sup> ; GPCho(20:1(11E)/22:4(7Z,10Z,13Z,16Z))        | 0.00761659  | 0.180038964 |
| PC 42:6; [M-Ac-H] <sup>-</sup> ; GPCho(20:2(11Z,14Z)/22:4(7Z,10Z,13Z,16Z)) | 0.011233732 | 0.230194638 |
| PC 42:6; [M-Ac-H] <sup>-</sup> ; GPCho(20:4(5E,8E,11E,14E)/22:2(13Z,16Z))  | 0.012768836 | 0.247210612 |
| PE 34:2; [M+H] <sup>+</sup> ; GPETn(16:0/18:2(2E,4E))                      | 0.005941527 | 0.163990521 |
| PE 34:2; [M+H] <sup>+</sup> ; GPETn(16:1(7Z)/18:1(11E))                    | 0.004531868 | 0.150283111 |
| PE 35:2; [M+H] <sup>+</sup> ; GPETn(13:0/22:2(13Z,16Z))                    | 0.004866702 | 0.150283111 |
| PE 35:2; [M+H] <sup>+</sup> ; GPETn(17:0/18:2(2E,4E))                      | 0.004687222 | 0.150283111 |
| PE 35:2; [M+H] <sup>+</sup> ; GPETn(17:1(9Z)/18:1(11E))                    | 0.004874047 | 0.150283111 |
| PE 35:2; [M+H] <sup>+</sup> ; GPETn(9:0/26:2(5E,9Z))                       | 0.00483428  | 0.150283111 |
| PE 37:4; [M+H] <sup>+</sup> ; GPETn(17:0/20:4(5E,8E,11E,14E))              | 0.004174319 | 0.150283111 |
| PE 37:5; [M+H] <sup>+</sup> ; GPETn(17:1(9Z)/20:4(5E,8E,11E,14E))          | 0.000136271 | 0.018733831 |
| PG 40:6; [M-H] <sup>-</sup> ; GPGro(18:2(2E,4E)/22:4(7Z,10Z,13Z,16Z))      | 0.006492204 | 0.166300296 |
| PI 34:1; [M-H] <sup>-</sup> ; GPIIns(16:0/18:1(11E))                       | 0.004535112 | 0.150283111 |
| PS 36:3; [M-H] <sup>-</sup> ; GPSer(16:0/20:3(5Z,8Z,11Z))                  | 0.006477545 | 0.166300296 |
| PS 36:3; [M-H] <sup>-</sup> ; GPSer(18:0/18:3(6Z,9Z,12Z))                  | 0.007204929 | 0.174070475 |
| PS 36:3; [M-H] <sup>-</sup> ; GPSer(18:1(11E)/18:2(2E,4E))                 | 0.008161446 | 0.183632525 |
| PS 38:2; [M-H] <sup>-</sup> ; GPSer(18:0/20:2(11Z,14Z))                    | 0.00592106  | 0.163990521 |
| PS 38:2; [M-H] <sup>-</sup> ; GPSer(18:1(11E)/20:1(11E))                   | 0.006246867 | 0.165095771 |
| PS 38:2; [M-H] <sup>-</sup> ; GPSer(18:2(2E,4E)/20:0)                      | 0.007972605 | 0.18184092  |
| PS 42:5; [M-H] <sup>-</sup> ; GPSer(18:1(11E)/24:4(5Z,8Z,11Z,14Z))         | 0.010078835 | 0.212421013 |
| SM 32:0; [M] <sup>+</sup> ; SM(d14:0/18:0)                                 | 4.74597E-05 | 0.018733831 |
| SM 44:2; [M+Na] <sup>+</sup> ; SM(d18:1(4E)/26:1(17Z))                     | 0.011029976 | 0.229561386 |
